# Supplementary material for: Pragmatic trial evaluating the effectiveness of a patient navigator to decrease emergency room utilisation in transition age youth with chronic conditions: the Transition Navigator Trial protocol
Source: PubMed Central journal article supplement — BMJ Open. 2019 Dec 10;9(12):e034309. doi: 10.1136/bmjopen-2019-034309 (PMC6924868; doi:10.1136/bmjopen-2019-034309), 2019-12-10
Supplement: bmjopen-2019-034309.draft_revisions.pdf [file bmjopen-2019-034309.draft_revisions.pdf]

# BMJ Open

BMJ Open is committed to open peer review. As part of this commitment we make the peer review history of every article we publish publicly available.

When an article is published we post the peer reviewers' comments and the authors' responses online. We also post the versions of the paper that were used during peer review. These are the versions that the peer review comments apply to.

The versions of the paper that follow are the versions that were submitted during the peer review process. They are not the versions of record or the final published versions. They should not be cited or distributed as the published version of this manuscript.

BMJ Open is an open access journal and the full, final, typeset and author-corrected version of record of the manuscript is available on our site with no access controls, subscription charges or pay-per-view fees (<http://bmjopen.bmj.com>).

If you have any questions on BMJ Open's open peer review process please email [info.bmjopen@bmj.com](mailto:info.bmjopen@bmj.com)

# BMJ Open

## A pragmatic trial evaluating the effectiveness of a patient navigator to decrease emergency room utilization in transition age youth with chronic conditions: The Transition Navigator Trial

|                               |                                                                                                                                                                                                                                                                                                                                                                                                                                                                                                                                                                                                                                                                                        |
|-------------------------------|----------------------------------------------------------------------------------------------------------------------------------------------------------------------------------------------------------------------------------------------------------------------------------------------------------------------------------------------------------------------------------------------------------------------------------------------------------------------------------------------------------------------------------------------------------------------------------------------------------------------------------------------------------------------------------------|
| Journal:                      | <i>BMJ Open</i>                                                                                                                                                                                                                                                                                                                                                                                                                                                                                                                                                                                                                                                                        |
| Manuscript ID                 | bmjopen-2019-034309                                                                                                                                                                                                                                                                                                                                                                                                                                                                                                                                                                                                                                                                    |
| Article Type:                 | Protocol                                                                                                                                                                                                                                                                                                                                                                                                                                                                                                                                                                                                                                                                               |
| Date Submitted by the Author: | 13-Sep-2019                                                                                                                                                                                                                                                                                                                                                                                                                                                                                                                                                                                                                                                                            |
| Complete List of Authors:     | Samuel, Susan; University of Calgary, Department of Pediatrics<br>Dimitropoulos, Gina<br>Schraeder, Kyleigh ; University of Calgary, Pediatrics<br>Klarenbach, Scott; University of Alberta<br>Nettel-Aguirre, Alberto; University of Calgary Cumming School of Medicine<br>Guilcher, Greg<br>Pacaud, D; University of Calgary, Department of Paediatrics<br>Pinzon, Jorge<br>Lang, Eddy; University of Calgary, Emergency Medicine<br>Andrew, Gail<br>Zwaigenbaum, Lonnie; University of Alberta,<br>Scott, Shannon; University of Alberta, Nursing<br>McBrien, Kerry; University of Calgary, Community Health Sciences<br>Hamiwka, Lorraine<br>Mackie, Andrew; University of Alberta |
| Keywords:                     | PAEDIATRICS, Paediatric A&E and ambulatory care < PAEDIATRICS, Paediatric nephrology < NEPHROLOGY                                                                                                                                                                                                                                                                                                                                                                                                                                                                                                                                                                                      |
|                               |                                                                                                                                                                                                                                                                                                                                                                                                                                                                                                                                                                                                                                                                                        |

SCHOLARONE™  
Manuscripts

1  
2  
3 **Title:** A pragmatic trial evaluating the effectiveness of a patient navigator to decrease emergency  
4 room utilization in transition age youth with chronic conditions: The Transition Navigator Trial  
5  
6  
7

8 **Short title:** Transition Navigator Trial  
9  
10

11  
12 **Clinicaltrials.gov Identifier:** NCT03342495  
13  
14  
15

16 **Protocol Version 1.0**  
17  
18

19  
20 **November 1, 2017**  
21  
22

23  
24 **Trial Sponsor:** Alberta Health Services, Alberta Children's Hospital Foundation, Stollery  
25 Children's Hospital Foundation, Canadian Institutes of Health Research  
26  
27

28  
29 **Role of study sponsor:** The funders had no role in the design of this study.  
30  
31

32  
33 **Coordinating Centre:** University of Calgary  
34  
35

### 36 **Corresponding Author**

37  
38 Dr. Susan M. Samuel  
39 28 Oki Drive NW  
40 Calgary, AB  
41 T3B 6A8  
42 Tel: 403 955 7950  
43 Fax: 403 955 2203  
44 Email: [susan.samuel@ahs.ca](mailto:susan.samuel@ahs.ca)  
45  
46  
47  
48  
49

### 50 **Authors**

51 Susan M. Samuel <sup>1</sup>

52 Gina Dimitropoulos <sup>2</sup>

53 Kyleigh Schraeder <sup>3</sup>  
54  
55  
56  
57  
58  
59  
60

1  
2  
3 Scott Klarenbach <sup>7</sup>

4  
5 Alberto Nettel-Aguirre <sup>10</sup>

6  
7 Greg Guilcher <sup>5</sup>

8  
9 Daniele Pacaud <sup>11</sup>

10  
11 Jorge Pinzon <sup>3</sup>

12  
13 Eddy Lang <sup>8</sup>

14  
15 Gail Andrew <sup>4</sup>

16  
17 Lonnie Zwaigenbaum <sup>13</sup>

18  
19 Shannon Scott <sup>12</sup>

20  
21 Kerry McBrien <sup>9</sup>

22  
23 Lorraine Hamiwka <sup>6</sup>

24  
25 Andrew S. Mackie <sup>14</sup>

26  
27  
28 <sup>1</sup> Alberta Children's Hospital Research Institute, O'Brien Institute for Public Health, Department  
29 of Pediatrics, Section Of Nephrology, Department of Community Health Sciences, University of  
30 Calgary, Calgary, Alberta, Canada

31  
32  
33 <sup>2</sup> Faculty of Social Work, Department of Psychiatry, Alberta Children's Hospital Research  
34 Institute, University of Calgary, Calgary, Alberta, Canada

35  
36  
37 <sup>3</sup> Alberta Children's Hospital Research Institute, Department of Pediatrics, University of  
38 Calgary, Calgary, Alberta, Canada

39  
40  
41 <sup>4</sup> Department of Pediatrics, University of Alberta, Edmonton, Alberta, Canada

42  
43  
44 <sup>5</sup> Section of Pediatric Oncology and Blood and Marrow Transplant, Alberta Children's Hospital,  
45 University of Calgary, Calgary, Alberta, Canada

46  
47  
48 <sup>6</sup> Section of Nephrology, Alberta Children's Hospital, University of Calgary, Calgary, Alberta,  
49 Canada

50  
51  
52 <sup>7</sup> Department of Medicine, Division of Nephrology, University of Alberta, Edmonton, Alberta,  
53 Canada

54  
55  
56 <sup>8</sup> Department of Emergency Medicine, University of Calgary, Calgary, Alberta, Canada

57  
58  
59 <sup>9</sup> Department of Family Medicine, Department of Community Health Sciences, University of  
60 Calgary, Calgary, Alberta, Canada

1  
2  
3  
4 <sup>10</sup> Alberta Children's Hospital Research Institute, O'Brien Institute for Public Health,  
5 Department of Pediatrics, Department of Community Health Sciences, University of Calgary,  
6 Calgary, Alberta, Canada  
7

8  
9 <sup>11</sup> Division of Diabetes and Endocrinology, Alberta Children's Hospital, Calgary, Alberta,  
10 Canada  
11

12 <sup>12</sup> Faculty of Nursing, University of Alberta, Edmonton, Alberta, Canada  
13

14 <sup>13</sup> Department of Pediatrics, Autism Research Centre, University of Alberta, Edmonton, Alberta,  
15 Canada  
16

17  
18 <sup>14</sup> Division of Cardiology, Department of Pediatrics, University of Alberta, Edmonton, Alberta,  
19 Canada  
20

#### 21 **Author contribution:**

22  
23 All authors contributed to the conception, design, and funding applications for this trial. The  
24 authors continue to provide oversight for this trial.  
25

26  
27 **Operational Oversight Committee:** Catherine Morrison (Alberta Health Services), Jorge  
28 Pinzon (Department of Pediatrics, University of Calgary), Gail Andrew (Department of  
29 Pediatrics, University of Alberta), Catherine Hill (Alberta Health Services), Karen Johnston  
30 (Alberta Health Services), Susan Hughes (Alberta Health Services), Katie Byford Richardson  
31 (Alberta Health Services), Jane Bankes (Alberta Health Services), Jake Jennings (Alberta Health  
32 Services), Kyleigh Schraeder (University of Calgary), Brooke Allemang (University of  
33 Calgary), Elizabeth Morgan-Maver (University of Calgary), Gurkeet Lalli (University of  
34 Calgary), Daniella San Martin-Feeney (University of Alberta), Laurel Ryan (University of  
35 Calgary)  
36  
37

38  
39  
40 **Trial Management Committee:** Alberto Nettel-Aguirre (University of Calgary), Daniele  
41 Pacaud (Department of Pediatrics, University of Calgary), Greg Guilcher (Section of Pediatric  
42 Oncology and Blood and Marrow Transplant, University of Calgary), Eddy Lang (Department of  
43 Emergency Medicine, University of Calgary), Gail Andrew (Department of Pediatrics,  
44 University of Alberta), Iwona Wrobel (Department of Pediatrics, University of Calgary), Jorge  
45 Pinzon (Department of Pediatrics, University of Calgary), Kerry McBrien (Department of  
46 Family Medicine, Department of Community Health Sciences, University of Calgary), Lonnie  
47 Zwaigenbaum (Department of Pediatrics, Autism Research Centre, University of Alberta),  
48 Lorraine Hamiwka (Department of Pediatrics, University of Calgary), Scott Klarenbach  
49 (Department of Medicine, University of Alberta), April Elliott (Department of Pediatrics,  
50 University of Calgary), Catherine Morrison (Alberta Health Services), Catherine Hill (Alberta  
51 Health Services), Karen Johnston (Alberta Health Services), Kyleigh Schraeder (Department of  
52 Pediatrics, University of Calgary), Renee Farrell (Department of Pediatrics, University of  
53  
54  
55  
56  
57

1  
2  
3 Calgary), Elizabeth Morgan-Maver (University of Calgary), Gurkeet Lalli (University of  
4 Calgary), Daniella San Martin-Feeney (University of Alberta), Laurel Ryan (University of  
5 Calgary)  
6  
7  
8

9  
10 **Data Safety Monitoring Board:** Dr. Mario Cappelli (Children's Hospital of Eastern Ontario  
11 Research Institute, University of Ottawa), Dr. Anne Stephenson (Institute of Health Policy,  
12 Management and Evaluation, University of Toronto), Dr. Mina Matsuda-Abedini (Division of  
13 Nephrology, The Hospital for Sick Children, University of Toronto)  
14  
15

16  
17 **Scientific Advisory Board:** Dr. Graham Reid (Children's Health Research Institute, University  
18 of Western Ontario), Dr. Bethany Foster (Research Institute of the McGill University Health  
19 Centre, McGill University), Dr. Astrid Guttman (Senior Scientific Officer, Institute for Clinical  
20 Evaluative Sciences, University of Toronto)  
21  
22  
23  
24  
25  
26  
27  
28  
29  
30

31 **Key Words:** adolescence, emerging adulthood, transition to adult care, pragmatic trial  
32  
33  
34  
35  
36  
37

38 **Word Count: 4000 (limit is 4000 words)**  
39  
40  
41  
42  
43  
44  
45  
46  
47  
48  
49  
50  
51  
52  
53  
54  
55  
56  
57  
58  
59  
60

## ABSTRACT

**Background:** Transition to adult care is a challenging and complex process for youth with special health care needs.

**Objectives:** To compare effectiveness of a patient navigator service in reducing emergency room (ER) use among adolescents with chronic health conditions transitioning to adult care.

**Design:** Pragmatic randomized controlled trial parallel group design comparing ER visit rates between patients with access to a personalized navigator intervention compared to usual care. Unit of randomization is the patient. Treatment assignment will not be blinded. Embedded qualitative study to understand navigator's role and cost analysis attributable to the intervention will be performed.

**Setting:** Province of Alberta, Canada, recruitment from 3 tertiary care pediatric hospitals

**Participants:** Patients age 16-21 years, followed within a chronic disease clinic, and expected to be transferred to adult care within 12 months and reside in Alberta during study period. Sample size is determined to be 300 in each arm.

**Intervention:** Navigator intervention over 24 months is designed to assist participants in 4 domains: transition preparation, health system brokering, socioeconomic determinants of health, and self-management.

**Primary and secondary outcome measures:** Primary outcome is ER visit rate during observation period. Secondary outcomes are ambulatory and in-patient care utilization measures, as well as Transition Readiness Assessment Questionnaire score, and Short-Form Health Survey 12 (SF-12) score at 6 and 18 months post-randomization.

**Analysis:** Intention to treat analysis will be used. Poisson regression will compare rates of ER/urgent care visits between navigator and control participants. A cost analysis of the intervention will be conducted using high quality administrative health datasets. Thematic analysis will be used to identify perceptions of stakeholders regarding the role of navigators in reducing barriers to care.

**Conclusion:** The study results have the potential to change health care delivery and improve health outcomes and transition experiences of youth with special health care needs.

Abstract word count: 294

**Trial Registration:** Clinicaltrials.gov NCT03342495

### Strengths and Limitations of this study

#### [5 short bullet points]

- Population based sample
- Pragmatic randomized controlled trial design
- Innovative navigator intervention, provided within the healthcare setting
- Inclusion of youth having a broad range of chronic health conditions

For peer review only



## INTRODUCTION

Approximately 15-20% of adolescents in North America live with a chronic health condition, defined as a condition that lasts at least 3 months, is not yet curable, affects a child's normal activities, and requires ongoing care.<sup>1</sup> The majority (>90%) will require transfer from pediatric to adult services.<sup>1,2</sup> Sub-optimal transition to adult care leads to poor adherence with ambulatory care management, health deterioration and increased use of costly emergent health services.<sup>3,4</sup> Patient navigators are a promising, but unproven intervention to facilitate planned transitions from pediatric to adult care, and improve patient experience and outcomes.<sup>5</sup> Published studies describing patient navigator services are mostly single centre and single disease cohort studies, with non-randomized designs, thus, limiting generalizability to other health jurisdictions and disease populations.<sup>5</sup> Further, interventions requiring highly skilled health care workers tend to be expensive, and to justify such an intervention, a cost evaluation is necessary. To address these challenges we designed a pragmatic RCT, the Transition Navigator Trial (TNT), the protocol for which is described in this paper.

### Trial Objectives

The primary objective is to evaluate the impact of a personalized transition to adult care intervention (access to a patient navigator) compared to usual care for 16-21 year olds living with chronic health conditions who are transferring to adult care with respect to: a) ER/urgent care visits (*primary outcome*); and b) inpatient and ambulatory care utilization, transition readiness scores, and patient-reported health status (*secondary outcomes*). Secondary objectives are: a) to determine the net health care cost impact attributable to the patient navigator intervention; and b) to obtain perceptions of stakeholders regarding the role of patient navigators in reducing barriers to adult-oriented ambulatory care.

### Hypotheses

The patient navigator intervention will reduce all-cause ER/urgent care visit rates, improve transition readiness scores and patient-reported health status, and generate cost savings for the health system.

## METHODS AND ANALYSIS

This study will be conducted in accordance with the SPIRIT checklist<sup>6-8</sup> and CONSORT statement on pragmatic trial extension<sup>9</sup> (RCT), and COREQ.<sup>10,11</sup> Ethics approval was obtained from the University of Calgary Conjoint Health Research Ethics Board (REB #162561) and the University of Alberta Health Research Ethics Board (Pro00077325).

### Study Design and Setting

This study will use a parallel group, pragmatic RCT<sup>9</sup> design (Figures 1 and 2) with an embedded qualitative study. The RCT involves random allocation of young adults (ages 16 to 21 years) with a chronic medical/mental health condition to either a personalized transition intervention (access to a patient navigator) or usual transitional care at one of three tertiary care pediatric hospitals in

1  
2  
3 Alberta, Canada.  
4

5 Alberta, with a population of 4.1 million, has a universal publicly funded health care system that  
6 covers over 99% of the population.<sup>12</sup> Patients will be recruited from 3 tertiary care pediatric  
7 hospitals: the Stollery Children's Hospital, Alberta Children's Hospital, and Glenrose  
8 Rehabilitation Hospital.  
9

## 10 11 **Recruitment**

12  
13 Eligible participants will be identified from 41 pediatric specialty clinics at the 3 participating  
14 hospitals (Figure 3). These clinics were selected after extensive stakeholder input, as these patient  
15 groups have high potential for adverse outcomes if transitions are not managed optimally.<sup>4,12-15</sup>  
16 Participants will have chronic health conditions in these broad categories: endocrine,  
17 gastrointestinal, neurologic, neurodevelopmental, rheumatologic, renal, cardiac, hematologic,  
18 respiratory, and metabolic/genetic. The primary caregiver (legal guardian or parent) of the young  
19 adult will also be considered a study participant if he/she is willing; however, parent/guardian  
20 involvement is not a requirement. Primary caregiver will also provide information required for  
21 the study should the patient be non-verbal or lack capacity to participate in the study.  
22  
23

24  
25 Potentially eligible participants will be recruited through various methods including: 1) clinic staff  
26 identifying potential participants and requesting consent to contact by the study team, 2) patients  
27 can directly self-refer using a generic study email or phone number provided in recruitment  
28 posters, and 3) using mail-outs to potentially eligible participants who have used health services  
29 at the participating hospitals.  
30

31  
32 Trained research assistants are responsible for responding to any queries for enrollment via  
33 telephone or email. These research assistants are also responsible for screening potential  
34 participants for eligibility. The screening process is being conducted in person or by phone.  
35

## 36 37 **Inclusion criteria**

38  
39 To be eligible, participants must: (1) be between 16 and 21 years of age at the time of enrollment,  
40 (2) be receiving care from at least one of the selected pediatric outpatient hospital and community  
41 clinics (Figure 3), (3) have a chronic medical condition (defined as conditions which are >3 months  
42 in duration and/or lifelong with multiple morbidities and/or multi-organ/system manifestations or  
43 conditions which typically affect a single organ/system)<sup>16,17</sup> and (4) be expected to be transferred  
44 to adult specialty care in the next 12 months.  
45  
46

## 47 48 **Exclusion criteria**

49  
50 Exclusion criteria will be: (1) enrolled in another transition-related study involving a navigator or  
51 similar intervention; (2) transfer will not occur during the time interval for the study; (3) will be  
52 moving out of Alberta during the study (e.g., going away for college) resulting in inability to report  
53 on primary outcome (ER visits) within the province; (4) inability to read and write in English.  
54  
55  
56  
57

## Consent

Informed written consent will be obtained from all participants prior to enrollment. For patients who are minors (age 16-17), informed assent will be obtained where appropriate. When the patient is considered a mature minor (after a capacity assessment by the responsible physician) or at age 18, we will obtain consent. If a patient is consenting for him/herself, then consent forms will ask participants for permission to contact their parents/guardians as needed to facilitate care, and also for permission to disclose medical information to parents/guardians. Should the participant decline parent involvement in the study, parents will not be contacted nor will health information be provided to the parent.

The primary caregiver will consent for his/her own respective participation. Primary caregivers will also consent on behalf of young adult participants who lack capacity to do so themselves due to developmental delay. Consent for disclosure of personal health numbers (PHN) assigned by Alberta Health for universal health care access will be obtained, to allow examination of health service utilization at the patient level by linkage to administrative health datasets.

Participation will be voluntary and participants will be free to withdraw at any time. A small incentive will be offered to participants (\$25 at enrollment and \$25 at study end), as a token of appreciation of their participation.

## Study Timeline

Participants will be recruited over ~42 months. Recruitment started in January 2018, and will continue until target enrolment is reached. The duration of navigator support for participants in the intervention arm will be up to 24 months after randomization, and a minimum of 12 months for those enrolled later in the recruitment period. All participants will be observed for a minimum of 12, and maximum of 42 months. See timeline in Figure 4. A schematic diagram outlining the schedule of enrolment, assessments, and visits is shown in Table 1.

| Form                        | Screening | Enrollment | Randomi-<br>zation | Baseline | Repeat-<br>able | Months Post-Randomization |   |   |    |    |    |    |    |  |
|-----------------------------|-----------|------------|--------------------|----------|-----------------|---------------------------|---|---|----|----|----|----|----|--|
|                             |           |            |                    |          |                 | 3                         | 6 | 9 | 12 | 15 | 18 | 21 | 24 |  |
| CONSENT -<br>Participant    | X         |            |                    |          |                 |                           |   |   |    |    |    |    |    |  |
| CONSENT -<br>Caregiver      | X         |            |                    |          |                 |                           |   |   |    |    |    |    |    |  |
| ASSENT -<br>Participant     | X         |            |                    |          |                 |                           |   |   |    |    |    |    |    |  |
| Screening Form              | X         |            |                    |          |                 |                           |   |   |    |    |    |    |    |  |
| Participant<br>Demographics |           | X          |                    |          |                 |                           |   |   |    |    |    |    |    |  |
| Caregiver<br>Demographics   |           | X          |                    |          |                 |                           |   |   |    |    |    |    |    |  |
| Contact<br>Information      |           | X          |                    |          |                 |                           |   |   |    |    |    |    |    |  |
| Baseline Medical            |           | X          |                    |          |                 |                           |   |   |    |    |    |    |    |  |

|                              |  |  |   |   |   |  |   |   |   |   |   |   |   |
|------------------------------|--|--|---|---|---|--|---|---|---|---|---|---|---|
| Allocation                   |  |  | X |   |   |  |   |   |   |   |   |   |   |
| End of Study Form            |  |  |   |   |   |  |   |   |   |   |   |   | X |
| TRAQ 5.0                     |  |  |   | X |   |  | X |   | X |   | X |   | X |
| SF-12                        |  |  |   | X |   |  | X |   | X |   | X |   | X |
| Navigator Initial Encounter  |  |  |   | X |   |  |   |   |   |   |   |   |   |
| Navigator Encounter Form     |  |  |   |   | X |  |   |   |   |   |   |   |   |
| Navigator Critical Encounter |  |  |   |   | X |  |   |   |   |   |   |   |   |
| Navigator Review             |  |  |   |   |   |  | X | X | X | X | X | X | X |
| Fidelity Checklist           |  |  |   |   |   |  | X | X | X | X | X | X | X |
| Case Closure                 |  |  |   |   |   |  |   |   |   |   |   |   | X |
| Pre-Intervention Interview   |  |  |   | X |   |  |   |   |   |   |   |   |   |
| Post-Intervention Interview  |  |  |   |   |   |  |   |   |   |   |   |   | X |

Table 1: Schedule of assessments for participants in the trial. TRAQ: Transition Readiness Assessment Questionnaire, SF-12: Short-Form 12 Health Survey.

### Feasibility and Sample Size

There are approximately 600 prevalent patients between 16-18 years of age receiving care at each of the Alberta Children's Hospital and Stollery Children's Hospital. The Glenrose Rehabilitation Hospital has approximately 250 patients age 16-18 years. Estimated consent rate is 79% (based on our experience with transition trials).<sup>18,19</sup> We expect to recruit approximately 14-15 patients per month to reach our target sample size in 42 months. Clinic "champions" (physician, nurse or social worker leads) have been identified at all participating clinics to liaise with the study team and facilitate recruitment. A maximum case-load of 140-150 patients per patient navigator (one each in Edmonton and Calgary) is anticipated. This volume is considered feasible based on a similar case load of pediatric clinicians who have provided pediatric to adult transitional care in Alberta.

Sample size calculation was based on the primary outcome (i.e., ER/urgent care visit rate) during the period of observation. The baseline ER/urgent care visit rate observed within a diverse cohort of transitioning patients in Calgary, as identified using available administrative data, is 51 per 100 person years of follow-up, for age  $\geq 18$  years. Our team, composed of stakeholders from various levels of health service delivery, confirmed that a minimum clinically important difference between groups is a 20% (relative change) drop in ER visits. Based on effect size seen in a prior study evaluating transition navigators' impact on diabetic ketoacidosis admissions in diabetic patients,<sup>20</sup> we expect a 20-25% relative rate reduction in the intervention group compared to the control group. Assuming an ER/urgent care visit rate of 40 per 100 person years (21% rate reduction) in the intervention group, with significance level of  $\alpha = 0.05$  and 80% power, with an average follow-up of 2.04 years based on 24 months of recruitment and 36 months of maximum observation for outcomes, based on comparison between two Poisson rates, the needed sample size

1  
2  
3 in each arm is 300. Loss to follow-up will not affect our ability to measure the primary outcome,  
4 as we are using administrative health data. We have extended our recruitment time from 24 months  
5 to 42 months, in response to slow recruitment at the beginning of the study.  
6  
7

## 8 **Allocation and Blinding**

9

10 Participants will be randomly allocated after consent to either the patient navigator intervention or  
11 usual care in a 1:1 ratio using a computer-stratified generated randomization sequence, generated  
12 a priori by a statistician (author ANA) with varying block sizes, stratified by primary clinic  
13 affiliation. Randomization scheme will be executed in REDCap research software.<sup>21</sup> Study  
14 coordinators at each site ascertain group allocation by clicking 'randomize' on REDCap, and  
15 inform participants of their assigned study arm.  
16  
17

18 Intervention assignment will not be blinded from trial participants, family members, research  
19 assistants, or clinical teams. All patients/family participants will be blinded to the primary outcome  
20 (ER/urgent care visit) and hypothesized effects of the study. The navigators will not be blinded to  
21 the primary hypothesis. Full details of the navigator intervention will not be available to clinic  
22 staff/control participants to minimize contamination of the intervention to the control group. Data  
23 analysts will be blinded to group allocation and the nature of the intervention.  
24  
25  
26

## 27 **Study Intervention**

28

29 There will be one navigator in each of Calgary and Edmonton serving approximately 150  
30 participants. These navigators are employees of Alberta Health Services (AHS), the organization  
31 that provides government-funded health care to >99% of Alberta residents. Individuals eligible for  
32 the patient navigator position will have a minimum of a Bachelor's degree in Social Work and 5  
33 years of clinical experience, including experience working with adolescents and/or young adults.  
34 The navigator will be familiar with resources and health services available within AHS and the  
35 community. The intervention group will also receive usual care.  
36  
37  
38

39 The intervention (personalized transition support, access to a patient navigator) is designed to  
40 overcome barriers and challenges experienced by transferring patients by facilitating a coordinated  
41 entry into the adult system, to increase appropriate use of adult-oriented ambulatory primary and  
42 specialty care, and reduce ER/urgent care visits (primary outcome).<sup>22,23</sup> We developed a structured  
43 navigator intervention with four distinct inter-related modules based on literature highlighting the  
44 need for each<sup>5</sup>, our pre-trial qualitative findings<sup>24</sup>, and in collaboration with content experts in  
45 transition models, partners in Alberta Health Services, and patient/parent advisory committees.  
46 We also developed a 2-day training program for the navigators to complete prior to start of the  
47 trial. The training consists of readings, case scenarios, and role plays. The modules are:  
48  
49

- 50 • **Module 1 Prepare for transfer of care**<sup>25-28</sup> complete needs, risk and transition readiness  
51 assessments using a structured approach with modified SSHADESS psychosocial assessment<sup>29</sup>  
52 (see supplementary material); create medical passport; help establish relationships with  
53 primary care providers and appropriate specialty care providers; and enable timely attendance  
54 at first adult clinic visit.
- 55 • **Module 2 Navigator as a health system broker**<sup>30-32</sup>: assist with data sharing between  
56  
57

1  
2  
3 pediatric and adult service providers; work with patient and primary care providers to facilitate  
4 continuity of care; promote communication, collaboration, and patient and family centered  
5 care between all providers; and advocate with/for patient/family.

- 6 • **Module 3 Social determinants of health**<sup>33-35</sup>: assist families with barriers related to social and  
7 economic determinants of health to reduce modifiable barriers to accessing ambulatory  
8 medical care after transfer.
- 9 • **Module 4 Promote self-management of medical conditions**<sup>36-39</sup>: provide information and  
10 access to tools, educational resources, and peer support groups; track follow-up clinic visits,  
11 medication refills and laboratory testing in order to flag non-adherence early and provide  
12 coaching to reduce barriers to adherence; and plan for medical and/or mental health crisis  
13 management.
- 14
- 15
- 16

17  
18 Once a participant is randomized to the intervention group, the navigators will contact the  
19 participant within 7 days to schedule a face-to-face (or phone meeting if necessary for rural  
20 dwelling patients) meeting during which the navigator will complete tasks in Module 1. Using  
21 information obtained at this initial assessment, the navigators will use an adaptive<sup>40</sup>, patient-  
22 centered approach that customizes delivery of services based on needs of the patient, and consistent  
23 with principles and practice outlined in Modules 2-4. Navigators will use telephone, text messages,  
24 email messages, and in-person visits to maintain contact with participants as needed during the  
25 course of the intervention. Navigators will be alerted to ER/urgent care visits of participants by  
26 either the participants, caregivers (if appropriate), clinical providers, or through use of electronic  
27 medical record alerts. The navigator will review circumstances related to ER/urgent care visits,  
28 and inform preventative actions based on the intervention modules. Scheduled patient reviews (in  
29 person, or by telephone contact) will occur every 3 months (see Schedule of Assessments, Table  
30 1). The navigators will record every contact and nature of assistance provided using standardized  
31 forms.

32  
33  
34  
35

### 36 Fidelity

37  
38 Procedures for monitoring adherence to intervention fidelity by the navigators will be managed by  
39 the Operational Oversight Committee (investigators, policy makers, navigator's supervisors), and  
40 its role will be to assess and enhance fidelity to the intervention throughout the trial. The committee  
41 will review the patient navigator intervention using qualitative interviews of stakeholders and  
42 participants after the first 5 participants are enrolled into the intervention arm in each site. The  
43 knowledge gained from the review will be utilized to optimize the intervention protocol and  
44 address barriers to intervention fidelity across all sites.

45  
46

47 Deviations will be carefully documented by navigators during their course of the trial. The  
48 navigators will complete a standardized fidelity checklist at the end of each patient encounter to  
49 assess their adherence to skills, interventions and pathways described in the intervention modules  
50 (Supplementary Material). Concomitant interventions which duplicate the intervention in whole  
51 or in part will be not be permitted during the trial.

52  
53

54 **Usual care group:** Participants assigned to the usual care group will receive care as available  
55 within adult and pediatric clinics and the health region. However, this group is *not* a 'no  
56 intervention' group; in addition to care provided by their clinical teams, the study team will  
57

1  
2  
3 provide usual care participants with information in the form of infographics and quarterly  
4 newsletters, regarding transition to adult care resources such as young-adult oriented transition  
5 websites, self-management tools, and the opportunity to attend transition-focused workshops.  
6 Significant variation in transitional care is expected in this group within and across sites (based  
7 on our prior stakeholder engagement work).  
8  
9

10 To minimize attrition, all participants in the intervention and usual care group will receive  
11 electronic newsletters every 4 months, letters thanking them for their participation to date and  
12 email and phone reminders for follow-up data collection.  
13

## 14 **Outcome and outcome measures**

15  
16  
17 Outcome measures and the assessment schedule are summarized in Table 1. The primary outcome  
18 is the rate of all-cause ER and urgent care visits during the observation period. Patients, providers,  
19 and policy makers on our team considered ER/urgent care visits to be relevant, and measureable  
20 in a blinded fashion across all clinical groups. We will obtain consent from trial participants to  
21 use their personal health numbers to link with health service utilization data. All ER and urgent  
22 care visits attributed to participants will be obtained from the National Ambulatory Care Reporting  
23 System<sup>41</sup>, and the Clinical Analytics Team of AHS will conduct all analysis. AHS is the custodian  
24 of all Alberta Health data for >99% of population.  
25  
26

27 We will evaluate ambulatory and inpatient care utilization measures as secondary outcomes  
28 (primary care visits, specialty care ambulatory care visits, in-patient admissions, ICU admissions, and  
29 length of hospital stay). Outcome measure will be the rate of events. This data will be obtained  
30 from the Canadian Institute for Health Information Discharge Abstract Database<sup>42</sup>, and physician  
31 billing claims database<sup>43</sup>.  
32  
33

34 Other secondary outcomes are the Transition Readiness Assessment Questionnaire (TRAQ), and  
35 patient reported health status as measured by the 12-Item Short Form Health Survey (SF-12). The  
36 TRAQ is the best-validated transition readiness scale for adolescents<sup>44,45</sup>. The questionnaire  
37 consists of 29 items, at grade 5.7 reading level, and takes ~5 minutes to complete. Participants will  
38 complete the TRAQ online at baseline, 6, 12, 18 and 24 months. Regarding general health,  
39 participants will complete the 12-Item Short Form Health Survey (SF-12) which is a validated 12  
40 item survey that measures self-reported health status in individuals >14 years of age.<sup>46</sup> The survey  
41 includes questions concerning physical functioning, role limitations because of physical health  
42 problems, bodily pain, general health perceptions, vitality (energy/fatigue), social functioning, role  
43 limitations because of emotional problems, and general mental health (psychological distress and  
44 psychological well-being). Participants will complete the SF-12 at baseline, 6, 12, 18 and 24  
45 months.  
46  
47  
48

49 We will prospectively capture the cost of the navigator intervention using micro-costing methods<sup>47</sup>  
50 (identification, measurement, and valuation) that include one time and ongoing costs (development  
51 of materials, capital costs, wage rates for navigators, number of patients in caseload), enabling  
52 estimation of the cost of this intervention per patient served, using high quality administrative  
53 datasets from the AHS Clinical Analytics data repository.<sup>48</sup>  
54  
55  
56  
57  
58  
59  
60

## Data monitoring and trial management

The trial protocol is registered at [www.clinicaltrials.gov](http://www.clinicaltrials.gov) (NCT03342495). The trial is governed by multiple stakeholder groups, including clinicians and policy makers at each of the recruiting sites, study team members, and youth and family members. The Executive Trial Team is composed of the principal investigators and research team members, as well as site representatives and a patient representative. The team is supported by the larger Trial Management Committee, Operational Oversight Committee, Data Safety Monitoring Board (DSMB), Patient and Family Advisory Council and Scientific Advisory Board. A governance chart is provided in Figure 5.

Potential adverse events will be monitored in both study groups, however, the intervention is considered to be of minimal risk. No interim analysis is planned. The DSMB consists of 3 individuals who are familiar with the patient population and study question, but unfamiliar with the research team. The board will meet at least twice a year and monitor the trial in terms of safety of the participants and rigor of the data collection procedures.

## Analytical Plan

All analyses will be intention-to-treat. We will use Poisson regression to compare rates of ER/urgent care visits between the navigator and usual control groups, with fixed as well as random effects per site, and random effect by primary clinic. Demographic and medical characteristics that could be potential confounders or independent risk factors (e.g. age, primary disease, socioeconomic status, location of residence, medical and mental health co-morbidity in participant, ethnicity, immigrant status, demographic characteristics and medical/mental health of parents/caregivers obtained with consent) will be collected *a priori*, and used for adjusting the Poisson model. All other health utilization outcomes will be analyzed using descriptive statistical methods and by key demographic variables. For TRAQ and SF-12 scores we will assess the effect of time (baseline, 6, 12, 18 and 24 months) on the scores using linear regression with random effects for subject and clinic.

For the economic evaluation, we will use established methods to enable comparisons of mean costs, as these are easily interpretable and relevant to health care payer. We will include the full cost of the navigator intervention (for intervention group) and the health care cost categories noted above and will use non-parametric bootstrap estimates to derive 95% confidence interval and mean cost differences between the treatment arms.<sup>49,50</sup> We will use 1000 bias-corrected bootstrap replications (including sampling with replacement from the original data) to estimate the distribution of a sampling statistic to derive 95% confidence intervals.<sup>49</sup> We will also compare cost by category (in-patient, ER, ambulatory care, physician claims) between both groups.

## Qualitative data analysis

All interviews and focus groups will be audio-taped and transcribed verbatim, and NVivo software (QSR International Pty Ltd., Version 10, 2012) will be used for analysis. Thematic analysis will be used to extrapolate and systematically analyze patterns in the data generated by the qualitative interviews.<sup>50</sup> We will closely adhere to the steps delineated by Braun and Clarke<sup>51</sup> for conducting thematic analysis. We will use Krueger and Casey's<sup>52</sup> constant comparative method of analysis to



1  
2  
3 analyze the focus group data. This method involves “cutting, sorting, and arranging through  
4 comparing and contrasting.” The coding process consists of grouping similar concepts and ideas,  
5 while identifying themes and categorizing results. The research team will engage in established  
6 steps to increase the validity, credibility, transferability, and dependability of findings by adhering  
7 to guidelines for publication of qualitative research studies.<sup>53</sup>  
8  
9

## 10 **Confidentiality**

11  
12  
13 The RCT and qualitative studies will adhere to the Personal Health Information Protection Act and  
14 all other regulatory and organizational standards for privacy, confidentiality and security of  
15 database information. All patient-identifiable electronic data will be stored in password protected  
16 encrypted files on a secure network. Any identifiable information stored on REDCap will only be  
17 accessed by the investigative team and will be de-identified in the data export prior to analysis. All  
18 identifying information stored on paper will be stored in locked cabinets.  
19  
20

## 21 **Dissemination**

22  
23 We have used an integrated knowledge translation approach.<sup>54,55</sup> Our team is comprised of patient  
24 representatives, researchers, clinical service providers and senior policy makers who are  
25 committed to improving transition and transfer of care within Alberta. At the end of the study, we  
26 will conduct face to face stakeholder meetings to develop a holistic understanding of the barriers  
27 and facilitators to transitional care and the effectiveness of the patient navigator service using both  
28 quantitative and qualitative data obtained in this study.  
29  
30

## 31 **Discussion**

32  
33  
34 The Transition Navigator Trial is a unique pragmatic population based trial which will address a  
35 significant gap in knowledge in the area of transition to adult care. The study will overcome  
36 previous methodological limitations including small sample sizes, non-generalizability due to  
37 diagnosis- specific inclusion criteria, and non- randomized designs. The results will have the  
38 potential to change health care delivery, improve health outcomes, and enhance experiences of  
39 young adults transitioning to adult care. The study will also provide a better understanding of the  
40 barriers and facilitators to transitional care and the effectiveness of the patient navigator service  
41 using both quantitative and qualitative data. We will determine what elements of the navigator  
42 service are most beneficial to participants, and whether the intervention is cost saving.  
43  
44

45  
46 The evidence base for health care interventions during transition to adult care is limited by a  
47 paucity of data from controlled studies. Various interventions have been described and tested to a  
48 limited extent, mostly using non-randomized designs. Most are single centre, single disease  
49 studies, with limited generalizability. Gabriel *et al.*<sup>5</sup> performed a systematic review of evidence  
50 focused on transition interventions. They report that structured transition interventions led to  
51 improvement in patient reported quality of life and perceived health status in several studies,  
52 suggesting potential publication bias. No studies have found significant cost savings; several  
53 studies found that having a structured transition process resulted in increased visits to the new  
54 adult provider, and a reduced time lag between the last pediatric visit and the first adult visit<sup>stein</sup><sup>56</sup>  
55  
56  
57  
58  
59  
60

1  
2  
3 The current study will be aligned with the Triple Aim Framework for health service evaluation<sup>57</sup>.  
4 Interventions requiring highly skilled health care workers tend to be expensive, and to justify such  
5 an intervention, a cost evaluation is necessary. Complex interventions require assessment of  
6 fidelity to examine whether the intervention was delivered as intended, including a description of  
7 the interventions. This study will address these challenges.  
8  
9

10 In conclusion, this pragmatic RCT will evaluate the impact of a patient navigator service on rates  
11 of urgent care/ER visits and will provide patient, family and provider perceptions of the  
12 transition experience and the navigator service. This study will provide urgently needed data to  
13 guide pediatric and adult health care providers and policy makers regarding optimal transitional  
14 care delivery.  
15  
16  
17  
18

### 19 **Acknowledgements:**

20 We would like to acknowledge Sarah Gil for the creation of the figures used in this paper.  
21  
22  
23  
24  
25  
26  
27  
28  
29  
30  
31  
32  
33  
34  
35  
36  
37  
38  
39  
40  
41  
42  
43  
44  
45  
46  
47  
48

### 49 **REFERENCES**

- 50  
51  
52  
53 1. Kaufman M, Pinzon J. Transition to Adult Care for Youth with Special Health Care Needs.  
54 *Paediatr Child Health*. 2007;12(9):785-788.  
55 2. Bloom SR, Kuhlthau K, Van Cleave J, Knapp AA, Newacheck P, Perrin JM. Health Care Transition  
56 for Youth With Special Health Care Needs. *Journal of Adolescent Health*. 2012;51(3):213-219.  
57  
58  
59  
60

3. Van Wallegghem N, Macdonald CA, Dean HJ. Evaluation of a Systems Navigator Model for Transition from Pediatric to Adult Care for Young Adults with Type 1 Diabetes. *Diabetes Care*. 2008;31(8):1529-1530.
4. Prestidge C, Romann A, Djurdjev O, Matsuda-Abedini M. Utility and cost of a renal transplant transition clinic. *Pediatric nephrology (Berlin, Germany)*. 2012;27(2):295-302.
5. Gabriel P, McManus M, Rogers K, White P. Outcome Evidence for Structured Pediatric to Adult Health Care Transition Interventions: A Systematic Review. *J Pediatr*. 2017;188:263-269 e215.
6. Chan AW, Tetzlaff JM, Altman DG, Dickersin K, Moher D. SPIRIT 2013: new guidance for content of clinical trial protocols. *Lancet (London, England)*. 2013;381(9861):91-92.
7. Chan AW, Tetzlaff JM, Altman DG, et al. SPIRIT 2013 statement: defining standard protocol items for clinical trials. *Annals of internal medicine*. 2013;158(3):200-207.
8. Chan AW, Tetzlaff JM, Gotzsche PC, et al. SPIRIT 2013 explanation and elaboration: guidance for protocols of clinical trials. *Bmj*. 2013;346:e7586.
9. Zwarenstein M, Treweek S, Gagnier JJ, et al. Improving the reporting of pragmatic trials: an extension of the CONSORT statement. *BMJ*. 2008;337:a2390.
10. Tong A, Sainsbury P, Craig J. Consolidated criteria for reporting qualitative research (COREQ): a 32-item checklist for interviews and focus groups. *International Journal for Quality in Health Care*. 2007. Volume 19, Number 6: pp. 349 – 357
11. Network TE. Enhancing the Quality and Transparency Of health Research. <https://www.equator-network.org>
12. Bindels-de Heus KGCB, van Staa A, van Vliet I, Ewals FVPM, Hilberink SR. Transferring Young People With Profound Intellectual and Multiple Disabilities From Pediatric to Adult Medical Care: Parents' Experiences and Recommendations. *Intellectual and Developmental Disabilities*. 2013;51(3):176-189.
13. Foster BJ, Dahhou M, Zhang X, Platt RW, Samuel SM, Hanley JA. Association between age and graft failure rates in young kidney transplant recipients. *Transplantation*. 2011;92(11):1237-1243.
14. Samuel SM, Nettel-Aguirre A, Hemmelgarn BR, et al. Graft Failure and Adaptation Period to Adult Healthcare Centers in Pediatric Renal Transplant Patients. *Transplantation*. 2011;91(12):1380-1385 1310.1097/TP.1380b1013e31821b31822f31824b.
15. Yeung E, Kay J, Roosevelt GE, Brandon M, Yetman AT. Lapse of care as a predictor for morbidity in adults with congenital heart disease. *International journal of cardiology*. 2008;125(1):62-65.
16. Cohen E, Gandhi S, Toulany A, et al. Health Care Use During Transfer to Adult Care Among Youth With Chronic Conditions. *Pediatrics*. 2016;137(3):e20152734.
17. Sevick MA, Trauth JM, Ling BS, et al. Patients with Complex Chronic Diseases: perspectives on supporting self-management. *Journal of general internal medicine*. 2007;22 Suppl 3:438-444.
18. Mackie AS, Islam S, Magill-Evans J, et al. Healthcare transition for youth with heart disease: a clinical trial. *Heart (British Cardiac Society)*. 2014;100(14):1113-1118.
19. Mackie AS, Rempel GR, Kovacs AH, et al. A cluster randomized trial of a transition intervention for adolescents with congenital heart disease: rationale and design of the CHAPTER 2 study. *BMC cardiovascular disorders*. 2016;16:127.
20. Holmes-Walker D, Llewellyn A, Farrell K. A transition care programme which improves diabetes control and reduces hospital admission rates in young adults with Type 1 diabetes aged 15–25 years. *Diabetic medicine*. 2007;24(7):764-769.
21. Paul A. Harris, Robert Taylor, Robert Thielke, Jonathon Payne, Nathaniel Gonzalez, Jose G. Conde, Research electronic data capture (REDCap) – A metadata-driven methodology and workflow process for providing translational research informatics support, *J Biomed Inform*. 2009 Apr;42(2):377-81

- 1
- 2
- 3
- 4 22. Betz CL, Redcay G. Dimensions of the transition service coordinator role. *Journal for specialists in pediatric nursing : JSPN*. 2005;10(2):49-59.
- 5
- 6 23. Betz CL, Redcay G. Lessons learned from providing transition services to adolescents with special health care needs. *Issues in comprehensive pediatric nursing*. 2002;25(2):129-149.
- 7
- 8 24. Dimitropoulos, G., Morgan-Maver, E., \*Allemang, B., \*Schraeder, K., Scott, S., Pinzon, J., Andrew, G., Guilcher, G., Hamiwka, L., Klarenbach, S., Lang, E., McBrien, K., Nettel-Aguirre, A., Pacaud, D., Zwaigenbaum, L., Mackie, A., & Samuel, S. Health care stakeholder perspectives regarding the role of a patient navigator during transition to adult care. *BMC Health Services Research*. Accepted June 6, 2019
- 9
- 10
- 11
- 12
- 13 25. Cooley WC, Sagerman PJ. Supporting the health care transition from adolescence to adulthood in the medical home. *Pediatrics*. 2011;128(1):182-200.
- 14
- 15 26. van Staa A, van der Stege HA, Jedeloo S, Moll HA, Hilberink SR. Readiness to transfer to adult care of adolescents with chronic conditions: exploration of associated factors. *The Journal of adolescent health : official publication of the Society for Adolescent Medicine*. 2011;48(3):295-302.
- 16
- 17
- 18
- 19
- 20 27. McManus M, White P. Transition to Adult Health Care Services for Young Adults with Chronic Medical Illness and Psychiatric Comorbidity. *Child and adolescent psychiatric clinics of North America*. 2017;26(2):367-380.
- 21
- 22
- 23 28. BC Children's Hospital. Transition to Adult Care.  
24 <http://www.bcchildrens.ca/Services/SpecializedPediatrics/YouthHealth/Resources.htm>.
- 25
- 26 29. American Academy of Pediatrics. Reaching Teens Strength-Based Communication Strategies To Build Resilience and Support Healthy Adolescent Development. Ginsburg KR, Kinsman SB, editors: American Academy of Pediatrics; 2014. 635 p.
- 27
- 28
- 29 30. Coyne B, Hallowell SC, Thompson M. Measurable Outcomes After Transfer From Pediatric to Adult Providers in Youth With Chronic Illness. *The Journal of adolescent health : official publication of the Society for Adolescent Medicine*. 2017;60(1):3-16.
- 30
- 31
- 32 31. Suris J-C, Akre C, Rutishauser C. How Adult Specialists Deal with the Principles of a Successful Transition. *Journal of Adolescent Health*. 2009;45(6):551-555.
- 33
- 34 32. Lipstein EA, Muething KA, Dodds CM, Britto MT. "I'm the one taking it": adolescent participation in chronic disease treatment decisions. *The Journal of adolescent health : official publication of the Society for Adolescent Medicine*. 2013;53(2):253-259.
- 35
- 36 33. Ravani P, Bonanni A, Rossi R, Caridi G, Ghiggeri GM. Anti-CD20 Antibodies for Idiopathic Nephrotic Syndrome in Children. *Clin J Am Soc Nephrol*. 2016;11(4):710-720.
- 37
- 38 34. Cramm JM, Strating MM, Sonneveld HM, Nieboer AP. The Longitudinal Relationship Between Satisfaction with Transitional Care and Social and Emotional Quality of Life Among Chronically Ill Adolescents. *Applied research in quality of life*. 2013;8:481-491.
- 39
- 40 35. Grant C, Pan J. A comparison of five transition programmes for youth with chronic illness in Canada. *Child: care, health and development*. 2011;37(6):815-820.
- 41
- 42 36. Williams T, Sherman EMS, Mah JK, et al. Measurement of medical self-management and transition readiness among Canadian adolescents with special health care needs. *International Journal of Child and Adolescent Health* 2010;3(4):527-535.
- 43
- 44 37. Akre C, Suris JC. From controlling to letting go: what are the psychosocial needs of parents of adolescents with a chronic illness? *Health education research*. 2014;29(5):764-772.
- 45
- 46 38. McGrady ME, Hommel KA. Medication adherence and health care utilization in pediatric chronic illness: a systematic review. *Pediatrics*. 2013;132(4):730-740.
- 47
- 48 39. Maslow GR, Chung RJ. Systematic review of positive youth development programs for adolescents with chronic illness. *Pediatrics*. 2013;131(5):e1605-1618.
- 49
- 50
- 51
- 52
- 53
- 54
- 55
- 56
- 57
- 58
- 59
- 60

- 1
- 2
- 3
- 4 40. Almirall D, Chronis-Tuscano A. Adaptive Interventions in Child and Adolescent Mental Health. *J Clin Child Adolesc Psychol*. 2016;45(4):383-395.
- 5
- 6 41. Canadian Institute for Health Information. National Ambulatory Care Reporting System Metadata. <https://www.cihi.ca/en/national-ambulatory-care-reporting-system-metadata>
- 7
- 8 42. Canadian Institute for Health Information. Discharge Abstract Database. Data Elements 2018-2019. <https://www.cihi.ca/sites/default/files/document/dad-data-elements-2018-en-web.pdf>
- 9
- 10 43. Canadian Institute for Health Information. National Physician Database Data Release, 2015–2016: Methodological Notes. Ottawa, ON: CIHI; 2017
- 11
- 12 44. Sawicki GS, Lukens-Bull K, Yin X, Demars N, Huang IC, Livingood W, et al. Measuring the Transition Readiness of Youth with Special Healthcare Needs: Validation of the TRAQ—Transition Readiness Assessment Questionnaire. *Journal of Pediatric Psychology*. 2011;36(2):160-71
- 13
- 14
- 15
- 16
- 17 45. Zhang et al. *BMC Pediatrics* 2014, 14:4. <http://www.biomedcentral.com/1471-2431/14/4>
- 18 46. Ware J, Jr., Kosinski M, Keller SD. A 12-Item Short-Form Health Survey: construction of scales and preliminary tests of reliability and validity. *Med Care*. 1996;34(3):220-233.
- 19
- 20 47. Gold MR, Siegel, J., Russell, L.B., et al. . *Cost Effectiveness in Health and Medicine*. . New York: Oxford University Press; 1996.
- 21
- 22 48. McBrien KA, Manns BJ, Chui B, et al. Health care costs in people with diabetes and their association with glycemic control and kidney function. *Diabetes Care*. 2013;36(5):1172-1180.
- 23
- 24 49. Desgagne A, Castilloux AM, Angers JF, LeLorier J. The use of the bootstrap statistical method for the pharmaco-economic cost analysis of skewed data. *Pharmacoeconomics*. 1998;13(5 Pt 1):487-497.
- 25
- 26
- 27
- 28 50. Davison AC, Hinkley DV. *Bootstrap methods and their application*. Vol 1: Cambridge university press; 1997.
- 29
- 30 51. Braun V, Clarke V. Using thematic analysis in psychology. *Qualitative Research in Psychology*. 2006;3(2):77-101.
- 31
- 32 52. Krueger RAaC, M.A. *Focus groups: A Practical Guide for Applied Research*. 5 ed: Sage Publications; 2014.
- 33
- 34 53. Elliott R, Fischer CT, Rennie DL. Evolving guidelines for publication of qualitative research studies in psychology and related fields. *The British journal of clinical psychology*. 1999;38 (Pt 3):215-229.
- 35
- 36
- 37
- 38 54. Graham ID, Logan J, Harrison MB, et al. Lost in Knowledge Translation: Time for a Map? *J Contin Educ Health Prof*. 2006;26(1):13-24.
- 39
- 40 55. Straus SE, Tetroe J, Graham I. Defining Knowledge Translation. *CMAJ*. 2009;181(3-4):165-168.
- 41
- 42 56. Mackie AS, Rempel GR, Kovacs AH, Kaufman, M, Rankin KN, et al. Transition intervention for adolescents with congenital heart disease. *J Am Coll Cardiol*. 2018; 71(16):1768-1777.
- 43
- 44
- 45 57. Berwick DM, Nolan TW, Whittington J. The triple aim: care, health, and cost. *Health Affairs* 2008;27(3):759–69.
- 46
- 47
- 48
- 49
- 50
- 51
- 52
- 53
- 54
- 55
- 56
- 57
- 58
- 59
- 60

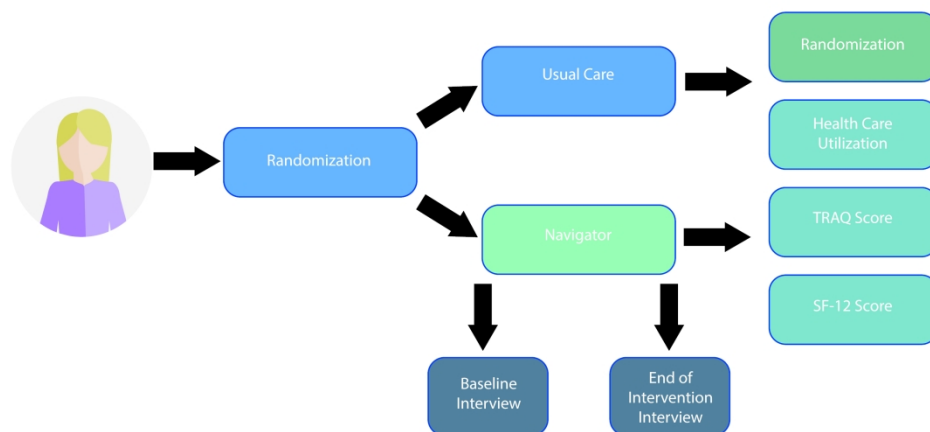

Figure 1 Trial Design

1  
2  
3  
4  
5  
6  
7  
8  
9  
10  
11  
12  
13  
14  
15  
16  
17  
18  
19  
20  
21  
22  
23  
24  
25  
26  
27  
28  
29  
30  
31  
32  
33  
34  
35  
36  
37  
38  
39  
40  
41  
42  
43  
44  
45  
46  
47  
48  
49  
50  
51  
52  
53  
54  
55  
56  
57  
58  
59  
60

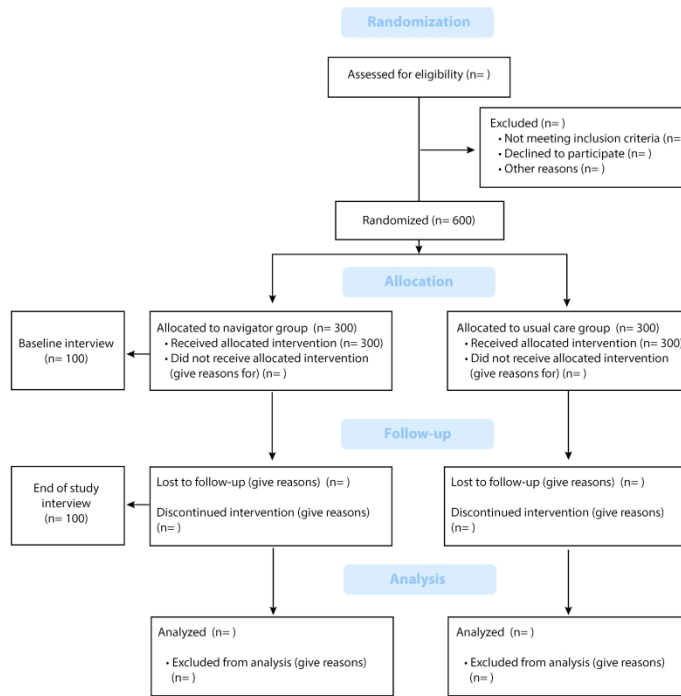

Figure 2 CONSORT Diagram

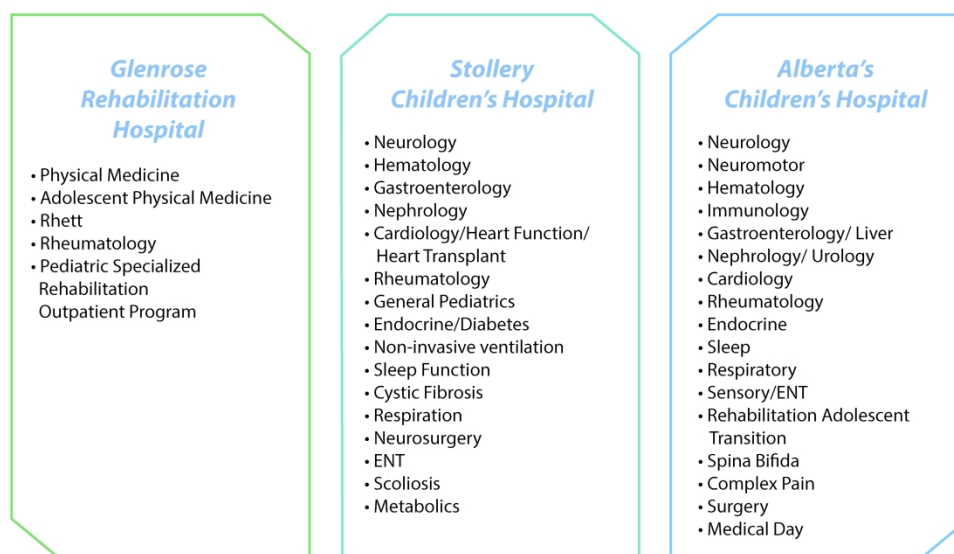

Figure 3 Participating Clinics



1  
2  
3  
4  
5  
6  
7  
8  
9  
10  
11  
12  
13  
14  
15  
16  
17  
18  
19  
20  
21  
22  
23  
24  
25  
26  
27  
28  
29  
30  
31  
32  
33  
34  
35  
36  
37  
38  
39  
40  
41  
42  
43  
44  
45  
46  
47  
48  
49  
50  
51  
52  
53  
54  
55  
56  
57  
58  
59  
60

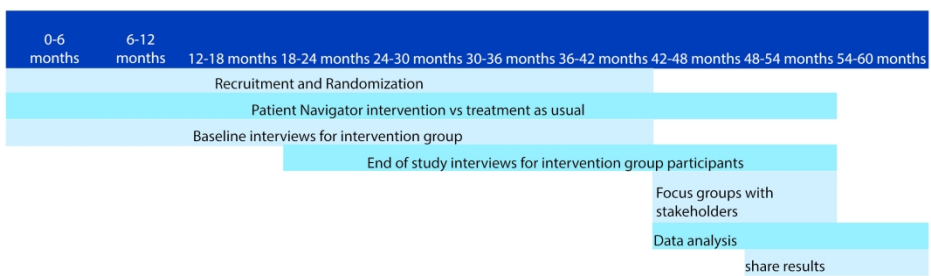

Figure 4 Study Timeline

1  
2  
3  
4  
5  
6  
7  
8  
9  
10  
11  
12  
13  
14  
15  
16  
17  
18  
19  
20  
21  
22  
23  
24  
25  
26  
27  
28  
29  
30  
31  
32  
33  
34  
35  
36  
37  
38  
39  
40  
41  
42  
43  
44  
45  
46  
47  
48  
49  
50  
51  
52  
53  
54  
55  
56  
57  
58  
59  
60

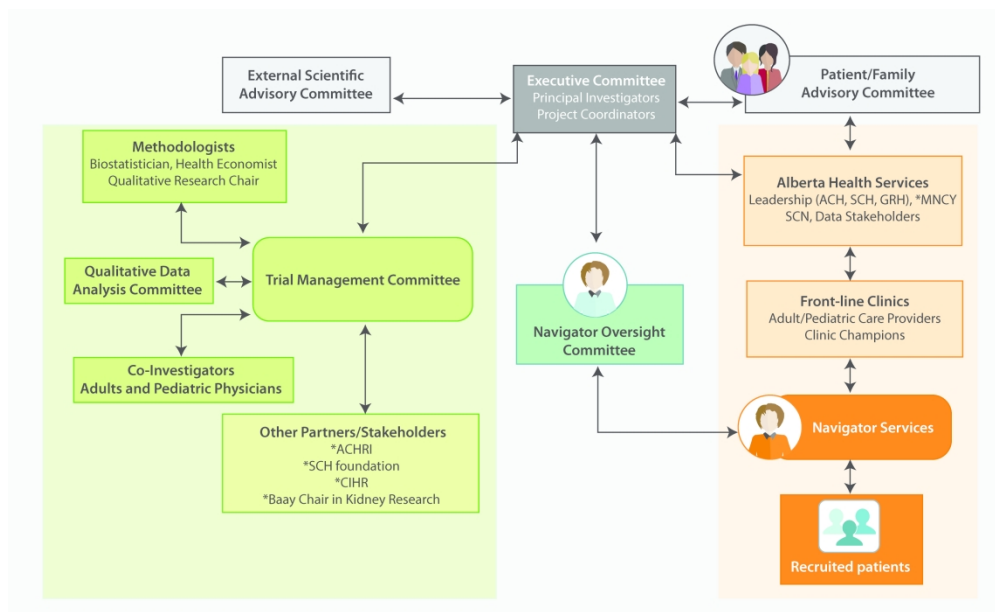

Figure: Governance of the Transition Navigator Trial. ACH: Alberta Children's Hospital; ACHRI: Alberta Children's Hospital Research Institute; GRH: Glenrose Rehabilitation Hospital; MNCY SCN: Maternal Newborn Child Youth Strategic Clinical Network; SCH: Stollery Children's Hospital

Figure 5. Trial Governance

## Supplementary Material

### Navigator Fidelity Checklist

#### Date of Transfers

In how many clinics is this participant being transferred?

- 1  
 2  
 3  
 4  
 5  
 6

#### Date of Reviews

Date of 3 Month Review \_\_\_\_\_ (YYYY-MM-DD)

Date of 6 Month Review \_\_\_\_\_ (YYYY-MM-DD)

Date of 9 Month Review \_\_\_\_\_ (YYYY-MM-DD)

Date of 12 Month Review \_\_\_\_\_ (YYYY-MM-DD)

Date of 15 Month Review \_\_\_\_\_ (YYYY-MM-DD)

Date of 18 Month Review \_\_\_\_\_ (YYYY-MM-DD)

Date of 21 Month Review \_\_\_\_\_ (YYYY-MM-DD)

Date of 24 Month Review \_\_\_\_\_ (YYYY-MM-DD)

#### Module 1: Preparing for transfer of care

|                                                                                                             | 3 month                  | 6 Month                  | 9 month                  | 12 month                 | 15 month                 | 18 month                 | 21 month                 | 24 month                 | N/A                      |
|-------------------------------------------------------------------------------------------------------------|--------------------------|--------------------------|--------------------------|--------------------------|--------------------------|--------------------------|--------------------------|--------------------------|--------------------------|
| Explained the ROLE of the navigation service                                                                | <input type="checkbox"/> |
| Discussed/provided RESOURCES on patient and family-centered care                                            | <input type="checkbox"/> |
| Completed psychosocial ASSESSMENTS (HEADSS, SSHADESS)                                                       | <input type="checkbox"/> |
| Completed a comprehensive TRANSITION PLAN                                                                   | <input type="checkbox"/> |
| Facilitated TRANSFER of medical and psychosocial DATA                                                       | <input type="checkbox"/> |
| Helped participant prepare succinct COMMUNICATION TOOLS (e.g., medical passport, 3 sentence health summary) | <input type="checkbox"/> |

|                                                                                                       |                          |                          |                          |                          |                          |                          |                          |                          |                          |
|-------------------------------------------------------------------------------------------------------|--------------------------|--------------------------|--------------------------|--------------------------|--------------------------|--------------------------|--------------------------|--------------------------|--------------------------|
| Assisted with SCHEDULING adult oriented medical appointments                                          | <input type="checkbox"/> |
| Assisted with ACCESSING RESOURCES/SERVICES within the community and/or adult-oriented health services | <input type="checkbox"/> |
| Helped participant find a FAMILY DOCTOR or primary care clinic                                        | <input type="checkbox"/> |

Comments:

---

**Module 2: Promote self-management**

|                                                                                                                                                                     | 3 month                  | 6 Month                  | 9 month                  | 12 month                 | 15 month                 | 18 month                 | 21 month                 | 24 month                 | N/A                      |
|---------------------------------------------------------------------------------------------------------------------------------------------------------------------|--------------------------|--------------------------|--------------------------|--------------------------|--------------------------|--------------------------|--------------------------|--------------------------|--------------------------|
| COACHED self-management skills and identified strategies to promote adherence to medical care plans (e.g., role play, checklists)                                   | <input type="checkbox"/> |
| Directed participant to TOOLS/RESOURCES to support self-management                                                                                                  | <input type="checkbox"/> |
| Worked with participant (also caregivers and providers as appropriate) to ADDRESS BARRIERS to adherence with medical care plans                                     | <input type="checkbox"/> |
| MONITORED ADHERENCE to medical care plans by direct report from participant (caregivers and/or providers as appropriate) or indirectly by reviewing medical records | <input type="checkbox"/> |
| Established PLAN to address medical CRISIS                                                                                                                          | <input type="checkbox"/> |

Comments:

---

**Module 3: Health systems broker**

|                                                       | 3 month                  | 6 Month                  | 9 month                  | 12 month                 | 15 month                 | 18 month                 | 21 month                 | 24 month                 | N/A                      |
|-------------------------------------------------------|--------------------------|--------------------------|--------------------------|--------------------------|--------------------------|--------------------------|--------------------------|--------------------------|--------------------------|
| Facilitated CONTINUITY OF CARE across adult providers | <input type="checkbox"/> |

|                                                                                  |                          |                          |                          |                          |                          |                          |                          |                          |                          |
|----------------------------------------------------------------------------------|--------------------------|--------------------------|--------------------------|--------------------------|--------------------------|--------------------------|--------------------------|--------------------------|--------------------------|
| Supported ongoing, appropriate ENGAGEMENT with health and mental health services | <input type="checkbox"/> |
| Advocated for timely and appropriate ACCESS to primary care and adult services   | <input type="checkbox"/> |

Comments:

---

#### Module 4: Social determinants of health

|                                                                                                                | 3 month                  | 6 Month                  | 9 month                  | 12 month                 | 15 month                 | 18 month                 | 21 month                 | 24 month                 | N/A                      |
|----------------------------------------------------------------------------------------------------------------|--------------------------|--------------------------|--------------------------|--------------------------|--------------------------|--------------------------|--------------------------|--------------------------|--------------------------|
| Identified SOCIO-ECONOMIC BARRIERS interfering with participant's adherence to medical care plans              | <input type="checkbox"/> |
| Helped participant find ADDITIONAL RESOURCES/PROGRAMS to address modifiable barriers related to service access | <input type="checkbox"/> |
| Assisted with educational, vocational, housing, and/or financial NEEDS for the participant                     | <input type="checkbox"/> |

Comments:

---

#### Supplementary Material 2: Initial encounter assessment template used by patient navigators

|                                                                                                                                                                                                                                              |
|----------------------------------------------------------------------------------------------------------------------------------------------------------------------------------------------------------------------------------------------|
| <b>Study ID</b>                                                                                                                                                                                                                              |
| <b>Family physician</b>                                                                                                                                                                                                                      |
| <b>Current pediatric specialists</b>                                                                                                                                                                                                         |
| <b>Pending adult specialists- list or summary</b>                                                                                                                                                                                            |
| <b>Other services (including mental health)</b>                                                                                                                                                                                              |
| <b>Community agencies currently involved in care</b>                                                                                                                                                                                         |
| <b>Medical status</b><br>-medical diagnoses and medical history summary<br>-psychiatric/mental health diagnoses<br>-neurodevelopmental diagnoses<br>-past surgical history<br>-medication summary<br>-laboratory frequencies, investigations |

1  
2  
3  
4  
5  
6  
7  
8  
9  
10  
11  
12  
13  
14

|                                                                                                                                      |
|--------------------------------------------------------------------------------------------------------------------------------------|
| -medical devices, required assistance (oxygen, CPAP)<br>-special adaptations required in adult care centre<br>-funding/medical costs |
|--------------------------------------------------------------------------------------------------------------------------------------|

15  
16  
17  
18

|                          |
|--------------------------|
| <b>Functional status</b> |
|--------------------------|

19  
20  
21  
22  
23  
24  
25  
26  
27  
28  
29  
30  
31  
32  
33  
34  
35  
36  
37  
38  
39  
40  
41  
42  
43  
44  
45  
46  
47  
48  
49  
50  
51  
52  
53  
54  
55  
56  
57  
58  
59  
60

|                                                            |
|------------------------------------------------------------|
| -communication<br>-activities of daily living<br>-mobility |
|------------------------------------------------------------|

Modified SSHADES Psychosocial Assessment:

**Strengths**

*\*tell me about the things you are good at*  
*\*what would others say you are good at*  
*\*what do you think are your best qualities?*

**School and Employment**

*\*is client currently in school*  
*\*how much school has client missed due to illness*  
*\*how does illness affect schooling*  
*\*what are client's thoughts about school? (shy, lots of friends, bullied, conflict?)*  
*\*school achievement*  
*\*participation in school activities and/or sport*  
*\*goals after school*  
*\*does participant have a SIN number*  
*\*past employment*  
*\*employment goals*

**Home and Environment**

**Housing and Immediate family**

*-\*housing security/safety*  
*\*who resides in the home*  
*\*who frequents the home*  
*\*future housing plans*  
*\*court orders/custody documents- impact on medical planning*

**Supports**

*\*relationship function*  
*\*family supports*  
*\*peer supports*  
*\*spirituality/religion*  
*\*professional supports*  
*\*who do you turn to when condition worsens*

**Finances**

*\*income sources*  
*\*monthly income*  
*\*health insurance and extended health coverage*  
*\*food security*  
*\*does participant have a bank account (sole or joint? Must be sole to receive AB Works unless trusteeship)*  
*\*does participant have photo ID*

1  
2  
3  
4  
5  
6  
7  
8  
9  
10  
11  
12  
13  
14  
15  
16  
17  
18  
19  
20  
21  
22  
23  
24  
25  
26  
27  
28  
29  
30  
31  
32  
33  
34  
35  
36  
37  
38  
39  
40  
41  
42  
43  
44  
45  
46  
47  
48  
49  
50  
51  
52  
53  
54  
55  
56  
57  
58  
59  
60

|                                                                                                                                                                                                                                                                                                                                                                                                                                                                                                                 |
|-----------------------------------------------------------------------------------------------------------------------------------------------------------------------------------------------------------------------------------------------------------------------------------------------------------------------------------------------------------------------------------------------------------------------------------------------------------------------------------------------------------------|
| <p><b>Transportation</b><br/> <i>*how do you get around?</i><br/> <i>*is transportation a barrier to obtaining medical care OR adhering to medical plan?</i></p>                                                                                                                                                                                                                                                                                                                                                |
| <p><b>Activities</b><br/> <i>*organized activities</i><br/> <i>*informal leisure</i><br/> <i>*solo versus social activities</i><br/> <i>*financial barriers to participating in activities</i></p>                                                                                                                                                                                                                                                                                                              |
| <p><b>Drugs/Substance Use</b><br/> <i>*use harm-reduction approach</i><br/> <i>*is there anyone in your life who has issue with substance abuse?</i><br/> <i>*participant's history of substance use/abuse, including legal, illicit and prescription</i><br/> <i>*does participant have insight into how substances impact general health and his/her particular medical condition(s)</i><br/> <i>*do you know where to get information on substance abuse?</i><br/> <i>*complete AADIS if appropriate</i></p> |
| <p><b>Emotions/Depression</b><br/> <i>*how is your mood</i><br/> <i>*self-harm, suicidal ideation</i><br/> <i>*coping and adjustment to illness</i><br/> <i>*relationship between mental health and condition</i></p>                                                                                                                                                                                                                                                                                           |
| <p><b>Sexuality</b><br/> <i>*relationship status and history</i><br/> <i>*gender identity and sexual orientation</i><br/> <i>*reproductive sexual health</i><br/> <i>*do you know where to get information on safe sex and sexual health</i></p>                                                                                                                                                                                                                                                                |
| <p><b>Safety</b><br/> <i>*how safe do you feel at school/home/work</i><br/> <i>*domestic violence history</i><br/> <i>*neighbourhood and community safety</i><br/> <i>*history of involvement with legal system</i><br/> <i>*do safety concerns affect medical care or adherence to medical plan?</i></p>                                                                                                                                                                                                       |

Transition Plan:

|                                                                                                                          |
|--------------------------------------------------------------------------------------------------------------------------|
| <p><b>TRAQ Summary</b><br/>         -notify study staff if not completed</p>                                             |
| <p><b>Preparation</b><br/>         -summary<br/>         -goals (patient-specific)<br/>         -actions (navigator)</p> |
| <p><b>Self-management</b><br/>         -summary<br/>         -goals<br/>         -actions</p>                            |
| <p><b>Systems brokering</b><br/>         -summary<br/>         -goals<br/>         -actions</p>                          |
| <p><b>Social determinants of health</b></p>                                                                              |

1  
2  
3  
4  
5  
6  
7  
8  
9  
10  
11  
12  
13  
14  
15  
16  
17  
18  
19  
20  
21  
22  
23  
24  
25  
26  
27  
28  
29  
30  
31  
32  
33  
34  
35  
36  
37  
38  
39  
40  
41  
42  
43  
44  
45  
46  
47  
48  
49  
50  
51  
52  
53  
54  
55  
56  
57  
58  
59  
60

|          |
|----------|
| -summary |
| -goals   |
| -actions |

|                                                                                      |
|--------------------------------------------------------------------------------------|
| <b>Navigator prospective estimate of case complexity at assessment:</b> low/med/high |
|--------------------------------------------------------------------------------------|

For peer review only



# Reporting checklist for protocol of a clinical trial.

Based on the SPIRIT guidelines.

## Instructions to authors

Complete this checklist by entering the page numbers from your manuscript where readers will find each of the items listed below.

Your article may not currently address all the items on the checklist. Please modify your text to include the missing information. If you are certain that an item does not apply, please write "n/a" and provide a short explanation.

Upload your completed checklist as an extra file when you submit to a journal.

In your methods section, say that you used the SPIRIT reporting guidelines, and cite them as:

Chan A-W, Tetzlaff JM, Altman DG, Laupacis A, Gøtzsche PC, Krleža-Jerić K, Hróbjartsson A, Mann H, Dickersin K, Berlin J, Doré C, Parulekar W, Summerskill W, Groves T, Schulz K, Sox H, Rockhold FW, Rennie D, Moher D. SPIRIT 2013 Statement: Defining standard protocol items for clinical trials. *Ann Intern Med.* 2013;158(3):200-207

|                                             |                     | Reporting Item                                                                                               | Page Number |
|---------------------------------------------|---------------------|--------------------------------------------------------------------------------------------------------------|-------------|
| <b>Administrative information</b>           |                     |                                                                                                              |             |
| Title                                       | <a href="#">#1</a>  | Descriptive title identifying the study design, population, interventions, and, if applicable, trial acronym | 1           |
| Trial registration                          | <a href="#">#2a</a> | Trial identifier and registry name. If not yet registered, name of intended registry                         | 1           |
| Trial registration: data set                | <a href="#">#2b</a> | All items from the World Health Organization Trial Registration Data Set                                     |             |
| Protocol version                            | <a href="#">#3</a>  | Date and version identifier                                                                                  | 1           |
| Funding                                     | <a href="#">#4</a>  | Sources and types of financial, material, and other support                                                  | 1           |
| Roles and responsibilities: contributorship | <a href="#">#5a</a> | Names, affiliations, and roles of protocol contributors                                                      | 1-3         |

|    |                               |                     |                                                                                            |     |
|----|-------------------------------|---------------------|--------------------------------------------------------------------------------------------|-----|
| 1  | Roles and                     | <a href="#">#5b</a> | Name and contact information for the trial sponsor                                         |     |
| 2  | responsibilities: sponsor     |                     |                                                                                            |     |
| 3  | contact information           |                     |                                                                                            |     |
| 4  |                               |                     |                                                                                            |     |
| 5  |                               |                     |                                                                                            |     |
| 6  | Roles and                     | <a href="#">#5c</a> | Role of study sponsor and funders, if any, in study design; collection, management,        | 1   |
| 7  | responsibilities: sponsor     |                     | analysis, and interpretation of data; writing of the report; and the decision to submit    |     |
| 8  | and funder                    |                     | the report for publication, including whether they will have ultimate authority over       |     |
| 9  |                               |                     | any of these activities                                                                    |     |
| 10 |                               |                     |                                                                                            |     |
| 11 |                               |                     |                                                                                            |     |
| 12 |                               |                     |                                                                                            |     |
| 13 | Roles and                     | <a href="#">#5d</a> | Composition, roles, and responsibilities of the coordinating centre, steering              | 3-4 |
| 14 | responsibilities:             |                     | committee, endpoint adjudication committee, data management team, and other                |     |
| 15 | committees                    |                     | individuals or groups overseeing the trial, if applicable (see Item 21a for data           |     |
| 16 |                               |                     | monitoring committee)                                                                      |     |
| 17 |                               |                     |                                                                                            |     |
| 18 |                               |                     |                                                                                            |     |
| 19 |                               |                     |                                                                                            |     |
| 20 | <b>Introduction</b>           |                     |                                                                                            |     |
| 21 |                               |                     |                                                                                            |     |
| 22 | Background and                | <a href="#">#6a</a> | Description of research question and justification for undertaking the trial, including    | 7   |
| 23 | rationale                     |                     | summary of relevant studies (published and unpublished) examining benefits and             |     |
| 24 |                               |                     | harms for each intervention                                                                |     |
| 25 |                               |                     |                                                                                            |     |
| 26 |                               |                     |                                                                                            |     |
| 27 |                               |                     |                                                                                            |     |
| 28 | Background and                | <a href="#">#6b</a> | Explanation for choice of comparators                                                      | 7   |
| 29 | rationale: choice of          |                     |                                                                                            |     |
| 30 | comparators                   |                     |                                                                                            |     |
| 31 |                               |                     |                                                                                            |     |
| 32 |                               |                     |                                                                                            |     |
| 33 | Objectives                    | <a href="#">#7</a>  | Specific objectives or hypotheses                                                          | 7   |
| 34 |                               |                     |                                                                                            |     |
| 35 |                               |                     |                                                                                            |     |
| 36 | Trial design                  | <a href="#">#8</a>  | Description of trial design including type of trial (eg, parallel group, crossover,        | 7   |
| 37 |                               |                     | factorial, single group), allocation ratio, and framework (eg, superiority, equivalence,   |     |
| 38 |                               |                     | non-inferiority, exploratory)                                                              |     |
| 39 |                               |                     |                                                                                            |     |
| 40 |                               |                     |                                                                                            |     |
| 41 | <b>Methods: Participants,</b> |                     |                                                                                            |     |
| 42 | <b>interventions, and</b>     |                     |                                                                                            |     |
| 43 | <b>outcomes</b>               |                     |                                                                                            |     |
| 44 |                               |                     |                                                                                            |     |
| 45 |                               |                     |                                                                                            |     |
| 46 | Study setting                 | <a href="#">#9</a>  | Description of study settings (eg, community clinic, academic hospital) and list of        | 8   |
| 47 |                               |                     | countries where data will be collected. Reference to where list of study sites can be      |     |
| 48 |                               |                     | obtained                                                                                   |     |
| 49 |                               |                     |                                                                                            |     |
| 50 |                               |                     |                                                                                            |     |
| 51 |                               |                     |                                                                                            |     |
| 52 | Eligibility criteria          | <a href="#">#10</a> | Inclusion and exclusion criteria for participants. If applicable, eligibility criteria for | 8   |
| 53 |                               |                     | study centres and individuals who will perform the interventions (eg, surgeons,            |     |
| 54 |                               |                     | psychotherapists)                                                                          |     |
| 55 |                               |                     |                                                                                            |     |
| 56 |                               |                     |                                                                                            |     |
| 57 |                               |                     |                                                                                            |     |
| 58 |                               |                     |                                                                                            |     |
| 59 |                               |                     |                                                                                            |     |
| 60 |                               |                     |                                                                                            |     |

|    |                              |                      |                                                                                       |       |
|----|------------------------------|----------------------|---------------------------------------------------------------------------------------|-------|
| 1  | Interventions:               | <a href="#">#11a</a> | Interventions for each group with sufficient detail to allow replication, including   | 11    |
| 2  | description                  |                      | how and when they will be administered                                                |       |
| 3  |                              |                      |                                                                                       |       |
| 4  |                              |                      |                                                                                       |       |
| 5  | Interventions:               | <a href="#">#11b</a> | Criteria for discontinuing or modifying allocated interventions for a given trial     | 12    |
| 6  | modifications                |                      | participant (eg, drug dose change in response to harms, participant request, or       |       |
| 7  |                              |                      | improving / worsening disease)                                                        |       |
| 8  |                              |                      |                                                                                       |       |
| 9  |                              |                      |                                                                                       |       |
| 10 | Interventions: adherence     | <a href="#">#11c</a> | Strategies to improve adherence to intervention protocols, and any procedures for     | 12    |
| 11 |                              |                      | monitoring adherence (eg, drug tablet return; laboratory tests)                       |       |
| 12 |                              |                      |                                                                                       |       |
| 13 |                              |                      |                                                                                       |       |
| 14 | Interventions:               | <a href="#">#11d</a> | Relevant concomitant care and interventions that are permitted or prohibited during   | n/a   |
| 15 | concomitant care             |                      | the trial                                                                             |       |
| 16 |                              |                      |                                                                                       |       |
| 17 |                              |                      |                                                                                       |       |
| 18 | Outcomes                     | <a href="#">#12</a>  | Primary, secondary, and other outcomes, including the specific measurement            | 13    |
| 19 |                              |                      | variable (eg, systolic blood pressure), analysis metric (eg, change from baseline,    |       |
| 20 |                              |                      | final value, time to event), method of aggregation (eg, median, proportion), and time |       |
| 21 |                              |                      | point for each outcome. Explanation of the clinical relevance of chosen efficacy and  |       |
| 22 |                              |                      | harm outcomes is strongly recommended                                                 |       |
| 23 |                              |                      |                                                                                       |       |
| 24 |                              |                      |                                                                                       |       |
| 25 |                              |                      |                                                                                       |       |
| 26 | Participant timeline         | <a href="#">#13</a>  | Time schedule of enrolment, interventions (including any run-ins and washouts),       | 9, 13 |
| 27 |                              |                      | assessments, and visits for participants. A schematic diagram is highly recommended   |       |
| 28 |                              |                      | (see Figure)                                                                          |       |
| 29 |                              |                      |                                                                                       |       |
| 30 |                              |                      |                                                                                       |       |
| 31 |                              |                      |                                                                                       |       |
| 32 | Sample size                  | <a href="#">#14</a>  | Estimated number of participants needed to achieve study objectives and how it was    | 10    |
| 33 |                              |                      | determined, including clinical and statistical assumptions supporting any sample size |       |
| 34 |                              |                      | calculations                                                                          |       |
| 35 |                              |                      |                                                                                       |       |
| 36 |                              |                      |                                                                                       |       |
| 37 | Recruitment                  | <a href="#">#15</a>  | Strategies for achieving adequate participant enrolment to reach target sample size   | 8     |
| 38 |                              |                      |                                                                                       |       |
| 39 |                              |                      |                                                                                       |       |
| 40 | <b>Methods: Assignment</b>   |                      |                                                                                       |       |
| 41 | <b>of interventions (for</b> |                      |                                                                                       |       |
| 42 | <b>controlled trials)</b>    |                      |                                                                                       |       |
| 43 |                              |                      |                                                                                       |       |
| 44 |                              |                      |                                                                                       |       |
| 45 | Allocation: sequence         | <a href="#">#16a</a> | Method of generating the allocation sequence (eg, computer-generated random           | 11    |
| 46 | generation                   |                      | numbers), and list of any factors for stratification. To reduce predictability of a   |       |
| 47 |                              |                      | random sequence, details of any planned restriction (eg, blocking) should be          |       |
| 48 |                              |                      | provided in a separate document that is unavailable to those who enrol participants   |       |
| 49 |                              |                      | or assign interventions                                                               |       |
| 50 |                              |                      |                                                                                       |       |
| 51 |                              |                      |                                                                                       |       |
| 52 |                              |                      |                                                                                       |       |
| 53 |                              |                      |                                                                                       |       |
| 54 | Allocation concealment       | <a href="#">#16b</a> | Mechanism of implementing the allocation sequence (eg, central telephone;             | 11    |
| 55 | mechanism                    |                      | sequentially numbered, opaque, sealed envelopes), describing any steps to conceal     |       |
| 56 |                              |                      | the sequence until interventions are assigned                                         |       |
| 57 |                              |                      |                                                                                       |       |
| 58 |                              |                      |                                                                                       |       |
| 59 |                              |                      |                                                                                       |       |
| 60 |                              |                      |                                                                                       |       |

|    |                            |                      |                                                                                           |     |
|----|----------------------------|----------------------|-------------------------------------------------------------------------------------------|-----|
| 1  | Allocation:                | <a href="#">#16c</a> | Who will generate the allocation sequence, who will enrol participants, and who will      | 11  |
| 2  | implementation             |                      | assign participants to interventions                                                      |     |
| 3  |                            |                      |                                                                                           |     |
| 4  |                            |                      |                                                                                           |     |
| 5  | Blinding (masking)         | <a href="#">#17a</a> | Who will be blinded after assignment to interventions (eg, trial participants, care       | 11  |
| 6  |                            |                      | providers, outcome assessors, data analysts), and how                                     |     |
| 7  |                            |                      |                                                                                           |     |
| 8  |                            |                      |                                                                                           |     |
| 9  | Blinding (masking):        | <a href="#">#17b</a> | If blinded, circumstances under which unblinding is permissible, and procedure for        | n/a |
| 10 | emergency unblinding       |                      | revealing a participant's allocated intervention during the trial                         |     |
| 11 |                            |                      |                                                                                           |     |
| 12 |                            |                      |                                                                                           |     |
| 13 | <b>Methods: Data</b>       |                      |                                                                                           |     |
| 14 | <b>collection,</b>         |                      |                                                                                           |     |
| 15 | <b>management, and</b>     |                      |                                                                                           |     |
| 16 | <b>analysis</b>            |                      |                                                                                           |     |
| 17 |                            |                      |                                                                                           |     |
| 18 |                            |                      |                                                                                           |     |
| 19 | Data collection plan       | <a href="#">#18a</a> | Plans for assessment and collection of outcome, baseline, and other trial data,           | 13  |
| 20 |                            |                      | including any related processes to promote data quality (eg, duplicate measurements,      |     |
| 21 |                            |                      | training of assessors) and a description of study instruments (eg, questionnaires,        |     |
| 22 |                            |                      | laboratory tests) along with their reliability and validity, if known. Reference to       |     |
| 23 |                            |                      | where data collection forms can be found, if not in the protocol                          |     |
| 24 |                            |                      |                                                                                           |     |
| 25 |                            |                      |                                                                                           |     |
| 26 |                            |                      |                                                                                           |     |
| 27 |                            |                      |                                                                                           |     |
| 28 | Data collection plan:      | <a href="#">#18b</a> | Plans to promote participant retention and complete follow-up, including list of any      | 13  |
| 29 | retention                  |                      | outcome data to be collected for participants who discontinue or deviate from             |     |
| 30 |                            |                      | intervention protocols                                                                    |     |
| 31 |                            |                      |                                                                                           |     |
| 32 |                            |                      |                                                                                           |     |
| 33 | Data management            | <a href="#">#19</a>  | Plans for data entry, coding, security, and storage, including any related processes to   |     |
| 34 |                            |                      | promote data quality (eg, double data entry; range checks for data values). Reference     |     |
| 35 |                            |                      | to where details of data management procedures can be found, if not in the protocol       |     |
| 36 |                            |                      |                                                                                           |     |
| 37 |                            |                      |                                                                                           |     |
| 38 |                            |                      |                                                                                           |     |
| 39 | Statistics: outcomes       | <a href="#">#20a</a> | Statistical methods for analysing primary and secondary outcomes. Reference to            | 14  |
| 40 |                            |                      | where other details of the statistical analysis plan can be found, if not in the protocol |     |
| 41 |                            |                      |                                                                                           |     |
| 42 |                            |                      |                                                                                           |     |
| 43 | Statistics: additional     | <a href="#">#20b</a> | Methods for any additional analyses (eg, subgroup and adjusted analyses)                  | 14  |
| 44 | analyses                   |                      |                                                                                           |     |
| 45 |                            |                      |                                                                                           |     |
| 46 |                            |                      |                                                                                           |     |
| 47 | Statistics: analysis       | <a href="#">#20c</a> | Definition of analysis population relating to protocol non-adherence (eg, as              |     |
| 48 | population and missing     |                      | randomised analysis), and any statistical methods to handle missing data (eg,             |     |
| 49 | data                       |                      | multiple imputation)                                                                      |     |
| 50 |                            |                      |                                                                                           |     |
| 51 |                            |                      |                                                                                           |     |
| 52 | <b>Methods: Monitoring</b> |                      |                                                                                           |     |
| 53 |                            |                      |                                                                                           |     |
| 54 | Data monitoring: formal    | <a href="#">#21a</a> | Composition of data monitoring committee (DMC); summary of its role and                   | 14  |
| 55 | committee                  |                      | reporting structure; statement of whether it is independent from the sponsor and          |     |
| 56 |                            |                      | competing interests; and reference to where further details about its charter can be      |     |
| 57 |                            |                      |                                                                                           |     |
| 58 |                            |                      |                                                                                           |     |
| 59 |                            |                      |                                                                                           |     |
| 60 |                            |                      |                                                                                           |     |

found, if not in the protocol. Alternatively, an explanation of why a DMC is not needed

|    |                          |                      |                                                                                         |
|----|--------------------------|----------------------|-----------------------------------------------------------------------------------------|
| 1  |                          |                      |                                                                                         |
| 2  |                          |                      |                                                                                         |
| 3  |                          |                      |                                                                                         |
| 4  | Data monitoring:         | <a href="#">#21b</a> | Description of any interim analyses and stopping guidelines, including who will         |
| 5  | interim analysis         |                      | have access to these interim results and make the final decision to terminate the trial |
| 6  |                          |                      |                                                                                         |
| 7  |                          |                      | n/a, no                                                                                 |
| 8  |                          |                      | interim                                                                                 |
| 9  |                          |                      | analyses                                                                                |
| 10 |                          |                      | planned                                                                                 |
| 11 | Harms                    | <a href="#">#22</a>  | Plans for collecting, assessing, reporting, and managing solicited and spontaneously    |
| 12 |                          |                      | reported adverse events and other unintended effects of trial interventions or trial    |
| 13 |                          |                      | conduct                                                                                 |
| 14 |                          |                      |                                                                                         |
| 15 |                          |                      |                                                                                         |
| 16 | Auditing                 | <a href="#">#23</a>  | Frequency and procedures for auditing trial conduct, if any, and whether the process    |
| 17 |                          |                      | will be independent from investigators and the sponsor                                  |
| 18 |                          |                      |                                                                                         |
| 19 |                          |                      |                                                                                         |
| 20 | <b>Ethics and</b>        |                      |                                                                                         |
| 21 | <b>dissemination</b>     |                      |                                                                                         |
| 22 |                          |                      |                                                                                         |
| 23 |                          |                      |                                                                                         |
| 24 | Research ethics          | <a href="#">#24</a>  | Plans for seeking research ethics committee / institutional review board (REC / IRB)    |
| 25 | approval                 |                      | approval                                                                                |
| 26 |                          |                      |                                                                                         |
| 27 |                          |                      |                                                                                         |
| 28 | Protocol amendments      | <a href="#">#25</a>  | Plans for communicating important protocol modifications (eg, changes to eligibility    |
| 29 |                          |                      | criteria, outcomes, analyses) to relevant parties (eg, investigators, REC / IRBs, trial |
| 30 |                          |                      | participants, trial registries, journals, regulators)                                   |
| 31 |                          |                      |                                                                                         |
| 32 |                          |                      |                                                                                         |
| 33 | Consent or assent        | <a href="#">#26a</a> | Who will obtain informed consent or assent from potential trial participants or         |
| 34 |                          |                      | authorised surrogates, and how (see Item 32)                                            |
| 35 |                          |                      |                                                                                         |
| 36 |                          |                      |                                                                                         |
| 37 | Consent or assent:       | <a href="#">#26b</a> | Additional consent provisions for collection and use of participant data and            |
| 38 | ancillary studies        |                      | biological specimens in ancillary studies, if applicable                                |
| 39 |                          |                      |                                                                                         |
| 40 |                          |                      |                                                                                         |
| 41 | Confidentiality          | <a href="#">#27</a>  | How personal information about potential and enrolled participants will be collected,   |
| 42 |                          |                      | shared, and maintained in order to protect confidentiality before, during, and after    |
| 43 |                          |                      | the trial                                                                               |
| 44 |                          |                      |                                                                                         |
| 45 |                          |                      |                                                                                         |
| 46 | Declaration of interests | <a href="#">#28</a>  | Financial and other competing interests for principal investigators for the overall     |
| 47 |                          |                      | trial and each study site                                                               |
| 48 |                          |                      |                                                                                         |
| 49 |                          |                      |                                                                                         |
| 50 | Data access              | <a href="#">#29</a>  | Statement of who will have access to the final trial dataset, and disclosure of         |
| 51 |                          |                      | contractual agreements that limit such access for investigators                         |
| 52 |                          |                      |                                                                                         |
| 53 |                          |                      |                                                                                         |
| 54 | Ancillary and post trial | <a href="#">#30</a>  | Provisions, if any, for ancillary and post-trial care, and for compensation to those    |
| 55 | care                     |                      | who suffer harm from trial participation                                                |
| 56 |                          |                      |                                                                                         |
| 57 |                          |                      |                                                                                         |
| 58 |                          |                      |                                                                                         |
| 59 |                          |                      |                                                                                         |
| 60 |                          |                      |                                                                                         |

|    |                       |                      |                                                                                            |              |
|----|-----------------------|----------------------|--------------------------------------------------------------------------------------------|--------------|
| 1  | Dissemination policy: | <a href="#">#31a</a> | Plans for investigators and sponsor to communicate trial results to participants,          | 15           |
| 2  | trial results         |                      | healthcare professionals, the public, and other relevant groups (eg, via publication,      |              |
| 3  |                       |                      | reporting in results databases, or other data sharing arrangements), including any         |              |
| 4  |                       |                      | publication restrictions                                                                   |              |
| 5  |                       |                      |                                                                                            |              |
| 6  |                       |                      |                                                                                            |              |
| 7  |                       |                      |                                                                                            |              |
| 8  | Dissemination policy: | <a href="#">#31b</a> | Authorship eligibility guidelines and any intended use of professional writers             |              |
| 9  | authorship            |                      |                                                                                            |              |
| 10 |                       |                      |                                                                                            |              |
| 11 |                       |                      |                                                                                            |              |
| 12 | Dissemination policy: | <a href="#">#31c</a> | Plans, if any, for granting public access to the full protocol, participant-level dataset, |              |
| 13 | reproducible research |                      | and statistical code                                                                       |              |
| 14 |                       |                      |                                                                                            |              |
| 15 |                       |                      |                                                                                            |              |
| 16 | <b>Appendices</b>     |                      |                                                                                            |              |
| 17 |                       |                      |                                                                                            |              |
| 18 | Informed consent      | <a href="#">#32</a>  | Model consent form and other related documentation given to participants and               | Not included |
| 19 | materials             |                      | authorised surrogates                                                                      | in appendix  |
| 20 |                       |                      |                                                                                            |              |
| 21 |                       |                      |                                                                                            |              |
| 22 | Biological specimens  | <a href="#">#33</a>  | Plans for collection, laboratory evaluation, and storage of biological specimens for       | n/a          |
| 23 |                       |                      | genetic or molecular analysis in the current trial and for future use in ancillary         |              |
| 24 |                       |                      | studies, if applicable                                                                     |              |
| 25 |                       |                      |                                                                                            |              |
| 26 |                       |                      |                                                                                            |              |

None The SPIRIT checklist is distributed under the terms of the Creative Commons Attribution License CC-BY-ND 3.0. This checklist can be completed online using <https://www.goodreports.org/>, a tool made by the [EQUATOR Network](#) in collaboration with [Penelope.ai](#)

# BMJ Open

## A pragmatic trial evaluating the effectiveness of a patient navigator to decrease emergency room utilization in transition age youth with chronic conditions: The Transition Navigator Trial Protocol

|                                 |                                                                                                                                                                                                                                                                                                                                                                                                                                                                                                                                                                                                                                                                                                                                                                                                                                   |
|---------------------------------|-----------------------------------------------------------------------------------------------------------------------------------------------------------------------------------------------------------------------------------------------------------------------------------------------------------------------------------------------------------------------------------------------------------------------------------------------------------------------------------------------------------------------------------------------------------------------------------------------------------------------------------------------------------------------------------------------------------------------------------------------------------------------------------------------------------------------------------|
| Journal:                        | <i>BMJ Open</i>                                                                                                                                                                                                                                                                                                                                                                                                                                                                                                                                                                                                                                                                                                                                                                                                                   |
| Manuscript ID                   | bmjopen-2019-034309.R1                                                                                                                                                                                                                                                                                                                                                                                                                                                                                                                                                                                                                                                                                                                                                                                                            |
| Article Type:                   | Protocol                                                                                                                                                                                                                                                                                                                                                                                                                                                                                                                                                                                                                                                                                                                                                                                                                          |
| Date Submitted by the Author:   | 25-Oct-2019                                                                                                                                                                                                                                                                                                                                                                                                                                                                                                                                                                                                                                                                                                                                                                                                                       |
| Complete List of Authors:       | Samuel, Susan; University of Calgary, Department of Pediatrics<br>Dimitropoulos, Gina; University of Calgary, Faculty of Social Work<br>Schraeder, Kyleigh ; University of Calgary, Pediatrics<br>Klarenbach, Scott; University of Alberta<br>Nettel-Aguirre, Alberto; University of Calgary Cumming School of Medicine<br>Guilcher, Greg; University of Calgary<br>Pacaud, D; University of Calgary, Department of Paediatrics<br>Pinzon, Jorge; University of Calgary<br>Lang, Eddy; University of Calgary, Emergency Medicine<br>Andrew, Gail; University of Alberta<br>Zwaigenbaum, Lonnie; University of Alberta,<br>Scott, Shannon; University of Alberta, Nursing<br>McBrien, Kerry; University of Calgary, Community Health Sciences<br>Hamiwka, Lorraine; University of Calgary<br>Mackie, Andrew; University of Alberta |
| <b>Primary Subject Heading</b>: | Paediatrics                                                                                                                                                                                                                                                                                                                                                                                                                                                                                                                                                                                                                                                                                                                                                                                                                       |
| Secondary Subject Heading:      | Patient-centred medicine                                                                                                                                                                                                                                                                                                                                                                                                                                                                                                                                                                                                                                                                                                                                                                                                          |
| Keywords:                       | PAEDIATRICALS, Paediatric A&E and ambulatory care < PAEDIATRICALS, Paediatric nephrology < NEPHROLOGY                                                                                                                                                                                                                                                                                                                                                                                                                                                                                                                                                                                                                                                                                                                             |
|                                 |                                                                                                                                                                                                                                                                                                                                                                                                                                                                                                                                                                                                                                                                                                                                                                                                                                   |

SCHOLARONE™  
Manuscripts

1  
2  
3 **Title:** A pragmatic trial evaluating the effectiveness of a patient navigator to decrease emergency  
4 room utilization in transition age youth with chronic conditions: The Transition Navigator Trial  
5 Protocol  
6  
7  
8

9 **Short title:** Transition Navigator Trial  
10  
11  
12

13 **Clinicaltrials.gov Identifier:** NCT03342495  
14  
15

16  
17 **Protocol Version 1.0**  
18  
19

20  
21 **November 1, 2017**  
22  
23  
24

25 **Trial Sponsor:** Alberta Health Services (Research Number 1040209), Alberta Children's  
26 Hospital Foundation (Research Number 1042146), Stollery Children's Hospital Foundation,  
27 Canadian Institutes of Health Research (388256-CHI-CBBA-161557)  
28  
29  
30

31  
32 **Role of study sponsor:** The funders had no role in the design of this study.  
33  
34  
35

36 **Coordinating Centre:** University of Calgary  
37  
38

#### 39 **Corresponding Author**

40  
41 Dr. Susan M. Samuel  
42 28 Oki Drive NW  
43 Calgary, AB  
44 T3B 6A8  
45 Tel: 403 955 7950  
46 Fax: 403 955 2203  
47 Email: [susan.samuel@ahs.ca](mailto:susan.samuel@ahs.ca)  
48  
49  
50

#### 51 **Authors**

52  
53  
54  
55 Susan M. Samuel <sup>1</sup>  
56  
57  
58  
59  
60



1  
2  
3 Gina Dimitropoulos <sup>2</sup>

4  
5 Kyleigh Schraeder <sup>3</sup>

6  
7 Scott Klarenbach <sup>7</sup>

8  
9 Alberto Nettel-Aguirre <sup>10</sup>

10  
11 Greg Guilcher <sup>5</sup>

12  
13 Daniele Pacaud <sup>11</sup>

14  
15 Jorge Pinzon <sup>3</sup>

16  
17 Eddy Lang <sup>8</sup>

18  
19 Gail Andrew <sup>4</sup>

20  
21 Lonnie Zwaigenbaum <sup>13</sup>

22  
23 Shannon Scott <sup>12</sup>

24  
25 Kerry McBrien <sup>9</sup>

26  
27 Lorraine Hamiwka <sup>6</sup>

28  
29 Andrew S. Mackie <sup>14</sup>

30  
31  
32 <sup>1</sup> Alberta Children's Hospital Research Institute, O'Brien Institute for Public Health, Department  
33 of Pediatrics, Section Of Nephrology, Department of Community Health Sciences, University of  
34 Calgary, Calgary, Alberta, Canada

35  
36  
37 <sup>2</sup> Faculty of Social Work, Department of Psychiatry, Alberta Children's Hospital Research  
38 Institute, University of Calgary, Calgary, Alberta, Canada

39  
40  
41 <sup>3</sup> Alberta Children's Hospital Research Institute, Department of Pediatrics, University of  
42 Calgary, Calgary, Alberta, Canada

43  
44  
45 <sup>4</sup> Department of Pediatrics, University of Alberta, Edmonton, Alberta, Canada

46  
47  
48 <sup>5</sup> Section of Pediatric Oncology and Blood and Marrow Transplant, Alberta Children's Hospital,  
49 University of Calgary, Calgary, Alberta, Canada

50  
51  
52 <sup>6</sup> Section of Nephrology, Alberta Children's Hospital, University of Calgary, Calgary, Alberta,  
53 Canada

54  
55  
56 <sup>7</sup> Department of Medicine, Division of Nephrology, University of Alberta, Edmonton, Alberta,  
57 Canada

58  
59  
60 <sup>8</sup> Department of Emergency Medicine, University of Calgary, Calgary, Alberta, Canada

1  
2  
3  
4  
5  
6  
7  
8  
9  
10  
11  
12  
13  
14  
15  
16  
17  
18  
19  
20  
21  
22  
23  
24  
25  
26  
27  
28  
29  
30  
31  
32  
33  
34  
35  
36  
37  
38  
39  
40  
41  
42  
43  
44  
45  
46  
47  
48  
49  
50  
51  
52  
53  
54  
55  
56  
57  
58  
59  
60

<sup>9</sup>Department of Family Medicine, Department of Community Health Sciences, University of Calgary, Calgary, Alberta, Canada

<sup>10</sup> Alberta Children's Hospital Research Institute, O'Brien Institute for Public Health, Department of Pediatrics, Department of Community Health Sciences, University of Calgary, Calgary, Alberta, Canada

<sup>11</sup> Division of Diabetes and Endocrinology, Alberta Children's Hospital, Calgary, Alberta, Canada

<sup>12</sup> Faculty of Nursing, University of Alberta, Edmonton, Alberta, Canada

<sup>13</sup> Department of Pediatrics, Autism Research Centre, University of Alberta, Edmonton, Alberta, Canada

<sup>14</sup> Division of Cardiology, Department of Pediatrics, University of Alberta, Edmonton, Alberta, Canada

#### **Author contribution:**

AM, SS, and GD conceived the idea for the study. SS, AM, and GD wrote the first draft of the protocol. SS and KS wrote the first draft of the protocol manuscript and incorporated critical feedback from others. SK, ANA, GG, DP, JP, EL, GA, LZ, SS, KM and LH provided critical input into the development of the trial protocol and gave critical feedback on this manuscript. SS, AM and GD led the funding applications and all other authors contributed review of applications.

#### **Competing interest statement:**

There are no competing interests for authors relevant to this manuscript.

**Operational Oversight Committee:** Catherine Morrison (Alberta Health Services), Jorge Pinzon (Department of Pediatrics, University of Calgary), Gail Andrew (Department of Pediatrics, University of Alberta), Catherine Hill (Alberta Health Services), Karen Johnston (Alberta Health Services), Susan Hughes (Alberta Health Services), Katie Byford Richardson (Alberta Health Services), Jane Bankes (Alberta Health Services), Jake Jennings (Alberta Health Services), Kyleigh Schraeder (University of Calgary), Brooke Allemang (University of Calgary), Elizabeth Morgan-Maver (University of Calgary), Gurkeet Lalli (University of Calgary), Daniella San Martin-Feeney (University of Alberta), Laurel Ryan (University of Calgary)

**Trial Management Committee:** Alberto Nettel-Aguirre (University of Calgary), Daniele Pacaud (Department of Pediatrics, University of Calgary), Greg Guilcher (Section of Pediatric Oncology and Blood and Marrow Transplant, University of Calgary), Eddy Lang (Department of

1  
2  
3 Emergency Medicine, University of Calgary), Gail Andrew (Department of Pediatrics,  
4 University of Alberta), Iwona Wrobel (Department of Pediatrics, University of Calgary), Jorge  
5 Pinzon (Department of Pediatrics, University of Calgary), Kerry McBrien (Department of  
6 Family Medicine, Department of Community Health Sciences, University of Calgary), Lonnie  
7 Zwaigenbaum (Department of Pediatrics, Autism Research Centre, University of Alberta),  
8 Lorraine Hamiwka (Department of Pediatrics, University of Calgary), Scott Klarenbach  
9 (Department of Medicine, University of Alberta) April Elliott (Department of Pediatrics,  
10 University of Calgary), Catherine Morrison (Alberta Health Services), Catherine Hill (Alberta  
11 Health Services), Karen Johnston (Alberta Health Services), Kyleigh Schraeder (Department of  
12 Pediatrics, University of Calgary), Renee Farrell (Department of Pediatrics, University of  
13 Calgary), Elizabeth Morgan-Maver (University of Calgary), Gurkeet Lalli (University of  
14 Calgary), Daniella San Martin-Feeney (University of Alberta), Laurel Ryan (University of  
15 Calgary)  
16  
17  
18  
19  
20  
21

22 **Data Safety Monitoring Board:** Dr. Mario Cappelli (Children's Hospital of Eastern Ontario  
23 Research Institute, University of Ottawa), Dr. Anne Stephenson (Institute of Health Policy,  
24 Management and Evaluation, University of Toronto), Dr. Mina Matsuda-Abedini (Division of  
25 Nephrology, The Hospital for Sick Children, University of Toronto)  
26  
27  
28

29 **Scientific Advisory Board:** Dr. Graham Reid (Children's Health Research Institute, University  
30 of Western Ontario), Dr. Bethany Foster (Research Institute of the McGill University Health  
31 Centre, McGill University), Dr. Astrid Guttman (Senior Scientific Officer, Institute for Clinical  
32 Evaluative Sciences, University of Toronto)  
33  
34  
35  
36  
37  
38  
39  
40  
41  
42  
43

44 **Key Words:** adolescence, emerging adulthood, transition to adult care, pragmatic trial  
45  
46  
47  
48  
49

50  
51 **Word Count: 4000 (limit is 4000 words)**  
52  
53  
54  
55  
56  
57  
58  
59  
60

## ABSTRACT

### Introduction:

Transition to adult care is a challenging and complex process for youth with special health care needs. We aim to compare effectiveness of a patient navigator service in reducing emergency room (ER) use among adolescents with chronic health conditions transitioning to adult care.

### Methods and Analysis:

Pragmatic randomized controlled trial parallel group design comparing ER visit rates between patients with access to a personalized navigator intervention compared to usual care. Unit of randomization is the patient. Treatment assignment will not be blinded. Embedded qualitative study to understand navigator's role and cost analysis attributable to the intervention will be performed.

Patients aged 16-21 years, followed within a chronic disease clinic, expected to be transferred to adult care within 12 months and residing in Alberta during study period will be recruited from 3 tertiary care pediatric hospitals. Sample size will be 300 in each arm. Navigator intervention over 24 months is designed to assist participants in 4 domains: transition preparation, health system brokering, socioeconomic determinants of health, and self-management. Primary outcome is ER visit rate during observation period. Secondary outcomes are ambulatory and inpatient care utilization measures, as well as Transition Readiness Assessment Questionnaire score, and Short-Form Health Survey 12 (SF-12) score at 6 and 18 months post-randomization.

Poisson regression will compare rates of ER/urgent care visits between navigator and control participants, using intention to treat principle. Cost analysis of the intervention will be conducted. Thematic analysis will be used to identify perceptions of stakeholders regarding the role of navigators.

**Ethics and Dissemination:** Ethics approval was obtained from the University of Calgary Conjoint Health Research Ethics Board (REB #162561) and the University of Alberta Health Research Ethics Board (Pro00077325). Our team is comprised of diverse stakeholders who are committed to improving transition of care who will assist with dissemination of results.

Abstract word count: 300

**Trial Registration:** Clinicaltrials.gov NCT03342495

## Strengths and Limitations of this study

### [5 short bullet points]

- Population based sample from one Canadian province with universal health coverage
- Pragmatic randomized controlled trial design with broad inclusion criteria, and with an intervention embedded in a real world health care setting
- Participants are not blinded to the treatment arms, but blinded to primary outcome
- Contamination may occur from clinic based interventions which may duplicate some of the services the patient navigator may provide
- Participant recruitment to achieve the pre-specified sample size is anticipated to be challenge; particular attention to youth engagement strategies is required

For peer review only

## INTRODUCTION

Approximately 15-20% of adolescents in North America live with a chronic health condition, defined as a condition that lasts at least 3 months, is not yet curable, affects a child's normal activities, and requires ongoing care.<sup>1</sup> The majority (>90%) will require transfer from pediatric to adult services.<sup>1,2</sup> Sub-optimal transition to adult care leads to poor adherence with ambulatory care management, health deterioration and increased use of costly emergent health services.<sup>3,4</sup> Patient navigators are a promising, but unproven intervention to facilitate planned transitions from pediatric to adult care, and improve patient experience and outcomes.<sup>5</sup> Published studies describing patient navigator services are mostly single centre and single disease cohort studies, with non-randomized designs, thus, limiting generalizability to other health jurisdictions and disease populations.<sup>5</sup> Further, interventions requiring highly skilled health care workers tend to be expensive, and to justify such an intervention, a cost evaluation is necessary. To address these challenges we designed a pragmatic RCT, the Transition Navigator Trial (TNT), the protocol for which is described in this paper.

### Trial Objectives

The primary objective is to evaluate the impact of a personalized transition to adult care intervention (access to a patient navigator) compared to usual care for 16-21 year olds living with chronic health conditions who are transferring to adult care with respect to: a) ER/urgent care visits (*primary outcome*); and b) inpatient and ambulatory care utilization, transition readiness scores, and patient-reported health status (*secondary outcomes*). Secondary objectives are: a) to determine the net health care cost impact attributable to the patient navigator intervention; and b) to obtain perceptions of stakeholders regarding the role of patient navigators in reducing barriers to adult-oriented ambulatory care.

### Hypotheses

The patient navigator intervention will reduce all-cause ER/urgent care visit rates, improve transition readiness scores and patient-reported health status, and generate cost savings for the health system.

## METHODS AND ANALYSIS

This study will be conducted in accordance with the SPIRIT checklist<sup>6-8</sup> and CONSORT statement on pragmatic trial extension<sup>9</sup> (RCT), and COREQ.<sup>10,11</sup>

### Study Design and Setting

This study will use a parallel group, pragmatic RCT<sup>9</sup> design (Figures 1 and 2) with an embedded qualitative study. The RCT involves random allocation of young adults (ages 16 to 21 years) with a chronic medical/mental health condition to either a personalized transition intervention (access to a patient navigator) or usual transitional care at one of three tertiary care pediatric hospitals in Alberta, Canada.

1  
2  
3 Alberta, with a population of 4.1 million, has a universal publicly funded health care system that  
4 covers over 99% of the population.<sup>12</sup> Patients will be recruited from 3 tertiary care pediatric  
5 hospitals: the Stollery Children's Hospital, Alberta Children's Hospital, and Glenrose  
6 Rehabilitation Hospital.  
7

## 8 9 **Recruitment**

10  
11 Eligible participants will be identified from 41 pediatric specialty clinics at the 3 participating  
12 hospitals (Figure 3). These clinics were selected after extensive stakeholder input, as these patient  
13 groups have high potential for adverse outcomes if transitions are not managed optimally.<sup>4,12-15</sup>  
14 Participants will have chronic health conditions in these broad categories: endocrine,  
15 gastrointestinal, neurologic, neurodevelopmental, rheumatologic, renal, cardiac, hematologic,  
16 respiratory, and metabolic/genetic. The primary caregiver (legal guardian or parent) of the young  
17 adult will also be considered a study participant if he/she is willing; however, parent/guardian  
18 involvement is not a requirement. Primary caregiver will also provide information required for  
19 the study should the patient be non-verbal or lack capacity to participate in the study.  
20  
21

22  
23 Potentially eligible participants will be recruited through various methods including: 1) clinic staff  
24 identifying potential participants and requesting consent to contact by the study team, 2) patients  
25 can directly self-refer using a generic study email or phone number provided in recruitment  
26 posters, and 3) using mail-outs to potentially eligible participants who have used health services  
27 at the participating hospitals.  
28

29  
30 Trained research assistants are responsible for responding to any queries for enrollment via  
31 telephone or email. These research assistants are also responsible for screening potential  
32 participants for eligibility. The screening process is being conducted in person or by phone.  
33

## 34 35 **Inclusion criteria**

36  
37 To be eligible, participants must: (1) be between 16 and 21 years of age at the time of enrollment,  
38 (2) be receiving care from at least one of the selected pediatric outpatient hospital and community  
39 clinics (Figure 3), (3) have a chronic medical condition (defined as conditions which are >3 months  
40 in duration and/or lifelong with multiple morbidities and/or multi-organ/system manifestations or  
41 conditions which typically affect a single organ/system)<sup>16,17</sup> and (4) be expected to be transferred  
42 to adult specialty care in the next 12 months.  
43  
44

## 45 46 **Exclusion criteria**

47  
48 Exclusion criteria will be: (1) enrolled in another transition-related study involving a navigator or  
49 similar intervention; (2) transfer will not occur during the time interval for the study; (3) will be  
50 moving out of Alberta during the study (e.g., going away for college) resulting in inability to report  
51 on primary outcome (ER visits) within the province; (4) inability to read and write in English.  
52  
53

## 54 55 **Consent**

Informed written consent will be obtained from all participants prior to enrollment (see supplementary material 1). For patients who are minors (age 16-17), informed assent will be obtained where appropriate. When the patient is considered a mature minor (after a capacity assessment by the responsible physician) or at age 18, we will obtain consent. If a patient is consenting for him/herself, then consent forms will ask participants for permission to contact their parents/guardians as needed to facilitate care, and also for permission to disclose medical information to parents/guardians. Should the participant decline parent involvement in the study, parents will not be contacted nor will health information be provided to the parent.

The primary caregiver will consent for his/her own respective participation. Primary caregivers will also consent on behalf of young adult participants who lack capacity to do so themselves due to developmental delay. Consent for disclosure of personal health numbers (PHN) assigned by Alberta Health for universal health care access will be obtained, to allow examination of health service utilization at the patient level by linkage to administrative health datasets.

Participation will be voluntary and participants will be free to withdraw at any time. A small incentive will be offered to participants (\$25 at enrollment and \$25 at study end), as a token of appreciation of their participation.

### Study Timeline

Participants will be recruited over ~42 months. Recruitment started in January 2018, and will continue until target enrolment is reached. The duration of navigator support for participants in the intervention arm will be up to 24 months after randomization, and a minimum of 12 months for those enrolled later in the recruitment period. All participants will be observed for a minimum of 12, and maximum of 42 months. See timeline in Figure 4. A schematic diagram outlining the schedule of enrolment, assessments, and visits is shown in Table 1.

| Form                           | Screening | Enrollment | Randomi-<br>zation | Baseline | Repeat-<br>able | Months Post-Randomization |   |   |    |    |    |    |    |  |
|--------------------------------|-----------|------------|--------------------|----------|-----------------|---------------------------|---|---|----|----|----|----|----|--|
|                                |           |            |                    |          |                 | 3                         | 6 | 9 | 12 | 15 | 18 | 21 | 24 |  |
| CONSENT -<br>Participant       | X         |            |                    |          |                 |                           |   |   |    |    |    |    |    |  |
| CONSENT -<br>Caregiver         | X         |            |                    |          |                 |                           |   |   |    |    |    |    |    |  |
| ASSENT -<br>Participant        | X         |            |                    |          |                 |                           |   |   |    |    |    |    |    |  |
| Screening Form                 | X         |            |                    |          |                 |                           |   |   |    |    |    |    |    |  |
| Participant<br>Demographics    |           | X          |                    |          |                 |                           |   |   |    |    |    |    |    |  |
| Caregiver<br>Demographics      |           | X          |                    |          |                 |                           |   |   |    |    |    |    |    |  |
| Contact<br>Information         |           | X          |                    |          |                 |                           |   |   |    |    |    |    |    |  |
| Baseline Medical<br>Allocation |           | X          |                    |          |                 |                           |   |   |    |    |    |    |    |  |
|                                |           |            | X                  |          |                 |                           |   |   |    |    |    |    |    |  |





as we are using administrative health data. We have extended our recruitment time from 24 months to 42 months, in response to slow recruitment at the beginning of the study.

### Allocation and Blinding

Participants will be randomly allocated after consent to either the patient navigator intervention or usual care in a 1:1 ratio using a computer-stratified generated randomization sequence, generated a priori by a statistician (author ANA) with varying block sizes, stratified by primary clinic affiliation. Randomization scheme will be executed in REDCap research software.<sup>21</sup> Study coordinators at each site ascertain group allocation by clicking 'randomize' on REDCap, and inform participants of their assigned study arm.

Intervention assignment will not be blinded from trial participants, family members, research assistants, or clinical teams. All patients/family participants will be blinded to the primary outcome (ER/urgent care visit) and hypothesized effects of the study. The navigators will not be blinded to the primary hypothesis. Full details of the navigator intervention will not be available to clinic staff/control participants to minimize contamination of the intervention to the control group. Data analysts will be blinded to group allocation and the nature of the intervention.

### Study Intervention

There will be one navigator in each of Calgary and Edmonton serving approximately 150 participants. These navigators are employees of Alberta Health Services (AHS), the organization that provides government-funded health care to >99% of Alberta residents. Individuals eligible for the patient navigator position will have a minimum of a Bachelor's degree in Social Work and 5 years of clinical experience, including experience working with adolescents and/or young adults. The navigator will be familiar with resources and health services available within AHS and the community. The intervention group will also receive usual care.

The intervention (personalized transition support, access to a patient navigator) is designed to overcome barriers and challenges experienced by transferring patients by facilitating a coordinated entry into the adult system, to increase appropriate use of adult-oriented ambulatory primary and specialty care, and reduce ER/urgent care visits (primary outcome).<sup>22,23</sup> We developed a structured navigator intervention with four distinct inter-related modules based on literature highlighting the need for each<sup>5</sup>, our pre-trial qualitative findings<sup>24</sup>, and in collaboration with content experts in transition models, partners in Alberta Health Services, and patient/parent advisory committees. We also developed a 2-day training program for the navigators to complete prior to start of the trial. The training consists of readings, case scenarios, and role plays. The modules are:

- **Module 1 Prepare for transfer of care**<sup>25-28</sup> complete needs, risk and transition readiness assessments using a structured approach with modified SSHADESS psychosocial assessment<sup>29</sup> (see supplementary material 2); create medical passport; help establish relationships with primary care providers and appropriate specialty care providers; and enable timely attendance at first adult clinic visit.
- **Module 2 Navigator as a health system broker**<sup>30-32</sup>: assist with data sharing between pediatric and adult service providers; work with patient and primary care providers to facilitate

1  
2  
3 continuity of care; promote communication, collaboration, and patient and family centered  
4 care between all providers; and advocate with/for patient/family.

- 5 • **Module 3 Social determinants of health**<sup>33-35</sup>: assist families with barriers related to social and  
6 economic determinants of health to reduce modifiable barriers to accessing ambulatory  
7 medical care after transfer.
- 8 • **Module 4 Promote self-management of medical conditions**<sup>36-39</sup>: provide information and  
9 access to tools, educational resources, and peer support groups; track follow-up clinic visits,  
10 medication refills and laboratory testing in order to flag non-adherence early and provide  
11 coaching to reduce barriers to adherence; and plan for medical and/or mental health crisis  
12 management.  
13  
14  
15

16  
17 Once a participant is randomized to the intervention group, the navigators will contact the  
18 participant within 7 days to schedule a face-to-face (or phone meeting if necessary for rural  
19 dwelling patients) meeting during which the navigator will complete tasks in Module 1. Using  
20 information obtained at this initial assessment, the navigators will use an adaptive<sup>40</sup>, patient-  
21 centered approach that customizes delivery of services based on needs of the patient, and consistent  
22 with principles and practice outlined in Modules 2-4. Navigators will use telephone, text messages,  
23 email messages, and in-person visits to maintain contact with participants as needed during the  
24 course of the intervention. Navigators will be alerted to ER/urgent care visits of participants by  
25 either the participants, caregivers (if appropriate), clinical providers, or through use of electronic  
26 medical record alerts. The navigator will review circumstances related to ER/urgent care visits,  
27 and inform preventative actions based on the intervention modules. Scheduled patient reviews (in  
28 person, or by telephone contact) will occur every 3 months (see Schedule of Assessments, Table  
29 1). The navigators will record every contact and nature of assistance provided using standardized  
30 forms.  
31  
32  
33

### 34 35 **Fidelity**

36  
37 Procedures for monitoring adherence to intervention fidelity by the navigators will be managed by  
38 the Operational Oversight Committee (investigators, policy makers, navigator's supervisors), and  
39 its role will be to assess and enhance fidelity to the intervention throughout the trial. The committee  
40 will review the patient navigator intervention using qualitative interviews of stakeholders and  
41 participants after the first 5 participants are enrolled into the intervention arm in each site. The  
42 knowledge gained from the review will be utilized to optimize the intervention protocol and  
43 address barriers to intervention fidelity across all sites.  
44  
45

46  
47 Deviations will be carefully documented by navigators during their course of the trial. The  
48 navigators will complete a standardized fidelity checklist at the end of each patient encounter to  
49 assess their adherence to skills, interventions and pathways described in the intervention modules  
50 (see supplementary material 3). Concomitant interventions which duplicate the intervention in  
51 whole or in part will be not be permitted during the trial.  
52

53 **Usual care group:** Participants assigned to the usual care group will receive care as available  
54 within adult and pediatric clinics and the health region. However, this group is *not* a 'no  
55 intervention' group; in addition to care provided by their clinical teams, the study team will  
56 provide usual care participants with information in the form of infographics and quarterly  
57

1  
2  
3 newsletters, regarding transition to adult care resources such as young-adult oriented transition  
4 websites, self-management tools, and the opportunity to attend transition-focused workshops.  
5 Significant variation in transitional care is expected in this group within and across sites (based  
6 on our prior stakeholder engagement work).  
7

8  
9 To minimize attrition, all participants in the intervention and usual care group will receive  
10 electronic newsletters every 4 months, letters thanking them for their participation to date and  
11 email and phone reminders for follow-up data collection.  
12

### 13 **Outcome and outcome measures**

14  
15  
16 Outcome measures and the assessment schedule are summarized in Table 1. The primary outcome  
17 is the rate of all-cause ER and urgent care visits during the observation period. Patients, providers,  
18 and policy makers on our team considered ER/urgent care visits to be relevant, and measureable  
19 in a blinded fashion across all clinical groups. We will obtain consent from trial participants to  
20 use their personal health numbers to link with health service utilization data. All ER and urgent  
21 care visits attributed to participants will be obtained from the National Ambulatory Care Reporting  
22 System<sup>41</sup>, and the Clinical Analytics Team of AHS will conduct all analysis. AHS is the custodian  
23 of all Alberta Health data for >99% of population.  
24  
25

26 We will evaluate ambulatory and inpatient care utilization measures as secondary outcomes  
27 (primary care visits, specialty care ambulatory care visits, in-patient admissions, ICU admissions, and  
28 length of hospital stay). Outcome measure will be the rate of events. This data will be obtained  
29 from the Canadian Institute for Health Information Discharge Abstract Database<sup>42</sup>, and physician  
30 billing claims database<sup>43</sup>.  
31  
32

33 Other secondary outcomes are the Transition Readiness Assessment Questionnaire (TRAQ), and  
34 patient reported health status as measured by the 12-Item Short Form Health Survey (SF-12). The  
35 TRAQ is the best-validated transition readiness scale for adolescents<sup>44,45</sup>. The questionnaire  
36 consists of 29 items, at grade 5.7 reading level, and takes ~5 minutes to complete. Participants will  
37 complete the TRAQ online at baseline, 6, 12, 18 and 24 months. Regarding general health,  
38 participants will complete the 12-Item Short Form Health Survey (SF-12) which is a validated 12  
39 item survey that measures self-reported health status in individuals >14 years of age.<sup>46</sup> The survey  
40 includes questions concerning physical functioning, role limitations because of physical health  
41 problems, bodily pain, general health perceptions, vitality (energy/fatigue), social functioning, role  
42 limitations because of emotional problems, and general mental health (psychological distress and  
43 psychological well-being). Participants will complete the SF-12 at baseline, 6, 12, 18 and 24  
44 months.  
45  
46

47  
48 We will prospectively capture the cost of the navigator intervention using micro-costing methods<sup>47</sup>  
49 (identification, measurement, and valuation) that include one time and ongoing costs (development  
50 of materials, capital costs, wage rates for navigators, number of patients in caseload), enabling  
51 estimation of the cost of this intervention per patient served, using high quality administrative  
52 datasets from the AHS Clinical Analytics data repository.<sup>48</sup>  
53  
54

### 55 **Data monitoring and trial management**

1  
2  
3 The trial protocol is registered at [www.clinicaltrials.gov](http://www.clinicaltrials.gov) (NCT03342495). The trial is governed  
4 by multiple stakeholder groups, including clinicians and policy makers at each of the recruiting  
5 sites, study team members, and youth and family members. The Executive Trial Team is  
6 composed of the principal investigators and research team members, as well as site  
7 representatives and a patient representative. The team is supported by the larger Trial  
8 Management Committee, Operational Oversight Committee, Data Safety Monitoring Board  
9 (DSMB), Patient and Family Advisory Council and Scientific Advisory Board. A governance  
10 chart is provided in Figure 5.  
11  
12

13 Potential adverse events will be monitored in both study groups, however, the intervention is  
14 considered to be of minimal risk. No interim analysis is planned. The DSMB consists of 3  
15 individuals who are familiar with the patient population and study question, but unfamiliar with  
16 the research team. The board will meet at least twice a year and monitor the trial in terms of  
17 safety of the participants and rigor of the data collection procedures.  
18  
19

### 20 **Analytical Plan**

21  
22 All analyses will be intention-to-treat. We will use Poisson regression to compare rates of  
23 ER/urgent care visits between the navigator and usual control groups, with fixed as well as random  
24 effects per site, and random effect by primary clinic. Demographic and medical characteristics  
25 that could be potential confounders or independent risk factors (e.g. age, primary disease,  
26 socioeconomic status, location of residence, medical and mental health co-morbidity in participant,  
27 ethnicity, immigrant status, demographic characteristics and medical/mental health of  
28 parents/caregivers obtained with consent) will be collected *a priori*, and used for adjusting the  
29 Poisson model. All other health utilization outcomes will be analyzed using descriptive statistical  
30 methods and by key demographic variables. For TRAQ and SF-12 scores we will assess the effect  
31 of time (baseline, 6, 12, 18 and 24 months) on the scores using linear regression with random  
32 effects for subject and clinic.  
33  
34  
35

36 For the economic evaluation, we will use established methods to enable comparisons of mean  
37 costs, as these are easily interpretable and relevant to health care payer. We will include the full  
38 cost of the navigator intervention (for intervention group) and the health care cost categories noted  
39 above and will use non-parametric bootstrap estimates to derive 95% confidence interval and mean  
40 cost differences between the treatment arms.<sup>49,50</sup> We will use 1000 bias-corrected bootstrap  
41 replications (including sampling with replacement from the original data) to estimate the  
42 distribution of a sampling statistic to derive 95% confidence intervals.<sup>49</sup> We will also compare cost  
43 by category (in-patient, ER, ambulatory care, physician claims) between both groups.  
44  
45  
46

### 47 **Qualitative data analysis**

48  
49 All interviews and focus groups will be audio-taped and transcribed verbatim, and NVivo software  
50 (QSR International Pty Ltd., Version 10, 2012) will be used for analysis. Thematic analysis will  
51 be used to extrapolate and systematically analyze patterns in the data generated by the qualitative  
52 interviews.<sup>50</sup> We will closely adhere to the steps delineated by Braun and Clarke<sup>51</sup> for conducting  
53 thematic analysis. We will use Krueger and Casey's<sup>52</sup> constant comparative method of analysis to  
54 analyze the focus group data. This method involves "cutting, sorting, and arranging through  
55  
56  
57  
58  
59  
60

1  
2  
3 comparing and contrasting.” The coding process consists of grouping similar concepts and ideas,  
4 while identifying themes and categorizing results. The research team will engage in established  
5 steps to increase the validity, credibility, transferability, and dependability of findings by adhering  
6 to guidelines for publication of qualitative research studies.<sup>53</sup>  
7

## 8 9 **Confidentiality**

10  
11 The RCT and qualitative studies will adhere to the Personal Health Information Protection Act and  
12 all other regulatory and organizational standards for privacy, confidentiality and security of  
13 database information. All patient-identifiable electronic data will be stored in password protected  
14 encrypted files on a secure network. Any identifiable information stored on REDCap will only be  
15 accessed by the investigative team and will be de-identified in the data export prior to analysis. All  
16 identifying information stored on paper will be stored in locked cabinets.  
17  
18

## 19 **Ethics and Dissemination**

20  
21  
22 Ethics approval was obtained from the University of Calgary Conjoint Health Research Ethics  
23 Board (REB #162561) and the University of Alberta Health Research Ethics Board  
24 (Pro00077325).  
25

26  
27 We have used an integrated knowledge translation approach.<sup>54,55</sup> Our team is comprised of patient  
28 representatives, researchers, clinical service providers and senior policy makers who are  
29 committed to improving transition and transfer of care within Alberta. At the end of the study, we  
30 will conduct face to face stakeholder meetings to develop a holistic understanding of the barriers  
31 and facilitators to transitional care and the effectiveness of the patient navigator service using both  
32 quantitative and qualitative data obtained in this study.  
33

## 34 **Patient and Public Involvement**

35  
36  
37 Our team is comprised of patient representatives, researchers, clinical service providers and  
38 senior policy makers who are committed to improving transition and transfer of care within  
39 Alberta. We developed the intervention and strategy for implementation and evaluation after  
40 extensive consultation and engagement with stakeholders in sub-specialty pediatrics and adult  
41 chronic disease clinics, emergency medicine, the Well on Your Way Transition Program at  
42 ACH, Calgary Zone Primary Care Networks, the Calgary Zone Primary Care & Chronic Disease  
43 Management Program, the SCH Family-Centered Care Team, and senior leadership within each  
44 tertiary care hospital. We conducted pre-trial qualitative interviews and focus groups with  
45 relevant stakeholders (patients and families who recently transitioned to adult care, providers and  
46 policy makers) to understand their perspectives regarding contextual variables affecting  
47 transition and refined the intervention based on results of this work. We engaged the Child and  
48 Youth Advisory Council (a patient council) at the Alberta Children’s Hospital and through a  
49 ranking exercise we found that patients valued interventions with personal contact (e.g. patient  
50 navigator, peer mentor support) more than those with less personal contact (social media,  
51 electronic apps). We are continuing to engage patient council groups such as these in Alberta.  
52 They will be informed of the results periodically during the study and also at the end of study  
53 through newsletters and news releases.  
54  
55  
56  
57  
58  
59  
60

## Discussion

The Transition Navigator Trial is a unique pragmatic population based trial which will address a significant gap in knowledge in the area of transition to adult care. The study will overcome previous methodological limitations including small sample sizes, non-generalizability due to diagnosis- specific inclusion criteria, and non- randomized designs. The results will have the potential to change health care delivery, improve health outcomes, and enhance experiences of young adults transitioning to adult care. The study will also provide a better understanding of the barriers and facilitators to transitional care and the effectiveness of the patient navigator service using both quantitative and qualitative data. We will determine what elements of the navigator service are most beneficial to participants, and whether the intervention is cost saving.

The evidence base for health care interventions during transition to adult care is limited by a paucity of data from controlled studies. Various interventions have been described and tested to a limited extent, mostly using non-randomized designs. Most are single centre, single disease studies, with limited generalizability. Gabriel *et al.*<sup>5</sup> performed a systematic review of evidence focused on transition interventions. They report that structured transition interventions led to improvement in patient reported quality of life and perceived health status in several studies, suggesting potential publication bias. No studies have found significant cost savings; several studies found that having a structured transition process resulted in increased visits to the new adult provider, and a reduced time lag between the last pediatric visit and the first adult visit<sup>stein</sup><sup>56</sup>

The current study will be aligned with the Triple Aim Framework for health service evaluation<sup>57</sup>. Interventions requiring highly skilled health care workers tend to be expensive, and to justify such an intervention, a cost evaluation is necessary. Complex interventions require assessment of fidelity to examine whether the intervention was delivered as intended, including a description of the interventions. This study will address these challenges.

In conclusion, this pragmatic RCT will evaluate the impact of a patient navigator service on rates of urgent care/ER visits and will provide patient, family and provider perceptions of the transition experience and the navigator service. This study will provide urgently needed data to guide pediatric and adult health care providers and policy makers regarding optimal transitional care delivery.

## Acknowledgements:

We would like to acknowledge Sarah Gil for the creation of the figures used in this paper. We thank the patients and families who contributed to the development of this intervention and the design of the trial.

## Figure Legends:

1  
2  
3 Figure 1. Trial Design. A randomized control trial.

4  
5 Figure 2. CONSORT Diagram

6  
7 Figure 3. Participating Clinics. Clinics participating in the Transition Navigator Trial

8  
9 Figure 4. Study Timeline.

10  
11 Figure 5. Governance of the Transition Navigator Trial. ACH: Alberta Children's Hospital;  
12 ACHRI: Alberta Children's Hospital Research Institute; GRH: Glenrose Rehabilitation Hospital;  
13 MNCY SCN: Maternal Newborn Child Youth Strategic Clinical Network; SCH: Stollery  
14 Children's Hospital

## 15 REFERENCES

- 16  
17  
18  
19  
20 1. Kaufman M, Pinzon J. Transition to Adult Care for Youth with Special Health Care Needs.  
21 *Paediatr Child Health*. 2007;12(9):785-788.
- 22 2. Bloom SR, Kuhlthau K, Van Cleave J, Knapp AA, Newacheck P, Perrin JM. Health Care Transition  
23 for Youth With Special Health Care Needs. *Journal of Adolescent Health*. 2012;51(3):213-219.
- 24 3. Van Wallegghem N, Macdonald CA, Dean HJ. Evaluation of a Systems Navigator Model for  
25 Transition from Pediatric to Adult Care for Young Adults with Type 1 Diabetes. *Diabetes Care*.  
26 2008;31(8):1529-1530.
- 27 4. Prestidge C, Romann A, Djurdjev O, Matsuda-Abedini M. Utility and cost of a renal transplant  
28 transition clinic. *Pediatric nephrology (Berlin, Germany)*. 2012;27(2):295-302.
- 29 5. Gabriel P, McManus M, Rogers K, White P. Outcome Evidence for Structured Pediatric to Adult  
30 Health Care Transition Interventions: A Systematic Review. *J Pediatr*. 2017;188:263-269 e215.
- 31 6. Chan AW, Tetzlaff JM, Altman DG, Dickersin K, Moher D. SPIRIT 2013: new guidance for content  
32 of clinical trial protocols. *Lancet (London, England)*. 2013;381(9861):91-92.
- 33 7. Chan AW, Tetzlaff JM, Altman DG, et al. SPIRIT 2013 statement: defining standard protocol items  
34 for clinical trials. *Annals of internal medicine*. 2013;158(3):200-207.
- 35 8. Chan AW, Tetzlaff JM, Gotzsche PC, et al. SPIRIT 2013 explanation and elaboration: guidance for  
36 protocols of clinical trials. *Bmj*. 2013;346:e7586.
- 37 9. Zwarenstein M, Treweek S, Gagnier JJ, et al. Improving the reporting of pragmatic trials: an  
38 extension of the CONSORT statement. *BMJ*. 2008;337:a2390.
- 39 10. Tong A, Sainsbury P, Craig J. Consolidated criteria for reporting qualitative research (COREQ): a  
40 32-item checklist for interviews and focus groups. *International Journal for Quality in Health  
41 Care*. 2007. Volume 19, Number 6: pp. 349 – 357
- 42 11. Network TE. Enhancing the Quality and Transparency Of health Research.  
43 <https://www.equator-network.org>
- 44 12. Bindels-de Heus KGCB, van Staa A, van Vliet I, Ewals FVPM, Hilberink SR. Transferring Young  
45 People With Profound Intellectual and Multiple Disabilities From Pediatric to Adult Medical  
46 Care: Parents' Experiences and Recommendations. *Intellectual and Developmental Disabilities*.  
47 2013;51(3):176-189.
- 48 13. Foster BJ, Dahhou M, Zhang X, Platt RW, Samuel SM, Hanley JA. Association between age and  
49 graft failure rates in young kidney transplant recipients. *Transplantation*. 2011;92(11):1237-  
50 1243.
- 51  
52  
53  
54  
55  
56  
57  
58  
59  
60



14. Samuel SM, Nettel-Aguirre A, Hemmelgarn BR, et al. Graft Failure and Adaptation Period to Adult Healthcare Centers in Pediatric Renal Transplant Patients. *Transplantation*. 2011;91(12):1380-1385 1310.1097/TP.1380b1013e31821b31822f31824b.
15. Yeung E, Kay J, Roosevelt GE, Brandon M, Yetman AT. Lapse of care as a predictor for morbidity in adults with congenital heart disease. *International journal of cardiology*. 2008;125(1):62-65.
16. Cohen E, Gandhi S, Toulany A, et al. Health Care Use During Transfer to Adult Care Among Youth With Chronic Conditions. *Pediatrics*. 2016;137(3):e20152734.
17. Sevick MA, Trauth JM, Ling BS, et al. Patients with Complex Chronic Diseases: perspectives on supporting self-management. *Journal of general internal medicine*. 2007;22 Suppl 3:438-444.
18. Mackie AS, Islam S, Magill-Evans J, et al. Healthcare transition for youth with heart disease: a clinical trial. *Heart (British Cardiac Society)*. 2014;100(14):1113-1118.
19. Mackie AS, Rempel GR, Kovacs AH, et al. A cluster randomized trial of a transition intervention for adolescents with congenital heart disease: rationale and design of the CHAPTER 2 study. *BMC cardiovascular disorders*. 2016;16:127.
20. Holmes-Walker D, Llewellyn A, Farrell K. A transition care programme which improves diabetes control and reduces hospital admission rates in young adults with Type 1 diabetes aged 15–25 years. *Diabetic medicine*. 2007;24(7):764-769.
21. Paul A. Harris, Robert Taylor, Robert Thielke, Jonathon Payne, Nathaniel Gonzalez, Jose G. Conde, Research electronic data capture (REDCap) – A metadata-driven methodology and workflow process for providing translational research informatics support, *J Biomed Inform*. 2009 Apr;42(2):377-81
22. Betz CL, Redcay G. Dimensions of the transition service coordinator role. *Journal for specialists in pediatric nursing : JSPN*. 2005;10(2):49-59.
23. Betz CL, Redcay G. Lessons learned from providing transition services to adolescents with special health care needs. *Issues in comprehensive pediatric nursing*. 2002;25(2):129-149.
24. Dimitropoulos, G., Morgan-Maver, E., \*Allemang, B., \*Schraeder, K., Scott, S., Pinzon, J., Andrew, G., Guilcher, G., Hamiwka, L., Klarenbach, S., Lang, E., McBrien, K., Nettel-Aguirre, A., Pacaud, D., Zwaigenbaum, L., Mackie, A., & Samuel, S. Health care stakeholder perspectives regarding the role of a patient navigator during transition to adult care. *BMC Health Services Research*. Accepted June 6, 2019
25. Cooley WC, Sagerman PJ. Supporting the health care transition from adolescence to adulthood in the medical home. *Pediatrics*. 2011;128(1):182-200.
26. van Staa A, van der Stege HA, Jedeloo S, Moll HA, Hilberink SR. Readiness to transfer to adult care of adolescents with chronic conditions: exploration of associated factors. *The Journal of adolescent health : official publication of the Society for Adolescent Medicine*. 2011;48(3):295-302.
27. McManus M, White P. Transition to Adult Health Care Services for Young Adults with Chronic Medical Illness and Psychiatric Comorbidity. *Child and adolescent psychiatric clinics of North America*. 2017;26(2):367-380.
28. BC Children's Hospital. Transition to Adult Care. <http://www.bcchildrens.ca/Services/SpecializedPediatrics/YouthHealth/Resources.htm>.
29. American Academy of Pediatrics. Reaching Teens Strength-Based Communication Strategies To Build Resilience and Support Healthy Adolescent Development. Ginsburg KR, Kinsman SB, editors: American Academy of Pediatrics; 2014. 635 p.
30. Coyne B, Hallowell SC, Thompson M. Measurable Outcomes After Transfer From Pediatric to Adult Providers in Youth With Chronic Illness. *The Journal of adolescent health : official publication of the Society for Adolescent Medicine*. 2017;60(1):3-16.

- 1
- 2
- 3
- 4 31. Suris J-C, Akré C, Rutishauser C. How Adult Specialists Deal with the Principles of a Successful Transition. *Journal of Adolescent Health*. 2009;45(6):551-555.
- 5
- 6 32. Lipstein EA, Muething KA, Dodds CM, Britto MT. "I'm the one taking it": adolescent participation in chronic disease treatment decisions. *The Journal of adolescent health : official publication of the Society for Adolescent Medicine*. 2013;53(2):253-259.
- 7
- 8
- 9 33. Ravani P, Bonanni A, Rossi R, Caridi G, Ghiggeri GM. Anti-CD20 Antibodies for Idiopathic Nephrotic Syndrome in Children. *Clin J Am Soc Nephrol*. 2016;11(4):710-720.
- 10
- 11 34. Cramm JM, Strating MM, Sonneveld HM, Nieboer AP. The Longitudinal Relationship Between Satisfaction with Transitional Care and Social and Emotional Quality of Life Among Chronically Ill Adolescents. *Applied research in quality of life*. 2013;8:481-491.
- 12
- 13
- 14 35. Grant C, Pan J. A comparison of five transition programmes for youth with chronic illness in Canada. *Child: care, health and development*. 2011;37(6):815-820.
- 15
- 16 36. Williams T, Sherman EMS, Mah JK, et al. Measurement of medical self-management and transition readiness among Canadian adolescents with special health care needs. *International Journal of Child and Adolescent Health* 2010;3(4):527-535.
- 17
- 18
- 19 37. Akre C, Suris JC. From controlling to letting go: what are the psychosocial needs of parents of adolescents with a chronic illness? *Health education research*. 2014;29(5):764-772.
- 20
- 21
- 22 38. McGrady ME, Hommel KA. Medication adherence and health care utilization in pediatric chronic illness: a systematic review. *Pediatrics*. 2013;132(4):730-740.
- 23
- 24 39. Maslow GR, Chung RJ. Systematic review of positive youth development programs for adolescents with chronic illness. *Pediatrics*. 2013;131(5):e1605-1618.
- 25
- 26 40. Almirall D, Chronis-Tuscano A. Adaptive Interventions in Child and Adolescent Mental Health. *J Clin Child Adolesc Psychol*. 2016;45(4):383-395.
- 27
- 28
- 29 41. Canadian Institute for Health Information. National Ambulatory Care Reporting System Metadata. <https://www.cihi.ca/en/national-ambulatory-care-reporting-system-metadata>
- 30
- 31 42. Canadian Institute for Health Information. Discharge Abstract Database. Data Elements 2018-2019. <https://www.cihi.ca/sites/default/files/document/dad-data-elements-2018-en-web.pdf>
- 32
- 33 43. Canadian Institute for Health Information. National Physician Database Data Release, 2015–2016: Methodological Notes. Ottawa, ON: CIHI; 2017
- 34
- 35 44. Sawicki GS, Lukens-Bull K, Yin X, Demars N, Huang IC, Livingood W, et al. Measuring the Transition Readiness of Youth with Special Healthcare Needs: Validation of the TRAQ—Transition Readiness Assessment Questionnaire. *Journal of Pediatric Psychology*. 2011;36(2):160-71
- 36
- 37
- 38 45. Zhang et al. *BMC Pediatrics* 2014, 14:4. <http://www.biomedcentral.com/1471-2431/14/4>
- 39
- 40 46. Ware J, Jr., Kosinski M, Keller SD. A 12-Item Short-Form Health Survey: construction of scales and preliminary tests of reliability and validity. *Med Care*. 1996;34(3):220-233.
- 41
- 42 47. Gold MR, Siegel, J., Russell, L.B., et al. . *Cost Effectiveness in Health and Medicine*. . New York: Oxford University Press; 1996.
- 43
- 44 48. McBrien KA, Manns BJ, Chui B, et al. Health care costs in people with diabetes and their association with glycemic control and kidney function. *Diabetes Care*. 2013;36(5):1172-1180.
- 45
- 46 49. Desgagne A, Castilloux AM, Angers JF, LeLorier J. The use of the bootstrap statistical method for the pharmacoeconomic cost analysis of skewed data. *Pharmacoeconomics*. 1998;13(5 Pt 1):487-497.
- 47
- 48
- 49 50. Davison AC, Hinkley DV. *Bootstrap methods and their application*. Vol 1: Cambridge university press; 1997.
- 50
- 51 51. Braun V, Clarke V. Using thematic analysis in psychology. *Qualitative Research in Psychology*. 2006;3(2):77-101.
- 52
- 53
- 54
- 55
- 56
- 57
- 58
- 59
- 60

- 1  
2  
3 52. Krueger RAaC, M.A. *Focus groups: A Practical Guide for Applied Research*. 5 ed: Sage  
4 Publications; 2014.  
5 53. Elliott R, Fischer CT, Rennie DL. Evolving guidelines for publication of qualitative research studies  
6 in psychology and related fields. *The British journal of clinical psychology*. 1999;38 (Pt 3):215-  
7 229.  
8 54. Graham ID, Logan J, Harrison MB, et al. Lost in Knowledge Translation: Time for a Map? *J Contin*  
9 *Educ Health Prof*. 2006;26(1):13-24.  
10 55. Straus SE, Tetroe J, Graham I. Defining Knowledge Translation. *CMAJ*. 2009;181(3-4):165-168.  
11 56. Mackie AS, Rempel GR, Kovacs AH, Kaufman, M, Rankin KN, et al. Transition intervention for  
12 adolescents with congenital heart disease. *J Am Coll Cardiol*. 2018; 71(16):1768-1777.  
13 57. Berwick DM, Nolan TW, Whittington J. The triple aim: care, health, and cost. *Health Affairs*  
14 2008;27(3):759–69.  
15  
16  
17  
18  
19  
20  
21  
22  
23  
24  
25  
26  
27  
28  
29  
30  
31  
32  
33  
34  
35  
36  
37  
38  
39  
40  
41  
42  
43  
44  
45  
46  
47  
48  
49  
50  
51  
52  
53  
54  
55  
56  
57  
58  
59  
60

1  
2  
3  
4  
5  
6  
7  
8  
9  
10  
11  
12  
13  
14  
15  
16  
17  
18  
19  
20  
21  
22  
23  
24  
25  
26  
27  
28  
29  
30  
31  
32  
33  
34  
35  
36  
37  
38  
39  
40  
41  
42  
43  
44  
45  
46  
47  
48  
49  
50  
51  
52  
53  
54  
55  
56  
57  
58  
59  
60

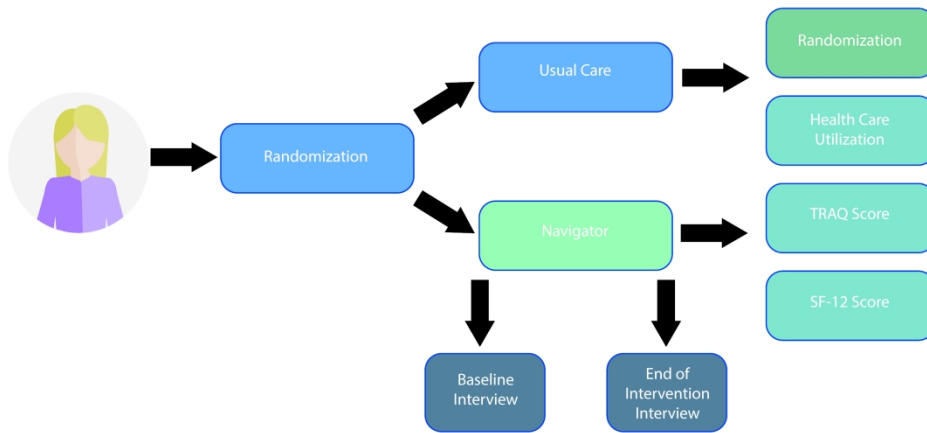

Figure 1 Trial Design

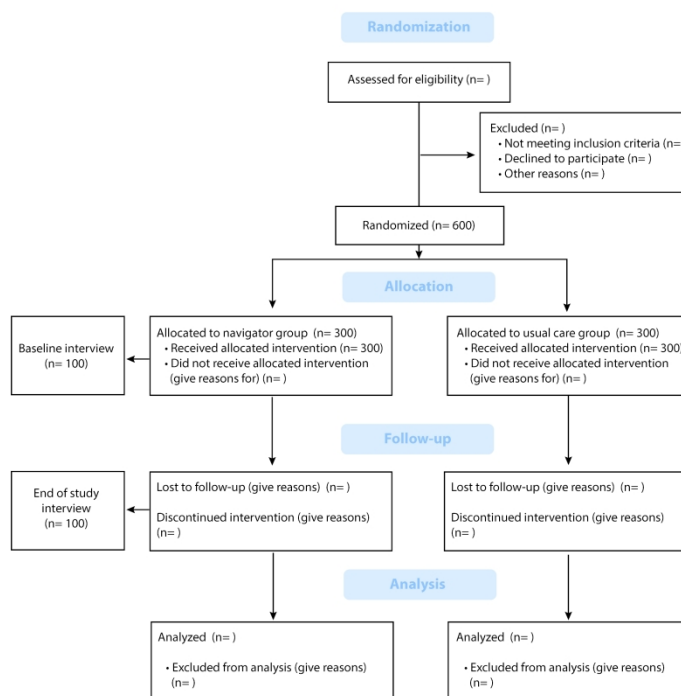

Figure 2 CONSORT Diagram

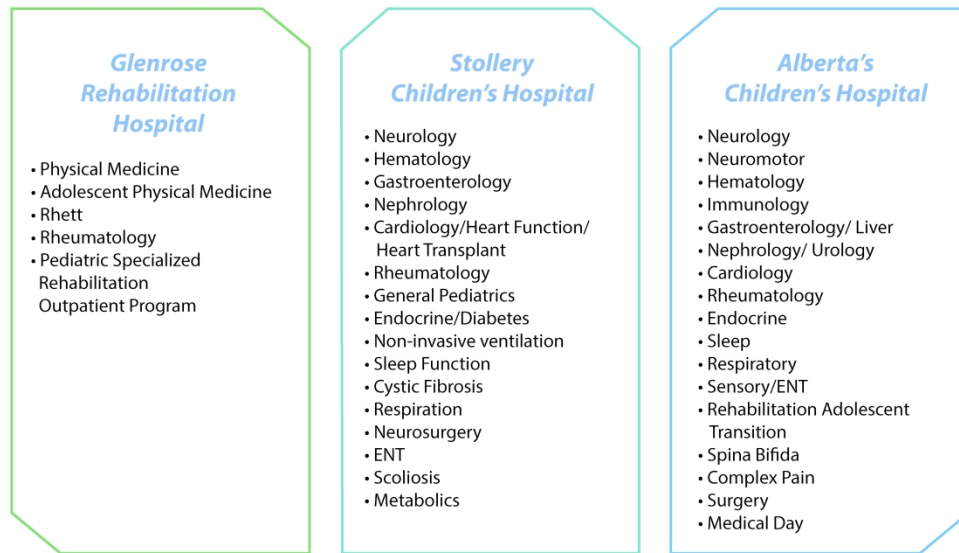

Figure 3 Participating Clinics

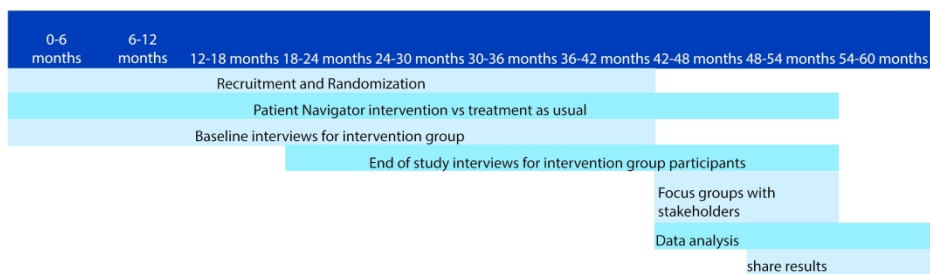

Figure 4 Study Timeline

1  
2  
3  
4  
5  
6  
7  
8  
9  
10  
11  
12  
13  
14  
15  
16  
17  
18  
19  
20  
21  
22  
23  
24  
25  
26  
27  
28  
29  
30  
31  
32  
33  
34  
35  
36  
37  
38  
39  
40  
41  
42  
43  
44  
45  
46  
47  
48  
49  
50  
51  
52  
53  
54  
55  
56  
57  
58  
59  
60

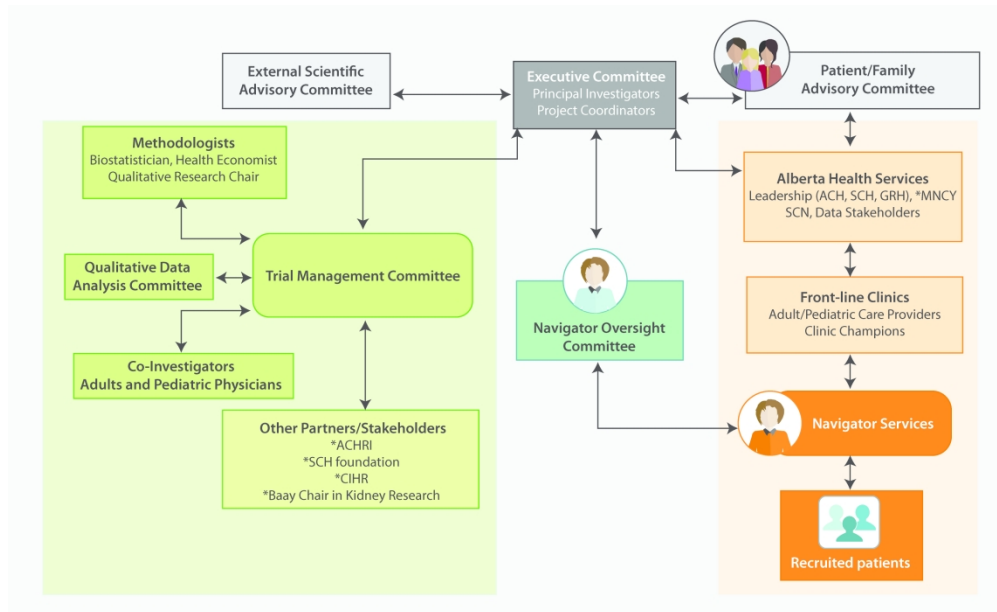

Figure: Governance of the Transition Navigator Trial. ACH: Alberta Children's Hospital; ACHRI: Alberta Children's Hospital Research Institute; GRH: Glenrose Rehabilitation Hospital; MNCY SCN: Maternal Newborn Child Youth Strategic Clinical Network; SCH: Stollery Children's Hospital

Figure 5. Trial Governance



1  
2  
3 **Supplementary Material 1: Example of participant consent form**

4  
5 **CONSENT TO PARTICIPATE IN RESEARCH**

6  
7 **TRANSITION AGE YOUTH**

8  
9 **TITLE**

10 **Evaluating Innovations in Transition to Adult Care: Transition Navigator Trial**

11  
12 **SPONSORS**

- 13
  - 14 • Alberta Children’s Hospital Research Institute BMO Endowed Award for Healthy Living
  - 15 • Alberta Health Services, Maternal Newborn Child and Youth Strategic Clinical Network, Health Outcomes Improvement Fund
  - 16 • Canadian Institutes for Health Research

17  
18  
19 **PRINCIPAL INVESTIGATORS**

20 Susan Samuel, MD, MSc Alberta Children’s Hospital  
21 (403) 955-7950

22  
23 Andrew Mackie, MD, MSc Stollery Children’s Hospital  
24 (780) 407-8361

25  
26 Gina Dimitropoulos, MSW, PhD University of Calgary  
27 (403) 220-7332

28  
29  
30  
31 **CO-INVESTIGATORS:** Please see attached list.

32  
33  
34 *In the sections that follow, the word “**we**” means the study doctor and other*  
35 *research staff. If you are a parent or legal guardian who is giving permission for a*  
36 *child, please note that the word “**you**” refers to your child (if your child is not*  
37 *capable of legal consent).*

38  
39  
40  
41 This consent form is only part of the process of informed consent. It should give you the basic  
42 idea of what the research is about and what your participation will involve. If you would like  
43 more detail about something mentioned here, or information not included here, please ask the  
44 research staff. Take the time to read this carefully and to understand the information. You will  
45 receive a copy of this form.

46  
47 **BACKGROUND**

48 Transition to adult care is a difficult time for youth and young adults with  
49 chronic health conditions. Many youth and families struggle to get used to the  
50 adult care settings, and report difficulties accessing needed services to manage  
51 their health conditions into adulthood.  
52  
53

54  
55  
56 **WHAT IS THE PURPOSE OF THE STUDY?**

1  
2  
3 **We are evaluating whether a patient navigator service will improve patient**  
4 **health and experience, after transfer to adult care. A navigator is an**  
5 **individual who will be able to provide help and refer you to different**  
6 **services and resources as you transition from pediatric to adult care. We**  
7 **will interview patients and their families to understand needs and**  
8 **difficulties during transition in Alberta and to understand whether a**  
9 **navigator will help overcome barriers to care. We will perform a cost**  
10 **analysis to determine if providing the navigator involvement is cost-**  
11 **saving to the health system.**  
12  
13  
14  
15  
16

17 We intend to recruit 600 youth/young adults and their families over three  
18 years, 300 in each major urban area, Edmonton and Calgary. Of these,  
19 approximately half will receive the navigator service, and half will receive the  
20 usual care in the health system by random selection (meaning a computer will  
21 decide which participant goes into which group).  
22  
23  
24  
25

26 Participants will be contacted and be fully informed of the results of the trial at  
27 the end of the study. Everyone in the study will receive periodic newsletters  
28 regarding current resources within Alberta for transition to adult care.  
29  
30  
31

### 32 **WHAT WOULD I HAVE TO DO?**

33 If you consent to be a part of this trial, this is what will happen:  
34  
35  
36

- 37 1) You will be asked to provide some basic information about yourself.
- 38 2) You will be asked to provide your Alberta Health Care number and residence postal  
39 code, in order for us to find your medical records within Alberta Health Services health  
40 records. Examining data from these records will help us understand how you will use the  
41 health care system after transfer to adult care.
- 42 3) You will be asked to complete standardized assessments at enrollment, periodically  
43 thereafter and at study end. These assessments will take approximately 10 minutes each.
  - 44 a. Transition Readiness Assessment Questionnaire (20 questions)
  - 45 b. SF-12 (Health Survey) (12 questions)

46 Only a sample of the participants will be contacted. See Figure 1 below.

- 47 4) If you are randomized into the “patient navigator” group, you will be contacted by a  
48 patient navigator to assist in your transition and transfer process. The navigator will work  
49 with you to ensure that you are able to access appropriate healthcare services in the adult  
50 system, and guide you to resources you may need. The navigator will be available to you  
51  
52  
53  
54  
55  
56  
57  
58  
59  
60

for up to 24 months. If you are assigned to this group, you will receive further information regarding this service. You may be contacted at the beginning of the study for a telephone interview (approximately 45 minutes) by research staff to ask you some questions about your upcoming move from pediatric to adult healthcare. At the end of the study, you may be asked to participate in another telephone interview (approximately 45 minutes) to reflect on your experiences around the transition to adult healthcare. Only a sample of the participants will be contacted for these interviews. See Figure 1 below.

- 5) If you are randomized into the “usual care” group, you will receive the usual support that your clinic and healthcare teams provide.
- 6) We will observe your progress through the adult health care system by tracking how you use the health system (hospitalizations, emergency room visits, primary care visits).
- 7) A small number of participants (5 to 10) who experience a good or bad transition outcome will be asked to participate in more detailed interviews to understand the root cause of the outcomes. This is called a case study (approximately 1-2 hours).
- 8) You will have the opportunity to journal/ write your story during transition on the researcher’s database (REDCap). This is optional.
- 9) At the end of the study, we will contact you or your nominated delegate (parent or guardian) to complete an End of Study form which will ask you the some basic questions about your life at that time (education, employment, satisfaction with health care, income, extended medical insurance etc.)
- 10) This study does not affect routine care.

**Figure 1**

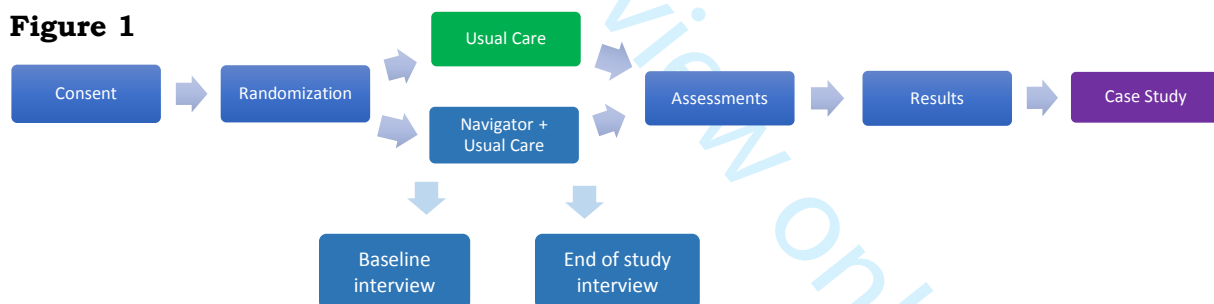

### **WHAT ARE THE RISKS?**

There are no known risks to you associated with this study, and in particular when receiving support from the patient navigator. You are always in control of the information you share with study staff/researchers and your health care professionals.

If you experience discomfort, distress or get upset during your interactions with the navigator, you can decline navigator assistance at any time, yet you may choose to continue in the study. Should you be asked to participate in interviews or focus groups, you may experience a range of responses during and after the interview process, including feelings of discomfort and for some, distress. If you become upset during or after completing the interview, please mention it to the researcher. A member of the research team will be available to find you support if needed. We will also provide you with a list of community resources that can be accessed if you need additional support.

1  
2  
3  
4  
5 **WILL I BENEFIT IF I TAKE PART?**  
6

7 If you agree to participate in this study there may or may not be a direct benefit to you. There is  
8 no guarantee that this research will help you. The information we get from this study may help us  
9 to provide better services and support in the future for youth and their families who are  
10 transitioning into the adult healthcare system.  
11

12  
13 **DO I HAVE TO PARTICIPATE?**  
14

15 Participation in this study is voluntary and you may withdraw from the study at any time without  
16 jeopardizing your health care. If you wish to withdraw, please contact the study coordinator,  
17 listed on the last page.  
18

19 **WILL I BE PAID FOR PARTICIPATING, OR DO I HAVE TO PAY FOR**  
20 **ANYTHING?**  
21

22 You will be given a gift card or cash value of \$25 after you have enrolled in the study and  
23 completed the baseline questionnaires. You will receive another gift card or cash value of \$25 at  
24 the end of the study. You will be reimbursed if you incur parking costs while you are  
25 participating in research.  
26  
27

28  
29 **WILL MY RECORDS BE KEPT PRIVATE?**  
30

31 Your personal and health information will be only accessible to the research team members who  
32 are conducting the data analysis. We will use the personal health information number provided to  
33 find records with Alberta Health Services administrative datasets (healthcare records), in order  
34 to understand how the health care system is being used to get medical care. All the data will be  
35 kept on password protected network computers, with controlled access. All paper documents will  
36 be locked up in a secured research area. In addition, authorized representatives from the  
37 University of Calgary and the Conjoint Health Research Ethics Board may look at your  
38 identifiable medical/clinical study records held at the Alberta Children's Hospital for quality  
39 assurance purposes.  
40  
41

42 **IF I SUFFER A RESEARCH-RELATED INJURY, WILL I BE COMPENSATED?**  
43

44 In the event that you suffer injury as a result of participating in this research, no compensation  
45 will be provided to you by the researchers or sponsors. You still have all your legal rights.  
46 Nothing said in this consent form alters your right to seek damages.  
47  
48

49 Signature page follows.  
50  
51  
52  
53  
54  
55  
56  
57  
58  
59

**SIGNATURES**

Your signature on this form indicates that you understood to your satisfaction the information regarding your participation in the research project and agree to participate. In no way does this waive your legal rights nor release the investigators or involved institutions from their legal and professional responsibilities. You are free to withdraw from the study at any time without jeopardizing your health care. If you have further questions concerning matters related to this research, please contact: Dr. Susan Samuel (403) 955-7950 or Study Coordinator: Gurkeet Lalli (403) 955-2769.

If you have any questions concerning your rights as a possible participant in this research, please contact the Chair, Conjoint Health Research Ethics Board, University of Calgary at 403-220-7990.

I agree to allow the researchers and/or navigator to contact my parents or guardians as needed to facilitate care and to disclose medical information to my parents/guardians. My parent or guardian can participate in the study if they are interested.

YES  NO

I agree to allow the researchers to contact me at the end of the study. (See number 9 above). If I am unable to respond, I hereby nominate the following person to answer in my stead, and you have my permission to contact the delegate.

YES  NO

Name of Delegate: \_\_\_\_\_

Contact Information for Delegate: \_\_\_\_\_

I agree to allow the researchers to contact me for future studies related to transition to adult care.

YES  NO

\_\_\_\_\_  
*Printed name of participant (or legal representative on behalf of participant)*

\_\_\_\_\_  
*Signature of participant (or legal representative on behalf of participant)* *Date*

\_\_\_\_\_  
*Printed name of person who explained consent* *Signature* *Date*

1  
2  
3  
4  
5  
6  
7  
8  
9  
10  
11  
12  
13  
14  
15  
16  
17  
18  
19  
20  
21  
22  
23  
24  
25  
26  
27  
28  
29  
30  
31  
32  
33  
34  
35  
36  
37  
38  
39  
40  
41  
42  
43  
44  
45  
46  
47  
48  
49  
50  
51  
52  
53  
54  
55  
56  
57  
58  
59  
60

For peer review only

**Supplementary Material 2: Initial encounter assessment template used by patient navigators**

|                                                                                                                                                                                                                                                                                                                                                                                      |
|--------------------------------------------------------------------------------------------------------------------------------------------------------------------------------------------------------------------------------------------------------------------------------------------------------------------------------------------------------------------------------------|
| <b>Study ID</b>                                                                                                                                                                                                                                                                                                                                                                      |
| <b>Family physician</b>                                                                                                                                                                                                                                                                                                                                                              |
| <b>Current pediatric specialists</b>                                                                                                                                                                                                                                                                                                                                                 |
| <b>Pending adult specialists- list or summary</b>                                                                                                                                                                                                                                                                                                                                    |
| <b>Other services (including mental health)</b>                                                                                                                                                                                                                                                                                                                                      |
| <b>Community agencies currently involved in care</b>                                                                                                                                                                                                                                                                                                                                 |
| <b>Medical status</b><br>-medical diagnoses and medical history summary<br>-psychiatric/mental health diagnoses<br>-neurodevelopmental diagnoses<br>-past surgical history<br>-medication summary<br>-laboratory frequencies, investigations<br>-medical devices, required assistance (oxygen, CPAP)<br>-special adaptations required in adult care centre<br>-funding/medical costs |
| <b>Functional status</b><br>-communication<br>-activities of daily living<br>-mobility                                                                                                                                                                                                                                                                                               |

**Modified SSHADES Psychosocial Assessment:**

|                                                                                                                                                                                                                                                                                                                                                                                                                                                                                                           |
|-----------------------------------------------------------------------------------------------------------------------------------------------------------------------------------------------------------------------------------------------------------------------------------------------------------------------------------------------------------------------------------------------------------------------------------------------------------------------------------------------------------|
| <b>Strengths</b><br><i>*tell me about the things you are good at</i><br><i>*what would others say you are good at</i><br><i>*what do you think are your best qualities?</i>                                                                                                                                                                                                                                                                                                                               |
| <b>School and Employment</b><br><i>*is client currently in school</i><br><i>*how much school has client missed due to illness</i><br><i>*how does illness affect schooling</i><br><i>*what are client's thoughts about school? (shy, lots of friends, bullied, conflict?)</i><br><i>*school achievement</i><br><i>*participation in school activities and/or sport</i><br><i>*goals after school</i><br><i>*does participant have a SIN number</i><br><i>*past employment</i><br><i>*employment goals</i> |
| <b>Home and Environment</b><br><b>Housing and Immediate family</b><br><i>*housing security/safety</i><br><i>*who resides in the home</i><br><i>*who frequents the home</i><br><i>*future housing plans</i><br><i>*court orders/custody documents- impact on medical planning</i>                                                                                                                                                                                                                          |
| <b>Supports</b>                                                                                                                                                                                                                                                                                                                                                                                                                                                                                           |

1  
2  
3 \*relationship function  
4 \*family supports  
5 \*peer supports  
6 \*spirituality/religion  
7 \*professional supports  
8 \*who do you turn to when condition worsens  
9

10 **Finances**

11 \*income sources  
12 \*monthly income  
13 \*health insurance and extended health coverage  
14 \*food security  
15 \*does participant have a bank account (sole or joint? Must be sole to receive AB Works unless  
16 trusteeship)  
17 \*does participant have photo ID  
18  
19

20 **Transportation**

21 \*how do you get around?  
22 \*is transportation a barrier to obtaining medical care OR adhering to medical plan?  
23

24 **Activities**

25 \*organized activities  
26 \*informal leisure  
27 \*solo versus social activities  
28 \*financial barriers to participating in activities

29 **Drugs/Substance Use**

30 \*use harm-reduction approach  
31 \*is there anyone in your life who has issue with substance abuse?  
32 \*participant's history of substance use/abuse, including legal, illicit and prescription  
33 \*does participant have insight into how substances impact general health and his/her particular medical  
34 condition(s)  
35 \*do you know where to get information on substance abuse?  
36 \*complete AADIS if appropriate

37 **Emotions/Depression**

38 \*how is your mood  
39 \*self-harm, suicidal ideation  
40 \*coping and adjustment to illness  
41 \*relationship between mental health and condition  
42

43 **Sexuality**

44 \*relationship status and history  
45 \*gender identity and sexual orientation  
46 \*reproductive sexual health  
47 \*do you know where to get information on safe sex and sexual health

48 **Safety**

49 \*how safe do you feel at school/home/work  
50 \*domestic violence history  
51 \*neighbourhood and community safety  
52 \*history of involvement with legal system  
53 \*do safety concerns affect medical care or adherence to medical plan?  
54  
55

56 **Transition Plan:**



1  
2  
3  
4  
5  
6  
7  
8  
9  
10  
11  
12  
13  
14  
15  
16  
17  
18  
19  
20  
21  
22  
23  
24  
25  
26  
27  
28  
29  
30  
31  
32  
33  
34  
35  
36  
37  
38  
39  
40  
41  
42  
43  
44  
45  
46  
47  
48  
49  
50  
51  
52  
53  
54  
55  
56  
57  
58  
59  
60

|                                                                                      |
|--------------------------------------------------------------------------------------|
| <b>TRAQ Summary</b><br>-notify study staff if not completed                          |
| <b>Preparation</b><br>-summary<br>-goals (patient-specific)<br>-actions (navigator)  |
| <b>Self-management</b><br>-summary<br>-goals<br>-actions                             |
| <b>Systems brokering</b><br>-summary<br>-goals<br>-actions                           |
| <b>Social determinants of health</b><br>-summary<br>-goals<br>-actions               |
| <b>Navigator prospective estimate of case complexity at assessment: low/med/high</b> |

### Supplementary Material 3

#### Navigator Fidelity Checklist

##### Date of Transfers

In how many clinics is this participant being transferred?

- 1  
 2  
 3  
 4  
 5  
 6

##### Date of Reviews

Date of 3 Month Review \_\_\_\_\_ (YYYY-MM-DD)

Date of 6 Month Review \_\_\_\_\_ (YYYY-MM-DD)

Date of 9 Month Review \_\_\_\_\_ (YYYY-MM-DD)

Date of 12 Month Review \_\_\_\_\_ (YYYY-MM-DD)

Date of 15 Month Review \_\_\_\_\_ (YYYY-MM-DD)

Date of 18 Month Review \_\_\_\_\_ (YYYY-MM-DD)

Date of 21 Month Review \_\_\_\_\_ (YYYY-MM-DD)

Date of 24 Month Review \_\_\_\_\_ (YYYY-MM-DD)

##### Module 1: Preparing for transfer of care

|                                                                                                             | 3 month                  | 6 Month                  | 9 month                  | 12 month                 | 15 month                 | 18 month                 | 21 month                 | 24 month                 | N/A                      |
|-------------------------------------------------------------------------------------------------------------|--------------------------|--------------------------|--------------------------|--------------------------|--------------------------|--------------------------|--------------------------|--------------------------|--------------------------|
| Explained the ROLE of the navigation service                                                                | <input type="checkbox"/> |
| Discussed/provided RESOURCES on patient and family-centered care                                            | <input type="checkbox"/> |
| Completed psychosocial ASSESSMENTS (HEADSS, SSHADESS)                                                       | <input type="checkbox"/> |
| Completed a comprehensive TRANSITION PLAN                                                                   | <input type="checkbox"/> |
| Facilitated TRANSFER of medical and psychosocial DATA                                                       | <input type="checkbox"/> |
| Helped participant prepare succinct COMMUNICATION TOOLS (e.g., medical passport, 3 sentence health summary) | <input type="checkbox"/> |

|                                                                                                       |                          |                          |                          |                          |                          |                          |                          |                          |                          |
|-------------------------------------------------------------------------------------------------------|--------------------------|--------------------------|--------------------------|--------------------------|--------------------------|--------------------------|--------------------------|--------------------------|--------------------------|
| Assisted with SCHEDULING adult oriented medical appointments                                          | <input type="checkbox"/> |
| Assisted with ACCESSING RESOURCES/SERVICES within the community and/or adult-oriented health services | <input type="checkbox"/> |
| Helped participant find a FAMILY DOCTOR or primary care clinic                                        | <input type="checkbox"/> |

Comments:

---

**Module 2: Promote self-management**

|                                                                                                                                                                     | 3 month                  | 6 Month                  | 9 month                  | 12 month                 | 15 month                 | 18 month                 | 21 month                 | 24 month                 | N/A                      |
|---------------------------------------------------------------------------------------------------------------------------------------------------------------------|--------------------------|--------------------------|--------------------------|--------------------------|--------------------------|--------------------------|--------------------------|--------------------------|--------------------------|
| COACHED self-management skills and identified strategies to promote adherence to medical care plans (e.g., role play, checklists)                                   | <input type="checkbox"/> |
| Directed participant to TOOLS/RESOURCES to support self-management                                                                                                  | <input type="checkbox"/> |
| Worked with participant (also caregivers and providers as appropriate) to ADDRESS BARRIERS to adherence with medical care plans                                     | <input type="checkbox"/> |
| MONITORED ADHERENCE to medical care plans by direct report from participant (caregivers and/or providers as appropriate) or indirectly by reviewing medical records | <input type="checkbox"/> |
| Established PLAN to address medical CRISIS                                                                                                                          | <input type="checkbox"/> |

Comments:

---

**Module 3: Health systems broker**

|                                                       | 3 month                  | 6 Month                  | 9 month                  | 12 month                 | 15 month                 | 18 month                 | 21 month                 | 24 month                 | N/A                      |
|-------------------------------------------------------|--------------------------|--------------------------|--------------------------|--------------------------|--------------------------|--------------------------|--------------------------|--------------------------|--------------------------|
| Facilitated CONTINUITY OF CARE across adult providers | <input type="checkbox"/> |

|                                                                                  |                          |                          |                          |                          |                          |                          |                          |                          |                          |
|----------------------------------------------------------------------------------|--------------------------|--------------------------|--------------------------|--------------------------|--------------------------|--------------------------|--------------------------|--------------------------|--------------------------|
| Supported ongoing, appropriate ENGAGEMENT with health and mental health services | <input type="checkbox"/> |
| Advocated for timely and appropriate ACCESS to primary care and adult services   | <input type="checkbox"/> |

Comments:

---

#### Module 4: Social determinants of health

|                                                                                                                | 3 month                  | 6 Month                  | 9 month                  | 12 month                 | 15 month                 | 18 month                 | 21 month                 | 24 month                 | N/A                      |
|----------------------------------------------------------------------------------------------------------------|--------------------------|--------------------------|--------------------------|--------------------------|--------------------------|--------------------------|--------------------------|--------------------------|--------------------------|
| Identified SOCIO-ECONOMIC BARRIERS interfering with participant's adherence to medical care plans              | <input type="checkbox"/> |
| Helped participant find ADDITIONAL RESOURCES/PROGRAMS to address modifiable barriers related to service access | <input type="checkbox"/> |
| Assisted with educational, vocational, housing, and/or financial NEEDS for the participant                     | <input type="checkbox"/> |

Comments:

---

# Reporting checklist for protocol of a clinical trial.

Based on the SPIRIT guidelines.

## Instructions to authors

Complete this checklist by entering the page numbers from your manuscript where readers will find each of the items listed below.

Your article may not currently address all the items on the checklist. Please modify your text to include the missing information. If you are certain that an item does not apply, please write "n/a" and provide a short explanation.

Upload your completed checklist as an extra file when you submit to a journal.

In your methods section, say that you used the SPIRIT reporting guidelines, and cite them as:

Chan A-W, Tetzlaff JM, Altman DG, Laupacis A, Gøtzsche PC, Krleža-Jerić K, Hróbjartsson A, Mann H, Dickersin K, Berlin J, Doré C, Parulekar W, Summerskill W, Groves T, Schulz K, Sox H, Rockhold FW, Rennie D, Moher D. SPIRIT 2013 Statement: Defining standard protocol items for clinical trials. *Ann Intern Med.* 2013;158(3):200-207

|                                             |                     | Reporting Item                                                                                               | Page Number |
|---------------------------------------------|---------------------|--------------------------------------------------------------------------------------------------------------|-------------|
| <b>Administrative information</b>           |                     |                                                                                                              |             |
| Title                                       | <a href="#">#1</a>  | Descriptive title identifying the study design, population, interventions, and, if applicable, trial acronym | 1           |
| Trial registration                          | <a href="#">#2a</a> | Trial identifier and registry name. If not yet registered, name of intended registry                         | 1           |
| Trial registration: data set                | <a href="#">#2b</a> | All items from the World Health Organization Trial Registration Data Set                                     |             |
| Protocol version                            | <a href="#">#3</a>  | Date and version identifier                                                                                  | 1           |
| Funding                                     | <a href="#">#4</a>  | Sources and types of financial, material, and other support                                                  | 1           |
| Roles and responsibilities: contributorship | <a href="#">#5a</a> | Names, affiliations, and roles of protocol contributors                                                      | 1-3         |

|    |                               |                     |                                                                                            |     |
|----|-------------------------------|---------------------|--------------------------------------------------------------------------------------------|-----|
| 1  | Roles and                     | <a href="#">#5b</a> | Name and contact information for the trial sponsor                                         |     |
| 2  | responsibilities: sponsor     |                     |                                                                                            |     |
| 3  | contact information           |                     |                                                                                            |     |
| 4  |                               |                     |                                                                                            |     |
| 5  |                               |                     |                                                                                            |     |
| 6  | Roles and                     | <a href="#">#5c</a> | Role of study sponsor and funders, if any, in study design; collection, management,        | 1   |
| 7  | responsibilities: sponsor     |                     | analysis, and interpretation of data; writing of the report; and the decision to submit    |     |
| 8  | and funder                    |                     | the report for publication, including whether they will have ultimate authority over       |     |
| 9  |                               |                     | any of these activities                                                                    |     |
| 10 |                               |                     |                                                                                            |     |
| 11 |                               |                     |                                                                                            |     |
| 12 |                               |                     |                                                                                            |     |
| 13 | Roles and                     | <a href="#">#5d</a> | Composition, roles, and responsibilities of the coordinating centre, steering              | 3-4 |
| 14 | responsibilities:             |                     | committee, endpoint adjudication committee, data management team, and other                |     |
| 15 | committees                    |                     | individuals or groups overseeing the trial, if applicable (see Item 21a for data           |     |
| 16 |                               |                     | monitoring committee)                                                                      |     |
| 17 |                               |                     |                                                                                            |     |
| 18 |                               |                     |                                                                                            |     |
| 19 |                               |                     |                                                                                            |     |
| 20 | <b>Introduction</b>           |                     |                                                                                            |     |
| 21 |                               |                     |                                                                                            |     |
| 22 | Background and                | <a href="#">#6a</a> | Description of research question and justification for undertaking the trial, including    | 7   |
| 23 | rationale                     |                     | summary of relevant studies (published and unpublished) examining benefits and             |     |
| 24 |                               |                     | harms for each intervention                                                                |     |
| 25 |                               |                     |                                                                                            |     |
| 26 |                               |                     |                                                                                            |     |
| 27 |                               |                     |                                                                                            |     |
| 28 | Background and                | <a href="#">#6b</a> | Explanation for choice of comparators                                                      | 7   |
| 29 | rationale: choice of          |                     |                                                                                            |     |
| 30 | comparators                   |                     |                                                                                            |     |
| 31 |                               |                     |                                                                                            |     |
| 32 |                               |                     |                                                                                            |     |
| 33 | Objectives                    | <a href="#">#7</a>  | Specific objectives or hypotheses                                                          | 7   |
| 34 |                               |                     |                                                                                            |     |
| 35 |                               |                     |                                                                                            |     |
| 36 | Trial design                  | <a href="#">#8</a>  | Description of trial design including type of trial (eg, parallel group, crossover,        | 7   |
| 37 |                               |                     | factorial, single group), allocation ratio, and framework (eg, superiority, equivalence,   |     |
| 38 |                               |                     | non-inferiority, exploratory)                                                              |     |
| 39 |                               |                     |                                                                                            |     |
| 40 |                               |                     |                                                                                            |     |
| 41 | <b>Methods: Participants,</b> |                     |                                                                                            |     |
| 42 | <b>interventions, and</b>     |                     |                                                                                            |     |
| 43 | <b>outcomes</b>               |                     |                                                                                            |     |
| 44 |                               |                     |                                                                                            |     |
| 45 |                               |                     |                                                                                            |     |
| 46 | Study setting                 | <a href="#">#9</a>  | Description of study settings (eg, community clinic, academic hospital) and list of        | 8   |
| 47 |                               |                     | countries where data will be collected. Reference to where list of study sites can be      |     |
| 48 |                               |                     | obtained                                                                                   |     |
| 49 |                               |                     |                                                                                            |     |
| 50 |                               |                     |                                                                                            |     |
| 51 |                               |                     |                                                                                            |     |
| 52 | Eligibility criteria          | <a href="#">#10</a> | Inclusion and exclusion criteria for participants. If applicable, eligibility criteria for | 8   |
| 53 |                               |                     | study centres and individuals who will perform the interventions (eg, surgeons,            |     |
| 54 |                               |                     | psychotherapists)                                                                          |     |
| 55 |                               |                     |                                                                                            |     |
| 56 |                               |                     |                                                                                            |     |
| 57 |                               |                     |                                                                                            |     |
| 58 |                               |                     |                                                                                            |     |
| 59 |                               |                     |                                                                                            |     |
| 60 |                               |                     |                                                                                            |     |

|    |                              |                      |                                                                                       |       |
|----|------------------------------|----------------------|---------------------------------------------------------------------------------------|-------|
| 1  | Interventions:               | <a href="#">#11a</a> | Interventions for each group with sufficient detail to allow replication, including   | 11    |
| 2  | description                  |                      | how and when they will be administered                                                |       |
| 3  |                              |                      |                                                                                       |       |
| 4  |                              |                      |                                                                                       |       |
| 5  | Interventions:               | <a href="#">#11b</a> | Criteria for discontinuing or modifying allocated interventions for a given trial     | 12    |
| 6  | modifications                |                      | participant (eg, drug dose change in response to harms, participant request, or       |       |
| 7  |                              |                      | improving / worsening disease)                                                        |       |
| 8  |                              |                      |                                                                                       |       |
| 9  |                              |                      |                                                                                       |       |
| 10 | Interventions: adherence     | <a href="#">#11c</a> | Strategies to improve adherence to intervention protocols, and any procedures for     | 12    |
| 11 |                              |                      | monitoring adherence (eg, drug tablet return; laboratory tests)                       |       |
| 12 |                              |                      |                                                                                       |       |
| 13 |                              |                      |                                                                                       |       |
| 14 | Interventions:               | <a href="#">#11d</a> | Relevant concomitant care and interventions that are permitted or prohibited during   | n/a   |
| 15 | concomitant care             |                      | the trial                                                                             |       |
| 16 |                              |                      |                                                                                       |       |
| 17 |                              |                      |                                                                                       |       |
| 18 | Outcomes                     | <a href="#">#12</a>  | Primary, secondary, and other outcomes, including the specific measurement            | 13    |
| 19 |                              |                      | variable (eg, systolic blood pressure), analysis metric (eg, change from baseline,    |       |
| 20 |                              |                      | final value, time to event), method of aggregation (eg, median, proportion), and time |       |
| 21 |                              |                      | point for each outcome. Explanation of the clinical relevance of chosen efficacy and  |       |
| 22 |                              |                      | harm outcomes is strongly recommended                                                 |       |
| 23 |                              |                      |                                                                                       |       |
| 24 |                              |                      |                                                                                       |       |
| 25 |                              |                      |                                                                                       |       |
| 26 | Participant timeline         | <a href="#">#13</a>  | Time schedule of enrolment, interventions (including any run-ins and washouts),       | 9, 13 |
| 27 |                              |                      | assessments, and visits for participants. A schematic diagram is highly recommended   |       |
| 28 |                              |                      | (see Figure)                                                                          |       |
| 29 |                              |                      |                                                                                       |       |
| 30 |                              |                      |                                                                                       |       |
| 31 |                              |                      |                                                                                       |       |
| 32 | Sample size                  | <a href="#">#14</a>  | Estimated number of participants needed to achieve study objectives and how it was    | 10    |
| 33 |                              |                      | determined, including clinical and statistical assumptions supporting any sample size |       |
| 34 |                              |                      | calculations                                                                          |       |
| 35 |                              |                      |                                                                                       |       |
| 36 |                              |                      |                                                                                       |       |
| 37 | Recruitment                  | <a href="#">#15</a>  | Strategies for achieving adequate participant enrolment to reach target sample size   | 8     |
| 38 |                              |                      |                                                                                       |       |
| 39 |                              |                      |                                                                                       |       |
| 40 | <b>Methods: Assignment</b>   |                      |                                                                                       |       |
| 41 | <b>of interventions (for</b> |                      |                                                                                       |       |
| 42 | <b>controlled trials)</b>    |                      |                                                                                       |       |
| 43 |                              |                      |                                                                                       |       |
| 44 |                              |                      |                                                                                       |       |
| 45 | Allocation: sequence         | <a href="#">#16a</a> | Method of generating the allocation sequence (eg, computer-generated random           | 11    |
| 46 | generation                   |                      | numbers), and list of any factors for stratification. To reduce predictability of a   |       |
| 47 |                              |                      | random sequence, details of any planned restriction (eg, blocking) should be          |       |
| 48 |                              |                      | provided in a separate document that is unavailable to those who enrol participants   |       |
| 49 |                              |                      | or assign interventions                                                               |       |
| 50 |                              |                      |                                                                                       |       |
| 51 |                              |                      |                                                                                       |       |
| 52 |                              |                      |                                                                                       |       |
| 53 |                              |                      |                                                                                       |       |
| 54 | Allocation concealment       | <a href="#">#16b</a> | Mechanism of implementing the allocation sequence (eg, central telephone;             | 11    |
| 55 | mechanism                    |                      | sequentially numbered, opaque, sealed envelopes), describing any steps to conceal     |       |
| 56 |                              |                      | the sequence until interventions are assigned                                         |       |
| 57 |                              |                      |                                                                                       |       |
| 58 |                              |                      |                                                                                       |       |
| 59 |                              |                      |                                                                                       |       |
| 60 |                              |                      |                                                                                       |       |

|    |                            |                      |                                                                                           |     |
|----|----------------------------|----------------------|-------------------------------------------------------------------------------------------|-----|
| 1  | Allocation:                | <a href="#">#16c</a> | Who will generate the allocation sequence, who will enrol participants, and who will      | 11  |
| 2  | implementation             |                      | assign participants to interventions                                                      |     |
| 3  |                            |                      |                                                                                           |     |
| 4  |                            |                      |                                                                                           |     |
| 5  | Blinding (masking)         | <a href="#">#17a</a> | Who will be blinded after assignment to interventions (eg, trial participants, care       | 11  |
| 6  |                            |                      | providers, outcome assessors, data analysts), and how                                     |     |
| 7  |                            |                      |                                                                                           |     |
| 8  |                            |                      |                                                                                           |     |
| 9  | Blinding (masking):        | <a href="#">#17b</a> | If blinded, circumstances under which unblinding is permissible, and procedure for        | n/a |
| 10 | emergency unblinding       |                      | revealing a participant's allocated intervention during the trial                         |     |
| 11 |                            |                      |                                                                                           |     |
| 12 |                            |                      |                                                                                           |     |
| 13 | <b>Methods: Data</b>       |                      |                                                                                           |     |
| 14 | <b>collection,</b>         |                      |                                                                                           |     |
| 15 | <b>management, and</b>     |                      |                                                                                           |     |
| 16 | <b>analysis</b>            |                      |                                                                                           |     |
| 17 |                            |                      |                                                                                           |     |
| 18 |                            |                      |                                                                                           |     |
| 19 | Data collection plan       | <a href="#">#18a</a> | Plans for assessment and collection of outcome, baseline, and other trial data,           | 13  |
| 20 |                            |                      | including any related processes to promote data quality (eg, duplicate measurements,      |     |
| 21 |                            |                      | training of assessors) and a description of study instruments (eg, questionnaires,        |     |
| 22 |                            |                      | laboratory tests) along with their reliability and validity, if known. Reference to       |     |
| 23 |                            |                      | where data collection forms can be found, if not in the protocol                          |     |
| 24 |                            |                      |                                                                                           |     |
| 25 |                            |                      |                                                                                           |     |
| 26 |                            |                      |                                                                                           |     |
| 27 |                            |                      |                                                                                           |     |
| 28 | Data collection plan:      | <a href="#">#18b</a> | Plans to promote participant retention and complete follow-up, including list of any      | 13  |
| 29 | retention                  |                      | outcome data to be collected for participants who discontinue or deviate from             |     |
| 30 |                            |                      | intervention protocols                                                                    |     |
| 31 |                            |                      |                                                                                           |     |
| 32 |                            |                      |                                                                                           |     |
| 33 | Data management            | <a href="#">#19</a>  | Plans for data entry, coding, security, and storage, including any related processes to   |     |
| 34 |                            |                      | promote data quality (eg, double data entry; range checks for data values). Reference     |     |
| 35 |                            |                      | to where details of data management procedures can be found, if not in the protocol       |     |
| 36 |                            |                      |                                                                                           |     |
| 37 |                            |                      |                                                                                           |     |
| 38 |                            |                      |                                                                                           |     |
| 39 | Statistics: outcomes       | <a href="#">#20a</a> | Statistical methods for analysing primary and secondary outcomes. Reference to            | 14  |
| 40 |                            |                      | where other details of the statistical analysis plan can be found, if not in the protocol |     |
| 41 |                            |                      |                                                                                           |     |
| 42 |                            |                      |                                                                                           |     |
| 43 | Statistics: additional     | <a href="#">#20b</a> | Methods for any additional analyses (eg, subgroup and adjusted analyses)                  | 14  |
| 44 | analyses                   |                      |                                                                                           |     |
| 45 |                            |                      |                                                                                           |     |
| 46 |                            |                      |                                                                                           |     |
| 47 | Statistics: analysis       | <a href="#">#20c</a> | Definition of analysis population relating to protocol non-adherence (eg, as              |     |
| 48 | population and missing     |                      | randomised analysis), and any statistical methods to handle missing data (eg,             |     |
| 49 | data                       |                      | multiple imputation)                                                                      |     |
| 50 |                            |                      |                                                                                           |     |
| 51 |                            |                      |                                                                                           |     |
| 52 | <b>Methods: Monitoring</b> |                      |                                                                                           |     |
| 53 |                            |                      |                                                                                           |     |
| 54 | Data monitoring: formal    | <a href="#">#21a</a> | Composition of data monitoring committee (DMC); summary of its role and                   | 14  |
| 55 | committee                  |                      | reporting structure; statement of whether it is independent from the sponsor and          |     |
| 56 |                            |                      | competing interests; and reference to where further details about its charter can be      |     |
| 57 |                            |                      |                                                                                           |     |
| 58 |                            |                      |                                                                                           |     |
| 59 |                            |                      |                                                                                           |     |
| 60 |                            |                      |                                                                                           |     |



found, if not in the protocol. Alternatively, an explanation of why a DMC is not needed

|    |                          |                      |                                                                                         |
|----|--------------------------|----------------------|-----------------------------------------------------------------------------------------|
| 1  |                          |                      |                                                                                         |
| 2  |                          |                      |                                                                                         |
| 3  |                          |                      |                                                                                         |
| 4  | Data monitoring:         | <a href="#">#21b</a> | Description of any interim analyses and stopping guidelines, including who will         |
| 5  | interim analysis         |                      | have access to these interim results and make the final decision to terminate the trial |
| 6  |                          |                      |                                                                                         |
| 7  |                          |                      | n/a, no                                                                                 |
| 8  |                          |                      | interim                                                                                 |
| 9  |                          |                      | analyses                                                                                |
| 10 |                          |                      | planned                                                                                 |
| 11 | Harms                    | <a href="#">#22</a>  | Plans for collecting, assessing, reporting, and managing solicited and spontaneously    |
| 12 |                          |                      | reported adverse events and other unintended effects of trial interventions or trial    |
| 13 |                          |                      | conduct                                                                                 |
| 14 |                          |                      |                                                                                         |
| 15 |                          |                      |                                                                                         |
| 16 | Auditing                 | <a href="#">#23</a>  | Frequency and procedures for auditing trial conduct, if any, and whether the process    |
| 17 |                          |                      | will be independent from investigators and the sponsor                                  |
| 18 |                          |                      |                                                                                         |
| 19 |                          |                      |                                                                                         |
| 20 | <b>Ethics and</b>        |                      |                                                                                         |
| 21 | <b>dissemination</b>     |                      |                                                                                         |
| 22 |                          |                      |                                                                                         |
| 23 |                          |                      |                                                                                         |
| 24 | Research ethics          | <a href="#">#24</a>  | Plans for seeking research ethics committee / institutional review board (REC / IRB)    |
| 25 | approval                 |                      | approval                                                                                |
| 26 |                          |                      |                                                                                         |
| 27 |                          |                      |                                                                                         |
| 28 | Protocol amendments      | <a href="#">#25</a>  | Plans for communicating important protocol modifications (eg, changes to eligibility    |
| 29 |                          |                      | criteria, outcomes, analyses) to relevant parties (eg, investigators, REC / IRBs, trial |
| 30 |                          |                      | participants, trial registries, journals, regulators)                                   |
| 31 |                          |                      |                                                                                         |
| 32 |                          |                      |                                                                                         |
| 33 | Consent or assent        | <a href="#">#26a</a> | Who will obtain informed consent or assent from potential trial participants or         |
| 34 |                          |                      | authorised surrogates, and how (see Item 32)                                            |
| 35 |                          |                      |                                                                                         |
| 36 |                          |                      |                                                                                         |
| 37 | Consent or assent:       | <a href="#">#26b</a> | Additional consent provisions for collection and use of participant data and            |
| 38 | ancillary studies        |                      | biological specimens in ancillary studies, if applicable                                |
| 39 |                          |                      |                                                                                         |
| 40 |                          |                      |                                                                                         |
| 41 | Confidentiality          | <a href="#">#27</a>  | How personal information about potential and enrolled participants will be collected,   |
| 42 |                          |                      | shared, and maintained in order to protect confidentiality before, during, and after    |
| 43 |                          |                      | the trial                                                                               |
| 44 |                          |                      |                                                                                         |
| 45 |                          |                      |                                                                                         |
| 46 | Declaration of interests | <a href="#">#28</a>  | Financial and other competing interests for principal investigators for the overall     |
| 47 |                          |                      | trial and each study site                                                               |
| 48 |                          |                      |                                                                                         |
| 49 |                          |                      |                                                                                         |
| 50 | Data access              | <a href="#">#29</a>  | Statement of who will have access to the final trial dataset, and disclosure of         |
| 51 |                          |                      | contractual agreements that limit such access for investigators                         |
| 52 |                          |                      |                                                                                         |
| 53 |                          |                      |                                                                                         |
| 54 | Ancillary and post trial | <a href="#">#30</a>  | Provisions, if any, for ancillary and post-trial care, and for compensation to those    |
| 55 | care                     |                      | who suffer harm from trial participation                                                |
| 56 |                          |                      |                                                                                         |
| 57 |                          |                      |                                                                                         |
| 58 |                          |                      |                                                                                         |
| 59 |                          |                      |                                                                                         |
| 60 |                          |                      |                                                                                         |

|    |                       |                      |                                                                                            |              |
|----|-----------------------|----------------------|--------------------------------------------------------------------------------------------|--------------|
| 1  | Dissemination policy: | <a href="#">#31a</a> | Plans for investigators and sponsor to communicate trial results to participants,          | 15           |
| 2  | trial results         |                      | healthcare professionals, the public, and other relevant groups (eg, via publication,      |              |
| 3  |                       |                      | reporting in results databases, or other data sharing arrangements), including any         |              |
| 4  |                       |                      | publication restrictions                                                                   |              |
| 5  |                       |                      |                                                                                            |              |
| 6  |                       |                      |                                                                                            |              |
| 7  |                       |                      |                                                                                            |              |
| 8  | Dissemination policy: | <a href="#">#31b</a> | Authorship eligibility guidelines and any intended use of professional writers             |              |
| 9  | authorship            |                      |                                                                                            |              |
| 10 |                       |                      |                                                                                            |              |
| 11 |                       |                      |                                                                                            |              |
| 12 | Dissemination policy: | <a href="#">#31c</a> | Plans, if any, for granting public access to the full protocol, participant-level dataset, |              |
| 13 | reproducible research |                      | and statistical code                                                                       |              |
| 14 |                       |                      |                                                                                            |              |
| 15 |                       |                      |                                                                                            |              |
| 16 | <b>Appendices</b>     |                      |                                                                                            |              |
| 17 |                       |                      |                                                                                            |              |
| 18 | Informed consent      | <a href="#">#32</a>  | Model consent form and other related documentation given to participants and               | Not included |
| 19 | materials             |                      | authorised surrogates                                                                      | in appendix  |
| 20 |                       |                      |                                                                                            |              |
| 21 |                       |                      |                                                                                            |              |
| 22 | Biological specimens  | <a href="#">#33</a>  | Plans for collection, laboratory evaluation, and storage of biological specimens for       | n/a          |
| 23 |                       |                      | genetic or molecular analysis in the current trial and for future use in ancillary         |              |
| 24 |                       |                      | studies, if applicable                                                                     |              |
| 25 |                       |                      |                                                                                            |              |
| 26 |                       |                      |                                                                                            |              |

None The SPIRIT checklist is distributed under the terms of the Creative Commons Attribution License CC-BY-ND 3.0. This checklist can be completed online using <https://www.goodreports.org/>, a tool made by the [EQUATOR Network](#) in collaboration with [Penelope.ai](#)
