# Supplementary material for: Pragmatic trial evaluating the effectiveness of a patient navigator to decrease emergency room utilisation in transition age youth with chronic conditions: the Transition Navigator Trial protocol
Source: PubMed Central journal article supplement — BMJ Open. 2019 Dec 10;9(12):e034309. doi: 10.1136/bmjopen-2019-034309 (PMC6924868; doi:10.1136/bmjopen-2019-034309), 2019-12-10
Supplement: bmjopen-2019-034309.reviewer_comments.pdf [file bmjopen-2019-034309.reviewer_comments.pdf]

## PEER REVIEW HISTORY

BMJ Open publishes all reviews undertaken for accepted manuscripts. Reviewers are asked to complete a checklist review form (<http://bmjopen.bmj.com/site/about/resources/checklist.pdf>) and are provided with free text boxes to elaborate on their assessment. These free text comments are reproduced below.

## ARTICLE DETAILS

|                            |                                                                                                                                                                                                                                                                |
|----------------------------|----------------------------------------------------------------------------------------------------------------------------------------------------------------------------------------------------------------------------------------------------------------|
| <b>TITLE (PROVISIONAL)</b> | A pragmatic trial evaluating the effectiveness of a patient navigator to decrease emergency room utilization in transition age youth with chronic conditions: The Transition Navigator Trial Protocol                                                          |
| <b>AUTHORS</b>             | Samuel, Susan; Dimitropoulos, Gina; Schraeder, Kyleigh; Klarenbach, Scott; Nettel-Aguirre, Alberto; Guilcher, Greg; Pacaud, D; Pinzon, Jorge; Lang, Eddy; Andrew, Gail; Zwaigenbaum, Lonnie; Scott, Shannon; McBrien, Kerry; Hamiwka, Lorraine; Mackie, Andrew |

This article was not externally reviewed at BMJ Open. Protocols that have been independently assessed prior to submission to BMJ Open are usually fast-tracked to publication on the grounds that further substantial changes will not be possible. This independent assessment will usually be external, independent review for both a substantial grant award from a non-commercial or government funder and ethics approval.
