# Supplementary material for: Pragmatic trial evaluating the effectiveness of a patient navigator to decrease emergency room utilisation in transition age youth with chronic conditions: the Transition Navigator Trial protocol
Source: PubMed Central journal article supplement — BMJ Open. 2019 Dec 10;9(12):e034309. doi: 10.1136/bmjopen-2019-034309 (PMC6924868; doi:10.1136/bmjopen-2019-034309), 2019-12-10
Supplement: bmjopen-2019-034309supp002.pdf [file bmjopen-2019-034309supp002.pdf]

## Supplementary Material 2: Initial encounter assessment template used by patient navigators

|                                                                                                                                                                                                                                                                                                                                                                                      |
|--------------------------------------------------------------------------------------------------------------------------------------------------------------------------------------------------------------------------------------------------------------------------------------------------------------------------------------------------------------------------------------|
| <b>Study ID</b>                                                                                                                                                                                                                                                                                                                                                                      |
| <b>Family physician</b>                                                                                                                                                                                                                                                                                                                                                              |
| <b>Current pediatric specialists</b>                                                                                                                                                                                                                                                                                                                                                 |
| <b>Pending adult specialists- list or summary</b>                                                                                                                                                                                                                                                                                                                                    |
| <b>Other services (including mental health)</b>                                                                                                                                                                                                                                                                                                                                      |
| <b>Community agencies currently involved in care</b>                                                                                                                                                                                                                                                                                                                                 |
| <b>Medical status</b><br>-medical diagnoses and medical history summary<br>-psychiatric/mental health diagnoses<br>-neurodevelopmental diagnoses<br>-past surgical history<br>-medication summary<br>-laboratory frequencies, investigations<br>-medical devices, required assistance (oxygen, CPAP)<br>-special adaptations required in adult care centre<br>-funding/medical costs |
| <b>Functional status</b><br>-communication<br>-activities of daily living<br>-mobility                                                                                                                                                                                                                                                                                               |

### Modified SSHADES Psychosocial Assessment:

|                                                                                                                                                                                                                                                                                                                                                                                                                                                                                                           |
|-----------------------------------------------------------------------------------------------------------------------------------------------------------------------------------------------------------------------------------------------------------------------------------------------------------------------------------------------------------------------------------------------------------------------------------------------------------------------------------------------------------|
| <b>Strengths</b><br><i>*tell me about the things you are good at</i><br><i>*what would others say you are good at</i><br><i>*what do you think are your best qualities?</i>                                                                                                                                                                                                                                                                                                                               |
| <b>School and Employment</b><br><i>*is client currently in school</i><br><i>*how much school has client missed due to illness</i><br><i>*how does illness affect schooling</i><br><i>*what are client's thoughts about school? (shy, lots of friends, bullied, conflict?)</i><br><i>*school achievement</i><br><i>*participation in school activities and/or sport</i><br><i>*goals after school</i><br><i>*does participant have a SIN number</i><br><i>*past employment</i><br><i>*employment goals</i> |
| <b>Home and Environment</b><br><b>Housing and Immediate family</b><br><i>*housing security/safety</i><br><i>*who resides in the home</i><br><i>*who frequents the home</i><br><i>*future housing plans</i><br><i>*court orders/custody documents- impact on medical planning</i><br><br><b>Supports</b>                                                                                                                                                                                                   |

|                                                                                                                                                                                                                                                                                                                                                                                                                                                                                                                                                                                                                                                                                                                                                              |
|--------------------------------------------------------------------------------------------------------------------------------------------------------------------------------------------------------------------------------------------------------------------------------------------------------------------------------------------------------------------------------------------------------------------------------------------------------------------------------------------------------------------------------------------------------------------------------------------------------------------------------------------------------------------------------------------------------------------------------------------------------------|
| <p><i>*relationship function</i></p> <p><i>*family supports</i></p> <p><i>*peer supports</i></p> <p><i>*spirituality/religion</i></p> <p><i>*professional supports</i></p> <p><i>*who do you turn to when condition worsens</i></p> <p><b>Finances</b></p> <p><i>*income sources</i></p> <p><i>*monthly income</i></p> <p><i>*health insurance and extended health coverage</i></p> <p><i>*food security</i></p> <p><i>*does participant have a bank account (sole or joint? Must be sole to receive AB Works unless trusteeship)</i></p> <p><i>*does participant have photo ID</i></p> <p><b>Transportation</b></p> <p><i>*how do you get around?</i></p> <p><i>*is transportation a barrier to obtaining medical care OR adhering to medical plan?</i></p> |
| <p><b>Activities</b></p> <p><i>*organized activities</i></p> <p><i>*informal leisure</i></p> <p><i>*solo versus social activities</i></p> <p><i>*financial barriers to participating in activities</i></p>                                                                                                                                                                                                                                                                                                                                                                                                                                                                                                                                                   |
| <p><b>Drugs/Substance Use</b></p> <p><i>*use harm-reduction approach</i></p> <p><i>*is there anyone in your life who has issue with substance abuse?</i></p> <p><i>*participant's history of substance use/abuse, including legal, illicit and prescription</i></p> <p><i>*does participant have insight into how substances impact general health and his/her particular medical condition(s)</i></p> <p><i>*do you know where to get information on substance abuse?</i></p> <p><i>*complete AADIS if appropriate</i></p>                                                                                                                                                                                                                                  |
| <p><b>Emotions/Depression</b></p> <p><i>*how is your mood</i></p> <p><i>*self-harm, suicidal ideation</i></p> <p><i>*coping and adjustment to illness</i></p> <p><i>*relationship between mental health and condition</i></p>                                                                                                                                                                                                                                                                                                                                                                                                                                                                                                                                |
| <p><b>Sexuality</b></p> <p><i>*relationship status and history</i></p> <p><i>*gender identity and sexual orientation</i></p> <p><i>*reproductive sexual health</i></p> <p><i>*do you know where to get information on safe sex and sexual health</i></p>                                                                                                                                                                                                                                                                                                                                                                                                                                                                                                     |
| <p><b>Safety</b></p> <p><i>*how safe do you feel at school/home/work</i></p> <p><i>*domestic violence history</i></p> <p><i>*neighbourhood and community safety</i></p> <p><i>*history of involvement with legal system</i></p> <p><i>*do safety concerns affect medical care or adherence to medical plan?</i></p>                                                                                                                                                                                                                                                                                                                                                                                                                                          |

Transition Plan:

|                                                                                      |
|--------------------------------------------------------------------------------------|
| <b>TRAQ Summary</b><br>-notify study staff if not completed                          |
| <b>Preparation</b><br>-summary<br>-goals (patient-specific)<br>-actions (navigator)  |
| <b>Self-management</b><br>-summary<br>-goals<br>-actions                             |
| <b>Systems brokering</b><br>-summary<br>-goals<br>-actions                           |
| <b>Social determinants of health</b><br>-summary<br>-goals<br>-actions               |
| <b>Navigator prospective estimate of case complexity at assessment: low/med/high</b> |
