# Supplementary material for: Pragmatic trial evaluating the effectiveness of a patient navigator to decrease emergency room utilisation in transition age youth with chronic conditions: the Transition Navigator Trial protocol
Source: PubMed Central journal article supplement — BMJ Open. 2019 Dec 10;9(12):e034309. doi: 10.1136/bmjopen-2019-034309 (PMC6924868; doi:10.1136/bmjopen-2019-034309), 2019-12-10
Supplement: bmjopen-2019-034309supp003.pdf [file bmjopen-2019-034309supp003.pdf]

**Supplementary Material 3****Navigator Fidelity Checklist****Date of Transfers**

In how many clinics is this participant being transferred?

- 1  
 2  
 3  
 4  
 5  
 6

**Date of Reviews**

Date of 3 Month Review \_\_\_\_\_ (YYYY-MM-DD)

Date of 6 Month Review \_\_\_\_\_ (YYYY-MM-DD)

Date of 9 Month Review \_\_\_\_\_ (YYYY-MM-DD)

Date of 12 Month Review \_\_\_\_\_ (YYYY-MM-DD)

Date of 15 Month Review \_\_\_\_\_ (YYYY-MM-DD)

Date of 18 Month Review \_\_\_\_\_ (YYYY-MM-DD)

Date of 21 Month Review \_\_\_\_\_ (YYYY-MM-DD)

Date of 24 Month Review \_\_\_\_\_ (YYYY-MM-DD)

**Module 1: Preparing for transfer of care**

|                                                                                                             | 3<br>month               | 6<br>Month               | 9<br>month               | 12<br>month              | 15<br>month              | 18<br>month              | 21<br>month              | 24<br>month              | N/A                      |
|-------------------------------------------------------------------------------------------------------------|--------------------------|--------------------------|--------------------------|--------------------------|--------------------------|--------------------------|--------------------------|--------------------------|--------------------------|
| Explained the ROLE of the navigation service                                                                | <input type="checkbox"/> |
| Discussed/provided RESOURCES on patient and family-centered care                                            | <input type="checkbox"/> |
| Completed psychosocial ASSESSMENTS (HEADSS, SSHADESS)                                                       | <input type="checkbox"/> |
| Completed a comprehensive TRANSITION PLAN                                                                   | <input type="checkbox"/> |
| Facilitated TRANSFER of medical and psychosocial DATA                                                       | <input type="checkbox"/> |
| Helped participant prepare succinct COMMUNICATION TOOLS (e.g., medical passport, 3 sentence health summary) | <input type="checkbox"/> |

|                                                                                                       |                          |                          |                          |                          |                          |                          |                          |                          |                          |
|-------------------------------------------------------------------------------------------------------|--------------------------|--------------------------|--------------------------|--------------------------|--------------------------|--------------------------|--------------------------|--------------------------|--------------------------|
| Assisted with SCHEDULING adult oriented medical appointments                                          | <input type="checkbox"/> |
| Assisted with ACCESSING RESOURCES/SERVICES within the community and/or adult-oriented health services | <input type="checkbox"/> |
| Helped participant find a FAMILY DOCTOR or primary care clinic                                        | <input type="checkbox"/> |

Comments:

---

#### Module 2: Promote self-management

|                                                                                                                                                                     | 3 month                  | 6 Month                  | 9 month                  | 12 month                 | 15 month                 | 18 month                 | 21 month                 | 24 month                 | N/A                      |
|---------------------------------------------------------------------------------------------------------------------------------------------------------------------|--------------------------|--------------------------|--------------------------|--------------------------|--------------------------|--------------------------|--------------------------|--------------------------|--------------------------|
| COACHED self-management skills and identified strategies to promote adherence to medical care plans (e.g., role play, checklists)                                   | <input type="checkbox"/> |
| Directed participant to TOOLS/RESOURCES to support self-management                                                                                                  | <input type="checkbox"/> |
| Worked with participant (also caregivers and providers as appropriate) to ADDRESS BARRIERS to adherence with medical care plans                                     | <input type="checkbox"/> |
| MONITORED ADHERENCE to medical care plans by direct report from participant (caregivers and/or providers as appropriate) or indirectly by reviewing medical records | <input type="checkbox"/> |
| Established PLAN to address medical CRISIS                                                                                                                          | <input type="checkbox"/> |

Comments:

---

#### Module 3: Health systems broker

|                                                       | 3 month                  | 6 Month                  | 9 month                  | 12 month                 | 15 month                 | 18 month                 | 21 month                 | 24 month                 | N/A                      |
|-------------------------------------------------------|--------------------------|--------------------------|--------------------------|--------------------------|--------------------------|--------------------------|--------------------------|--------------------------|--------------------------|
| Facilitated CONTINUITY OF CARE across adult providers | <input type="checkbox"/> |

|                                                                                  |                          |                          |                          |                          |                          |                          |                          |                          |                          |
|----------------------------------------------------------------------------------|--------------------------|--------------------------|--------------------------|--------------------------|--------------------------|--------------------------|--------------------------|--------------------------|--------------------------|
| Supported ongoing, appropriate ENGAGEMENT with health and mental health services | <input type="checkbox"/> |
| Advocated for timely and appropriate ACCESS to primary care and adult services   | <input type="checkbox"/> |

Comments:

---

|                                                |  |  |  |  |  |  |  |  |  |
|------------------------------------------------|--|--|--|--|--|--|--|--|--|
| <b>Module 4: Social determinants of health</b> |  |  |  |  |  |  |  |  |  |
|------------------------------------------------|--|--|--|--|--|--|--|--|--|

|                                                                                                                | 3 month                  | 6 Month                  | 9 month                  | 12 month                 | 15 month                 | 18 month                 | 21 month                 | 24 month                 | N/A                      |
|----------------------------------------------------------------------------------------------------------------|--------------------------|--------------------------|--------------------------|--------------------------|--------------------------|--------------------------|--------------------------|--------------------------|--------------------------|
| Identified SOCIO-ECONOMIC BARRIERS interfering with participant's adherence to medical care plans              | <input type="checkbox"/> |
| Helped participant find ADDITIONAL RESOURCES/PROGRAMS to address modifiable barriers related to service access | <input type="checkbox"/> |
| Assisted with educational, vocational, housing, and/or financial NEEDS for the participant                     | <input type="checkbox"/> |

Comments:

---
